# Supplementary material for: Four-Component Synthesis of 9H-Pyrimido[4,5-b]indoles Using Ammonium Iodide as the Nitrogen Source
Source: MDPI journal article supplement (doi:10.3390/catal13030623), 2023-03-20

## Supporting Information

# Four-Component Synthesis of 9*H*-Pyrimido[4,5-*b*]indoles Using Ammonium Iodide as the Nitrogen Source

Yufeng Chen <sup>1</sup>, Ruitong Yang <sup>1</sup>, Fuhong Xiao <sup>1,\*</sup>, Tong Li <sup>1</sup>, Guojiang Mao <sup>2</sup> and Guo-Jun Deng <sup>1,\*</sup>

<sup>1</sup> Key Laboratory of Environmentally Friendly Chemistry and Application of Ministry of Education, Hunan Province Key Laboratory of Green Organic Synthesis and Application, College of Chemistry, Xiangtan University, Xiangtan 411105, China

<sup>2</sup> School of Chemistry and Chemical Engineering, Henan Normal University, Xinxiang, 453007, P. R. China

\* Correspondence: Fuhong Xiao: fhxiao@xtu.edu.cn; Guo-jun Deng: gjdeng@xtu.edu.cn.

# $^1\text{H}$ NMR, $^{13}\text{C}$ NMR and $^{19}\text{F}$ NMR Spectra of Products

$^1\text{H}$  NMR and  $^{13}\text{C}$  NMR of compound 3aa

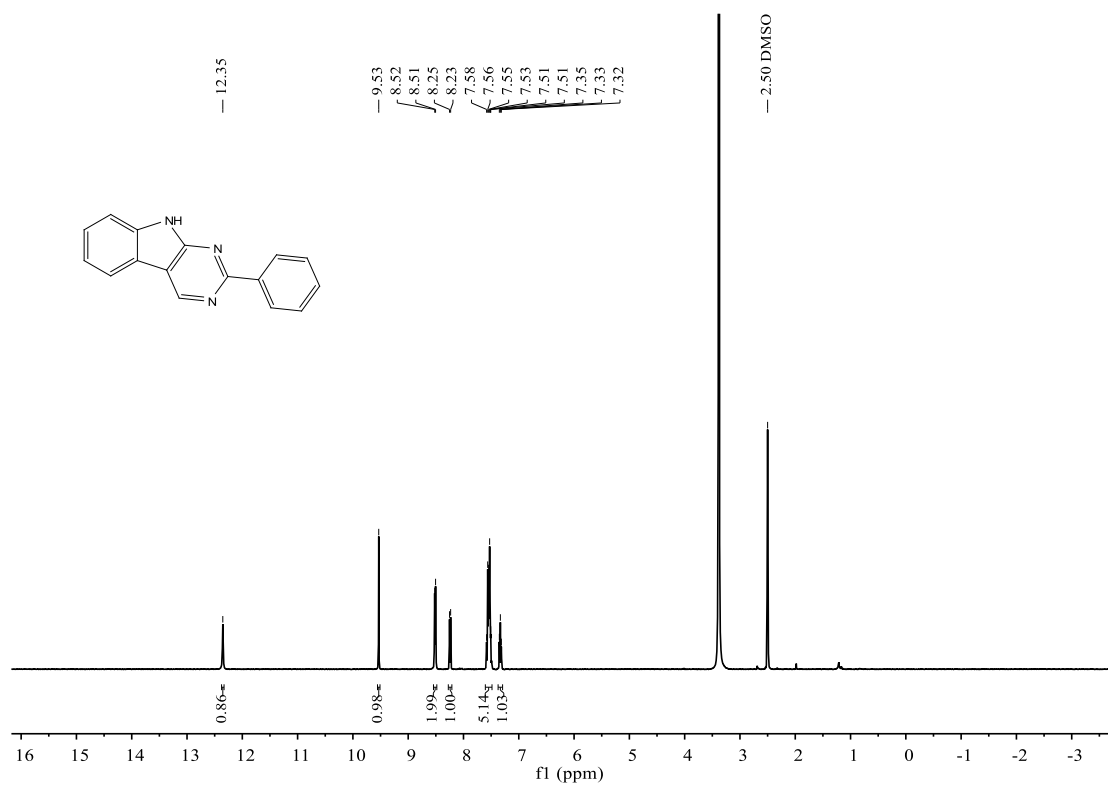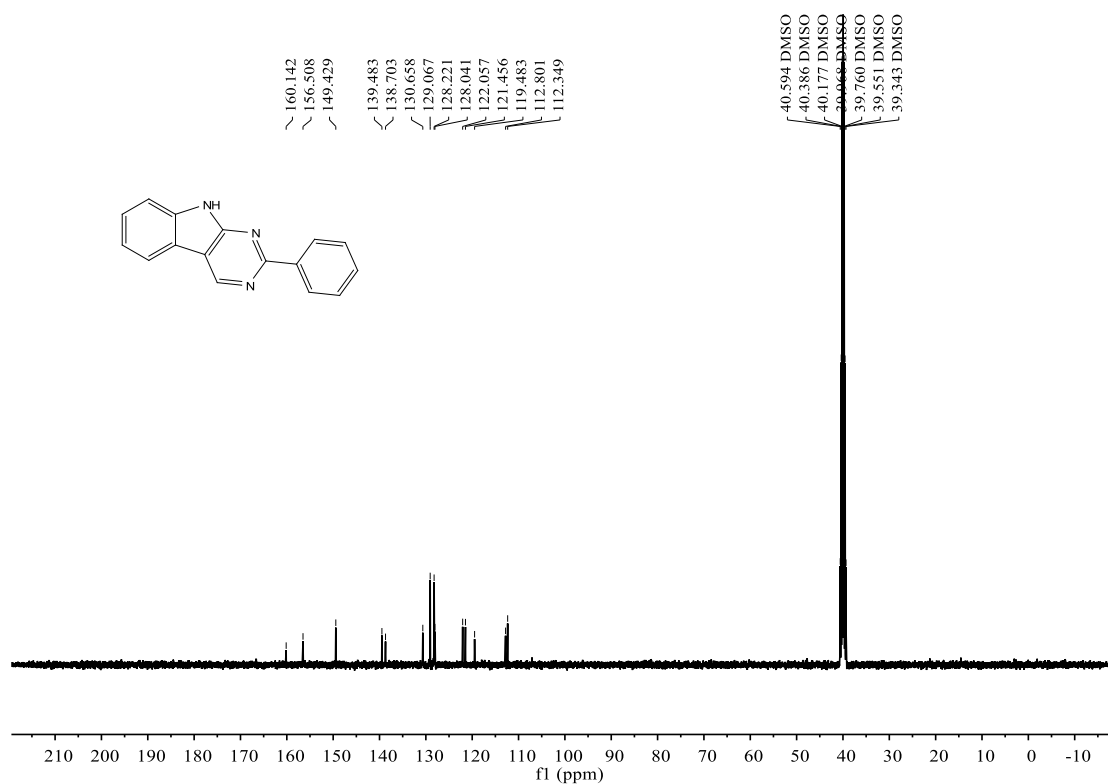

# <sup>1</sup>H NMR and <sup>13</sup>C NMR of compound 3ba

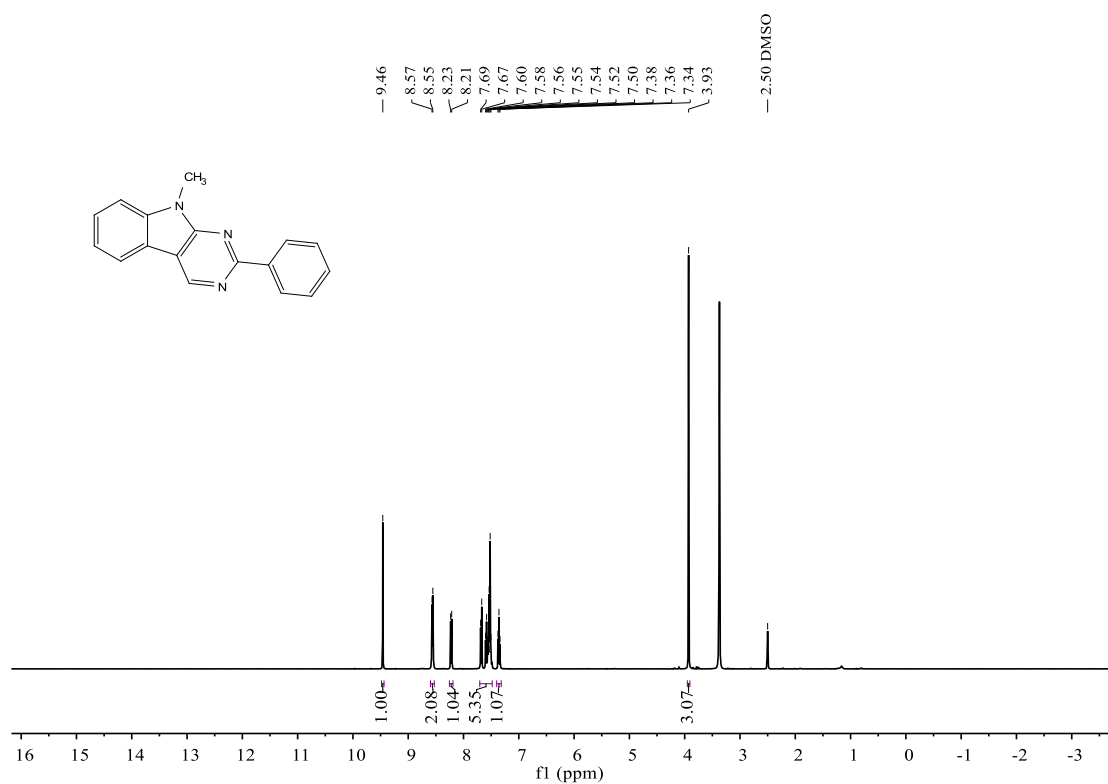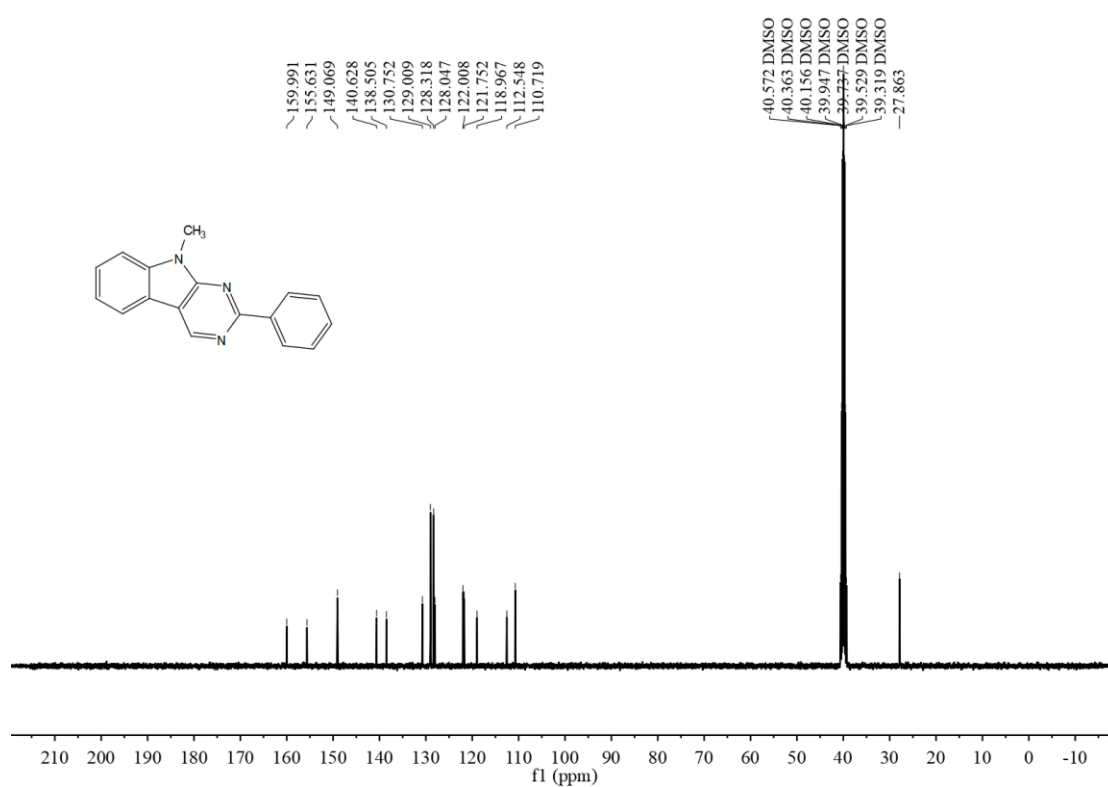

# <sup>1</sup>H NMR and <sup>13</sup>C NMR of compound 3ca

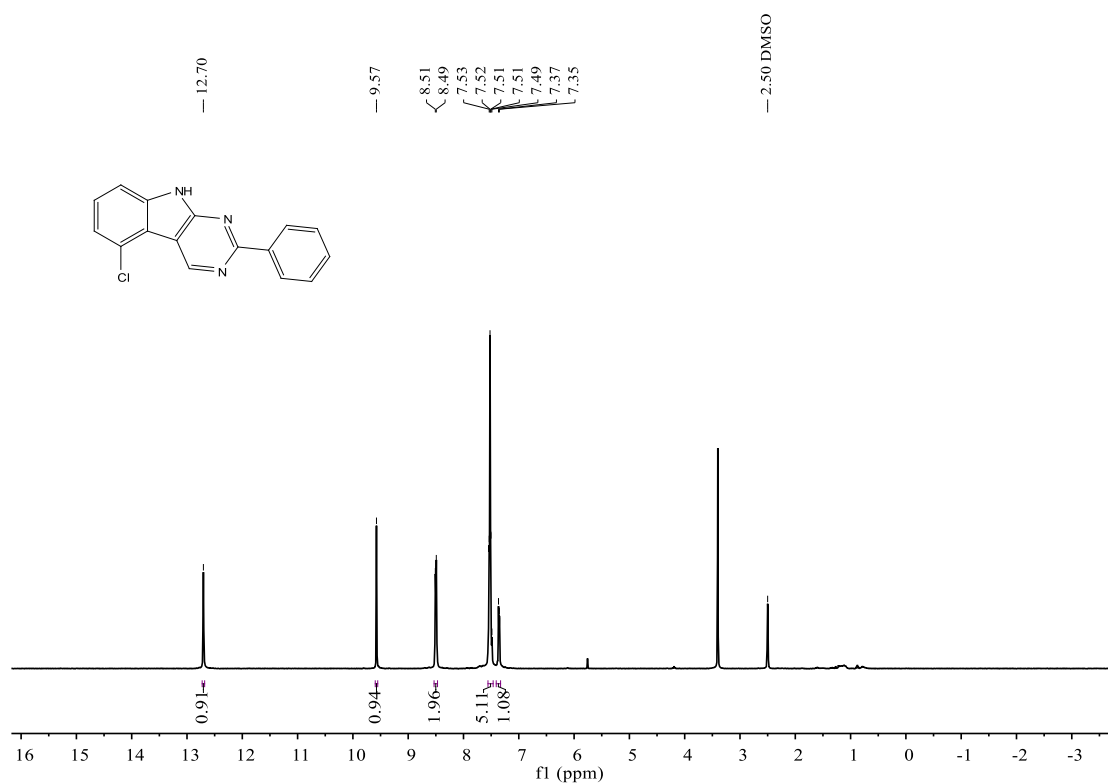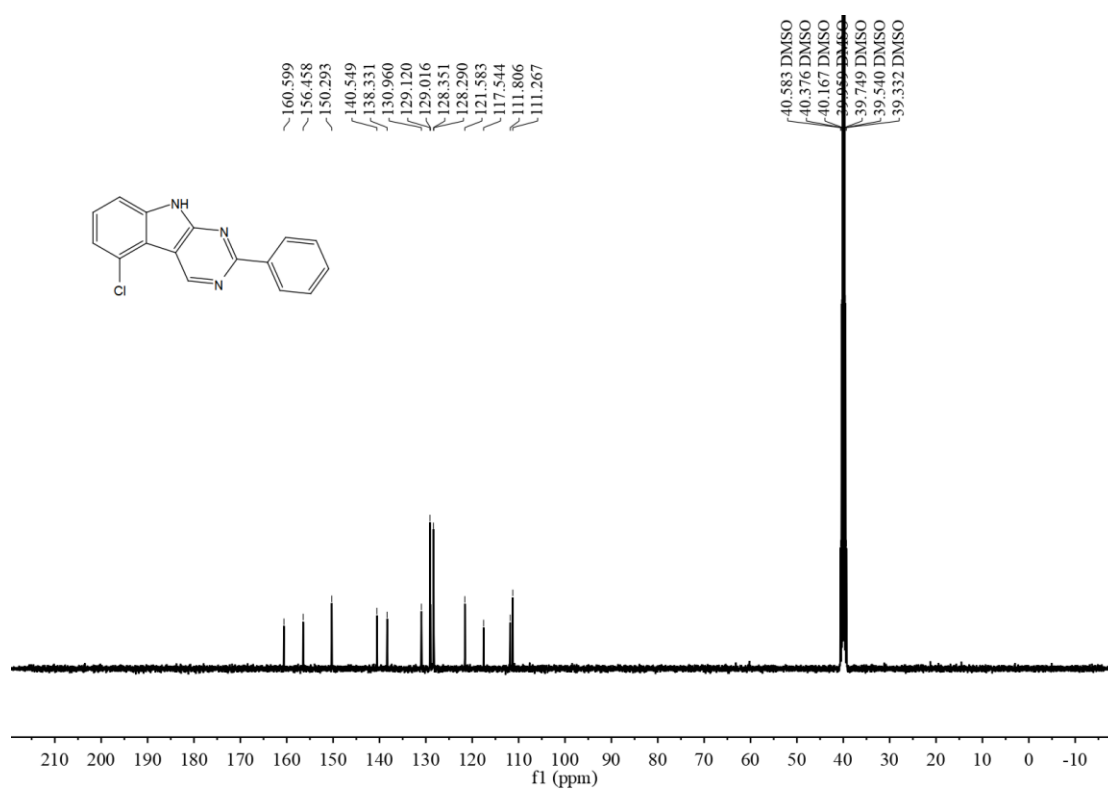

# <sup>1</sup>H NMR and <sup>13</sup>C NMR of compound 3da

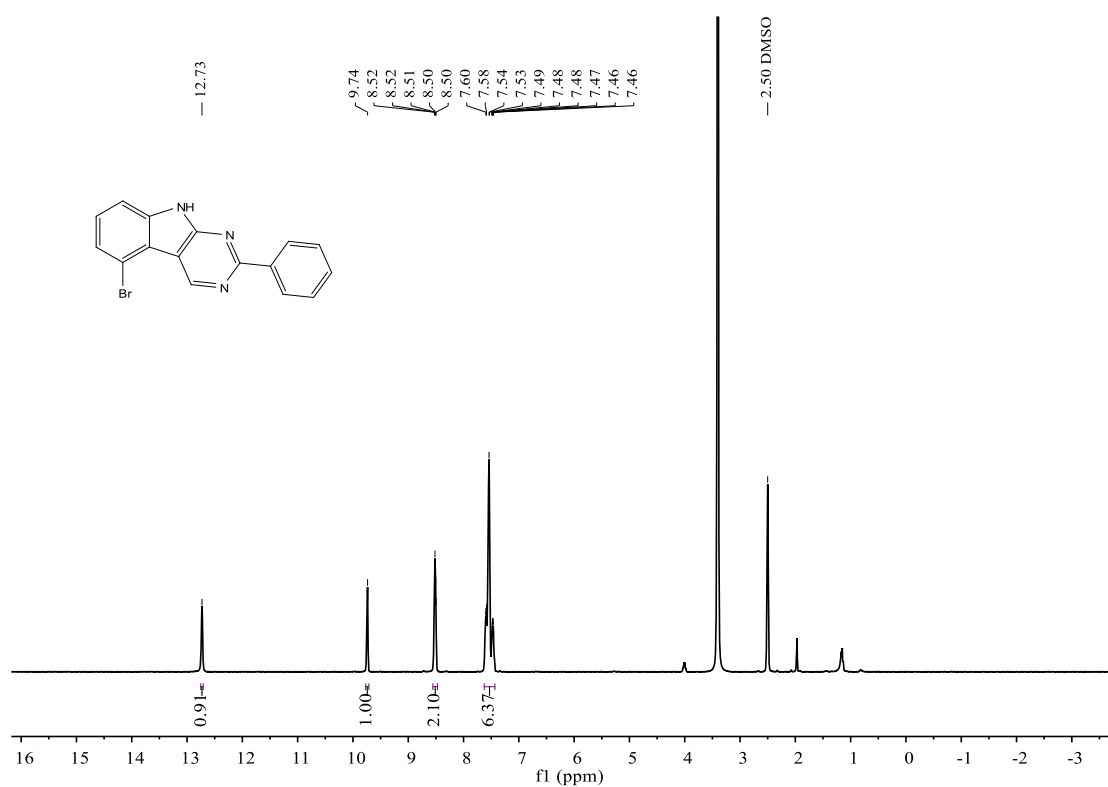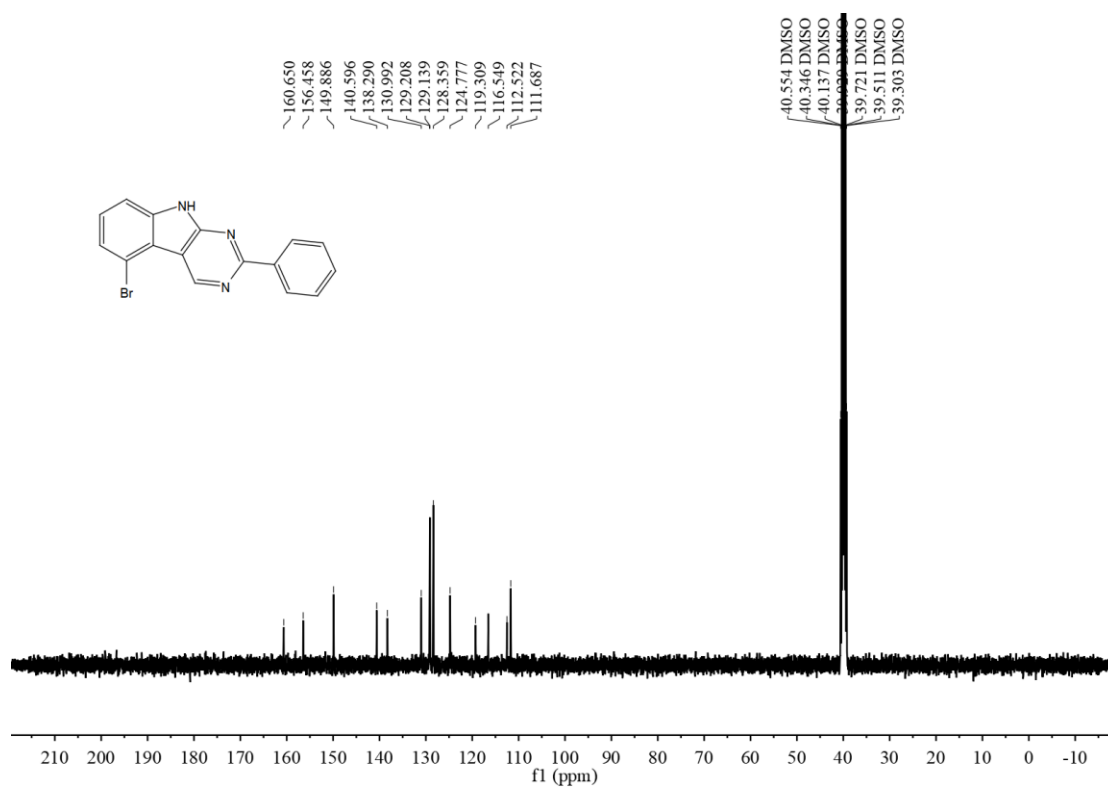

# <sup>1</sup>H NMR and <sup>13</sup>C NMR of compound 3ea

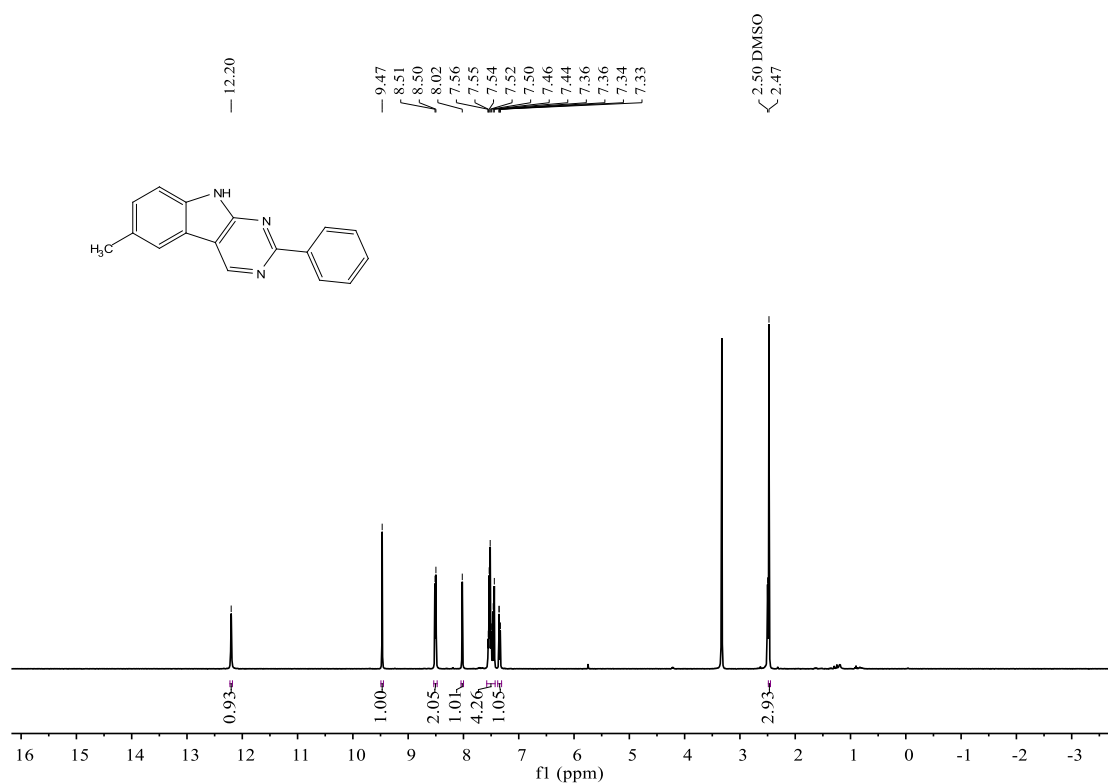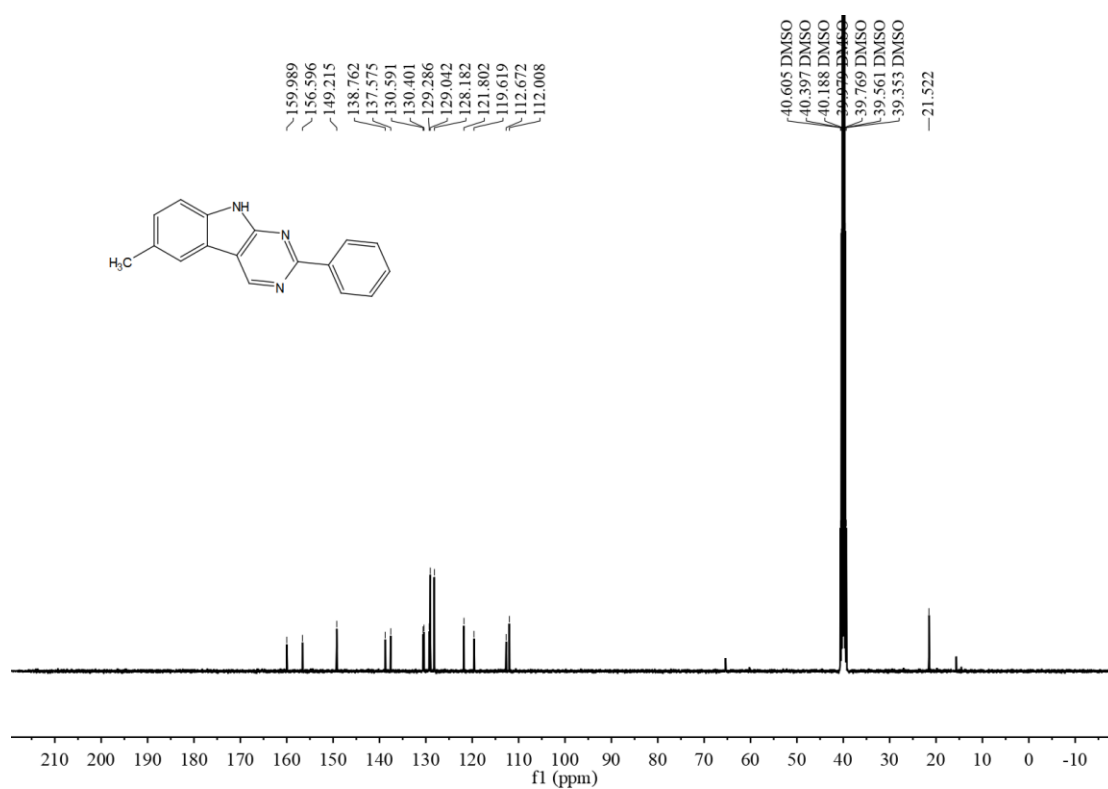

<sup>1</sup>H NMR, <sup>13</sup>C NMR and <sup>19</sup>F NMR of compound 3fa

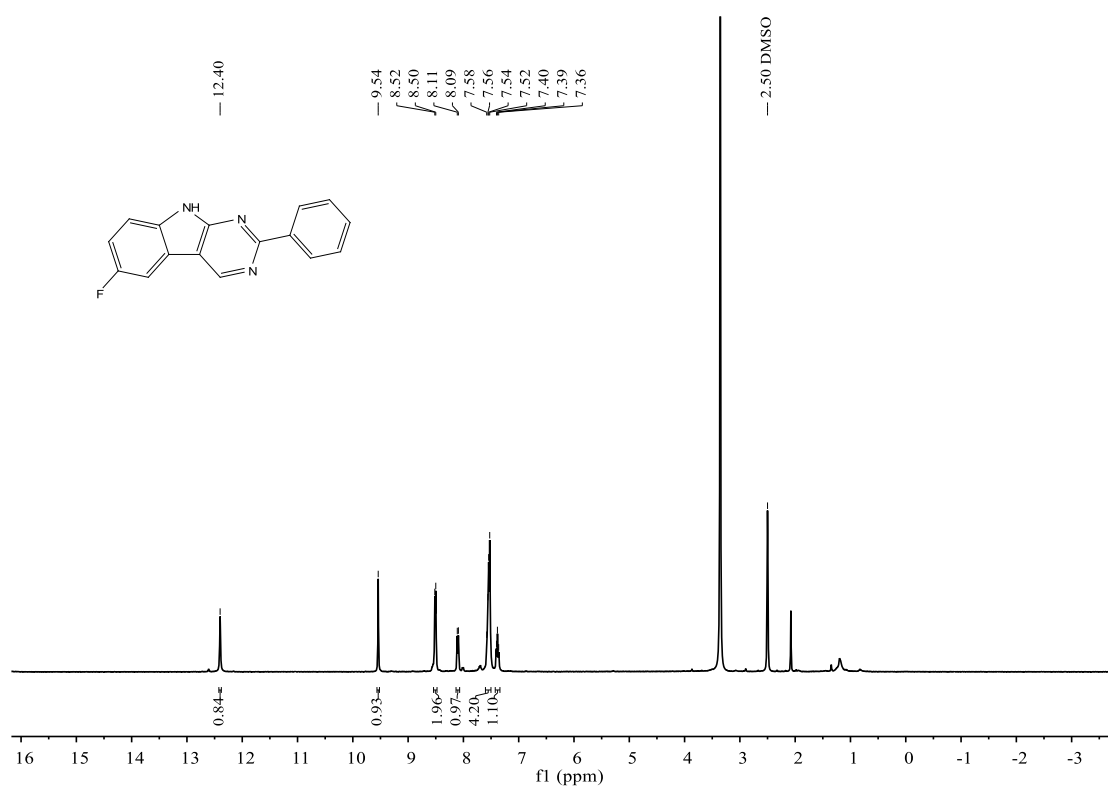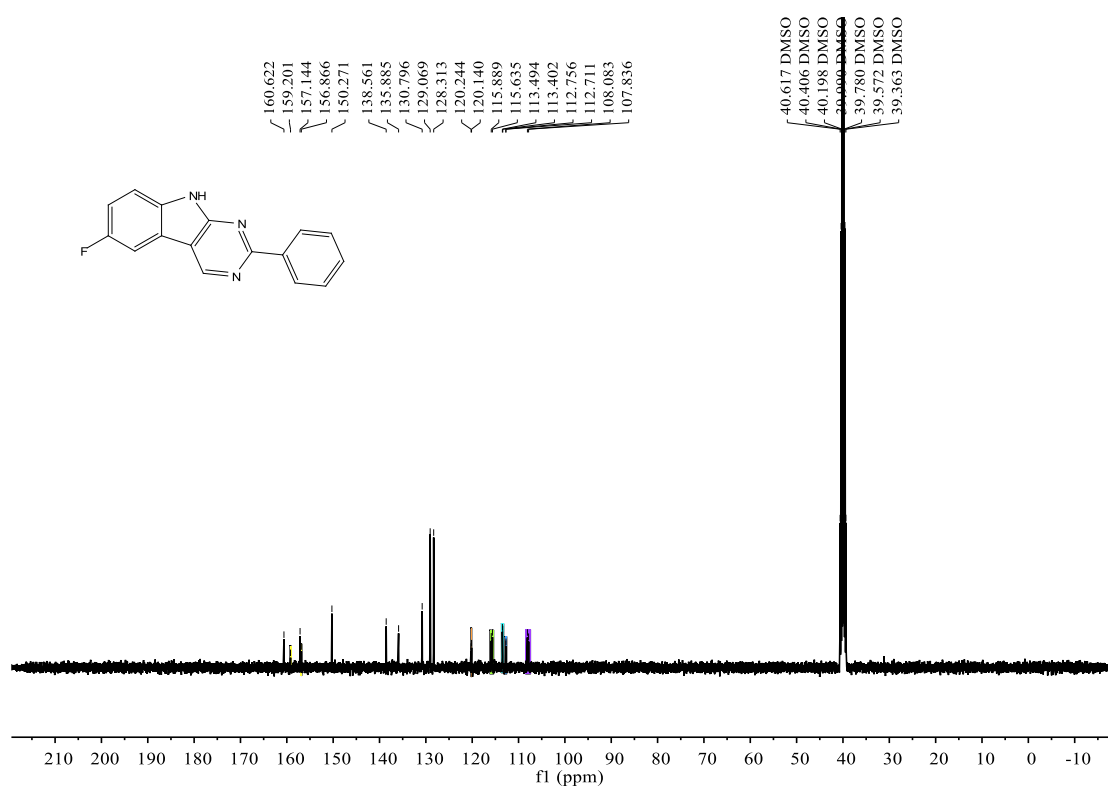

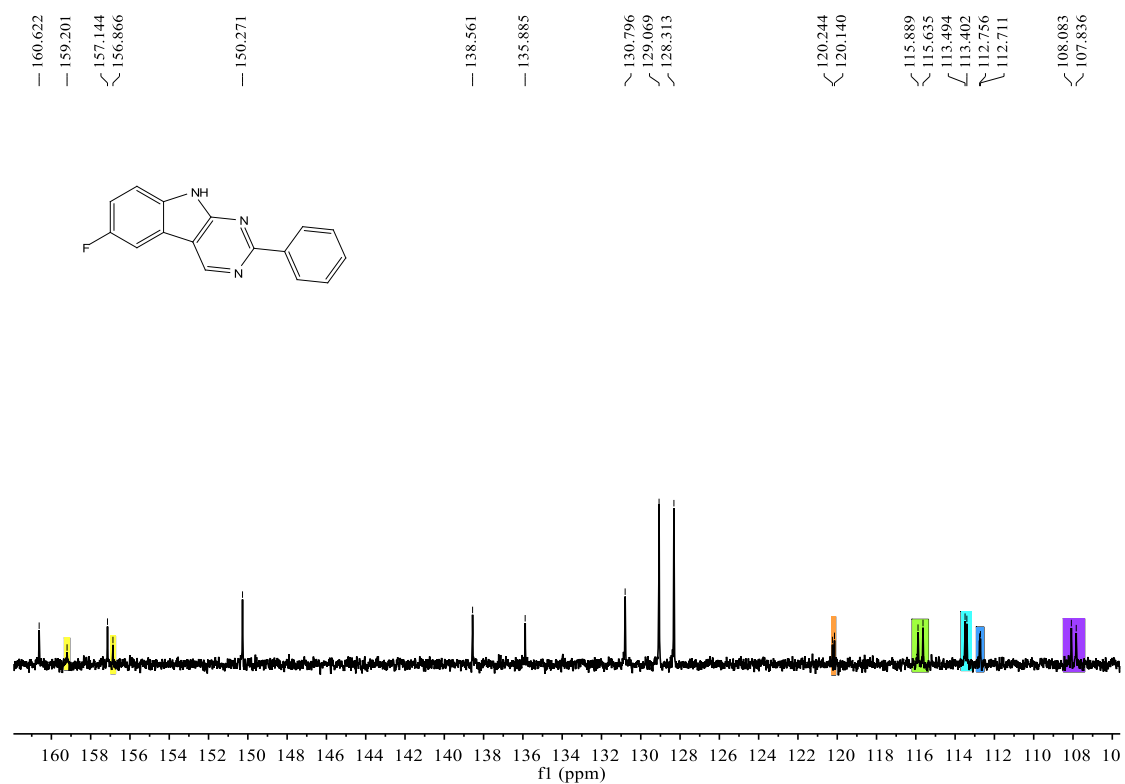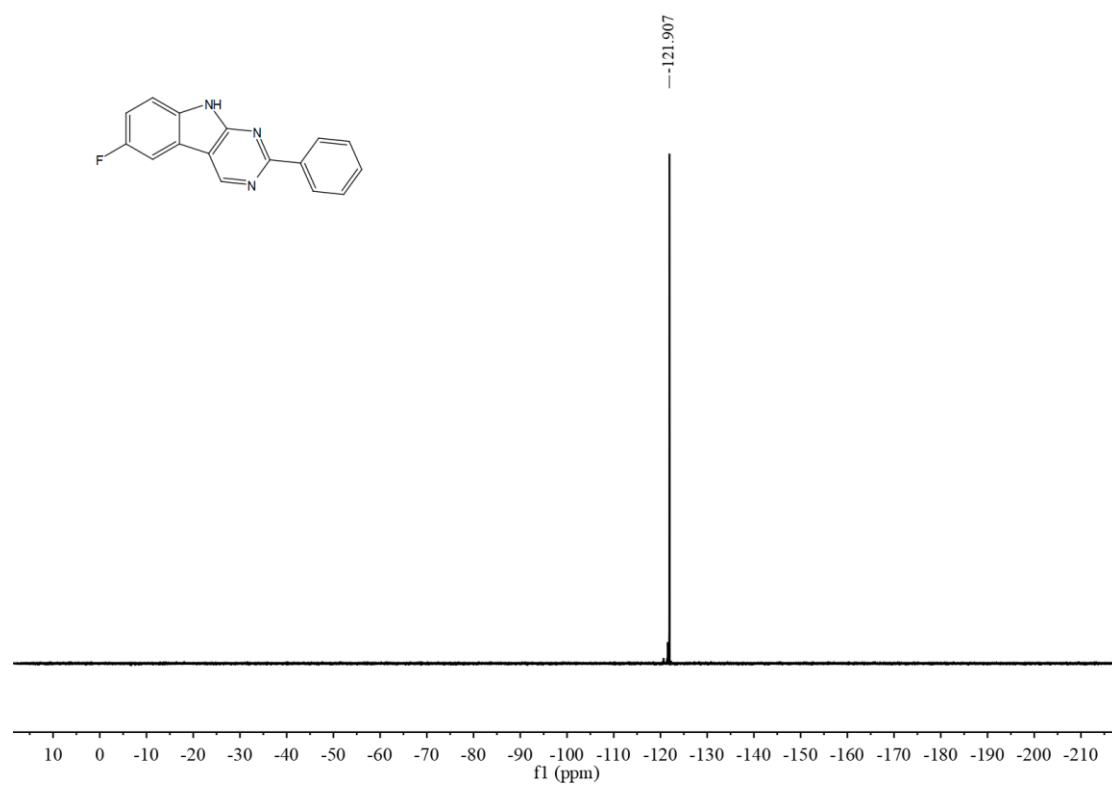

# <sup>1</sup>H NMR and <sup>13</sup>C NMR of compound 3ga

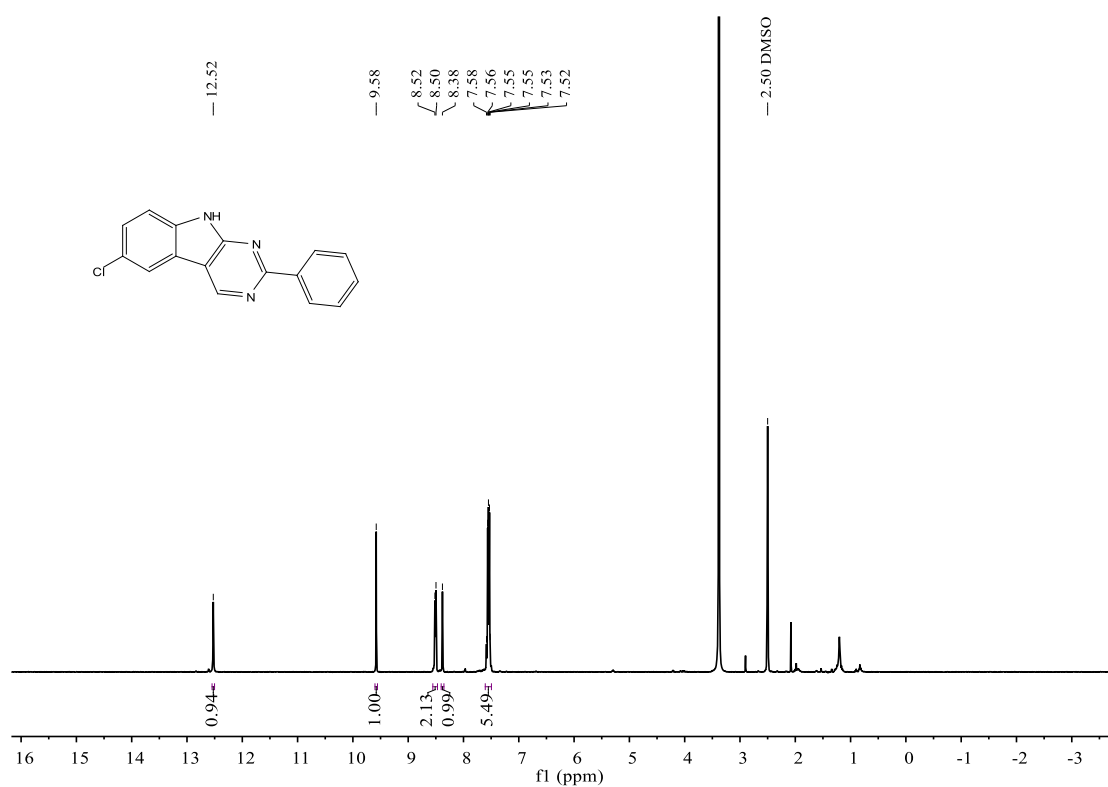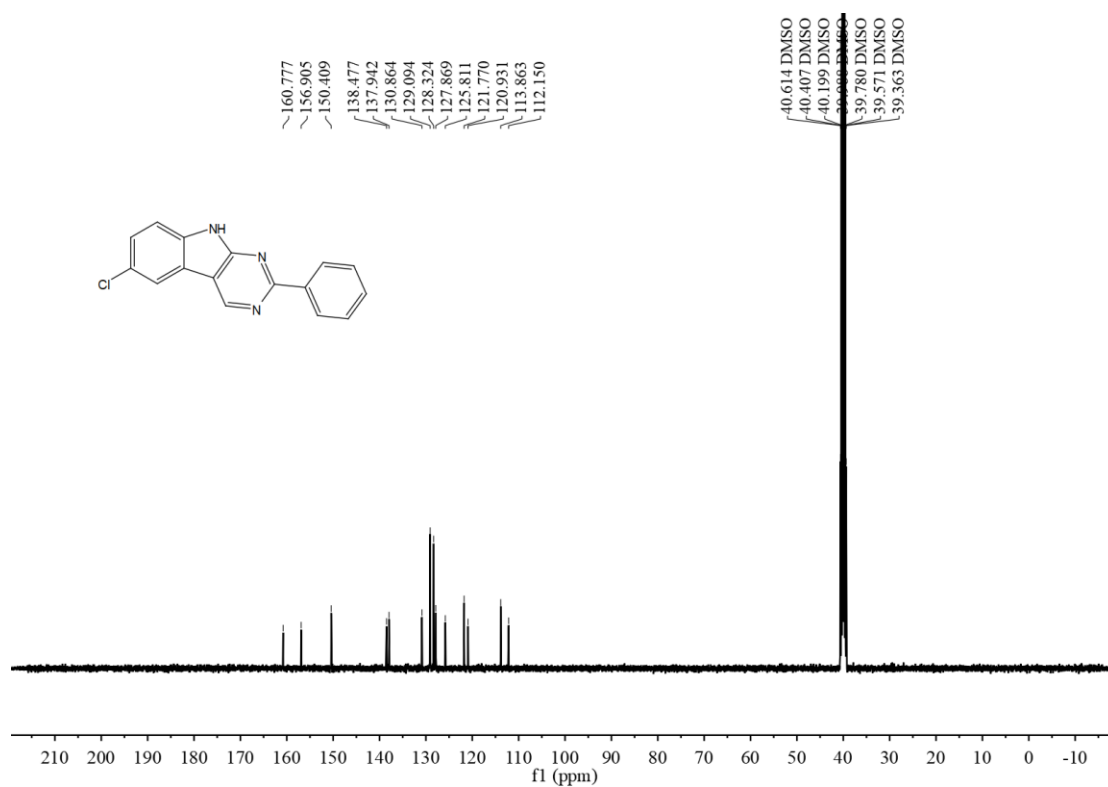

# <sup>1</sup>H NMR and <sup>13</sup>C NMR of compound 3ha

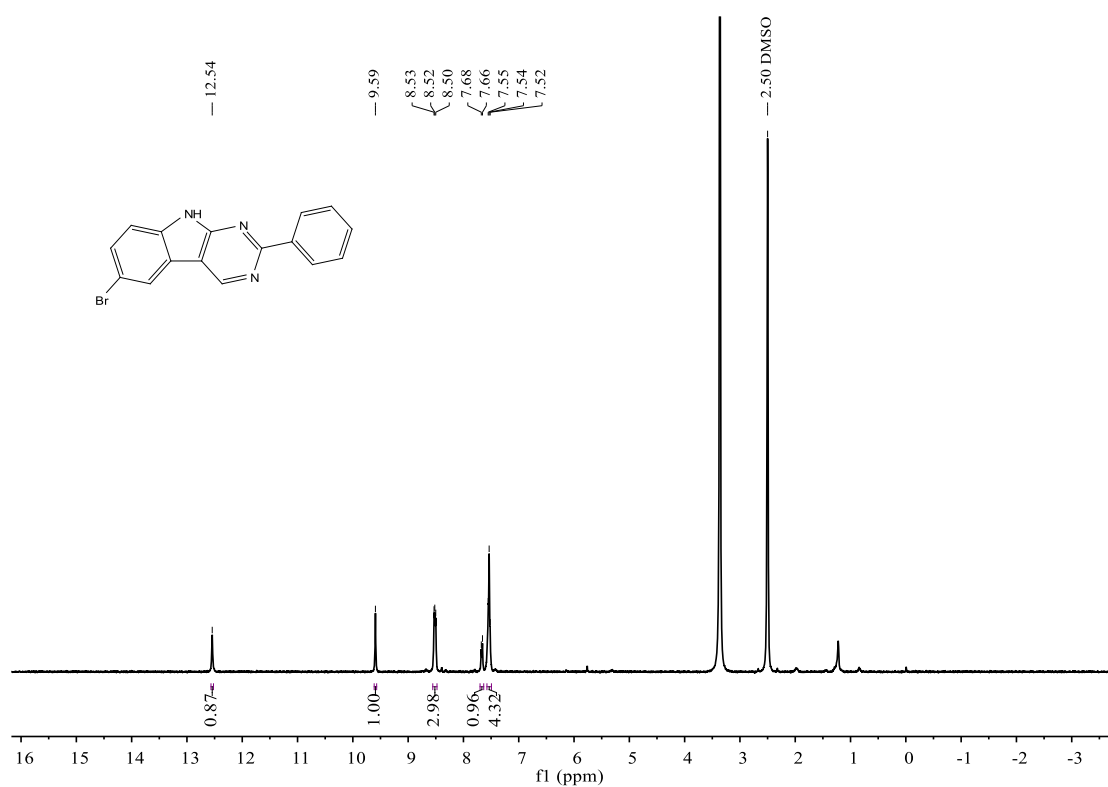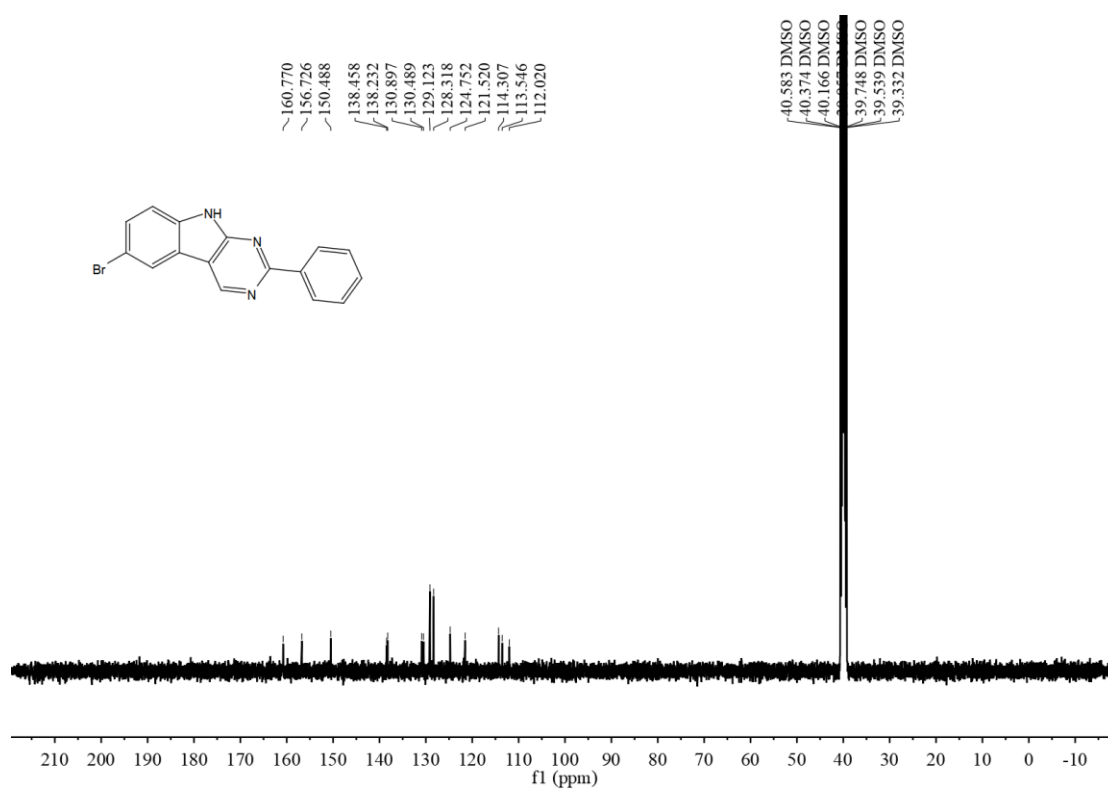

# <sup>1</sup>H NMR and <sup>13</sup>C NMR of compound 3ia

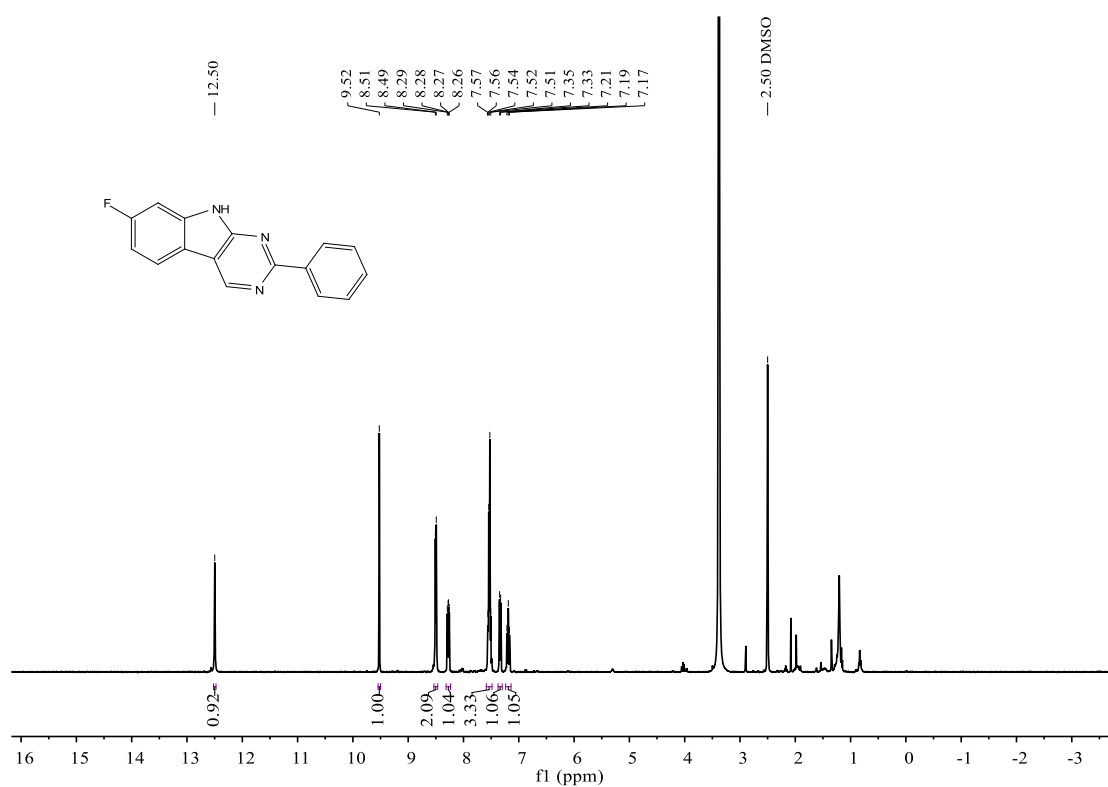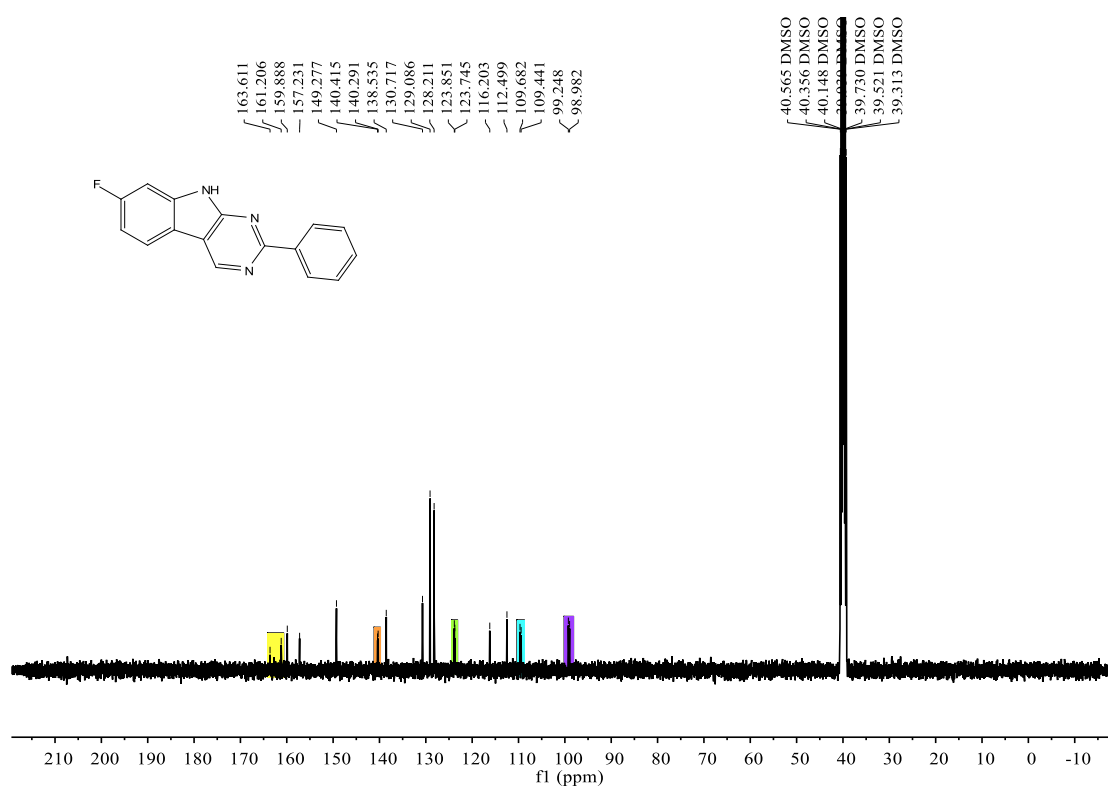

# <sup>1</sup>H NMR and <sup>13</sup>C NMR of compound 3ja

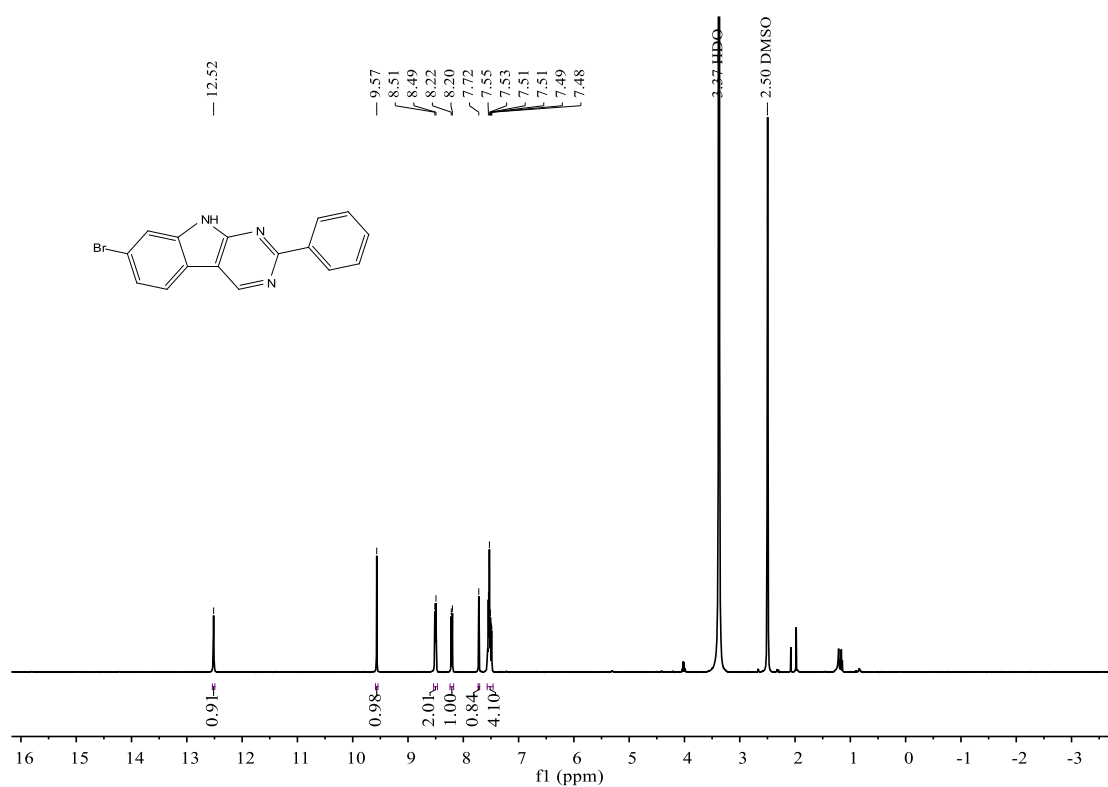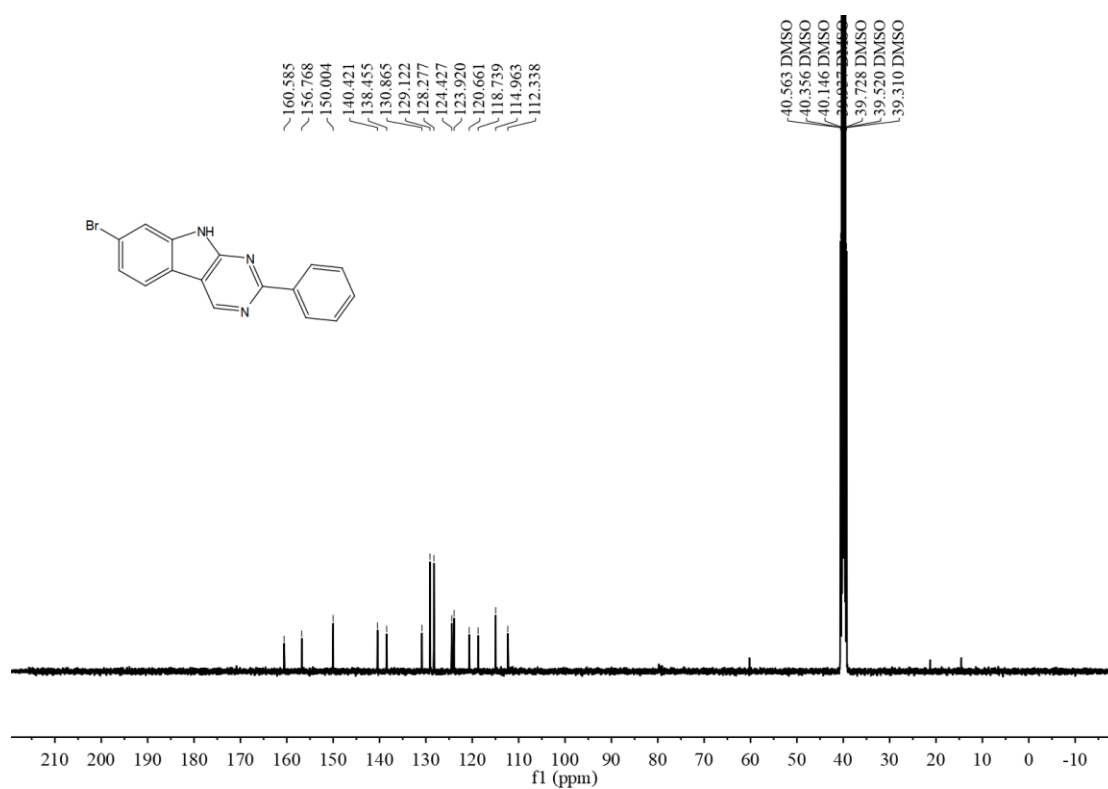

# <sup>1</sup>H NMR and <sup>13</sup>C NMR of compound 3ka

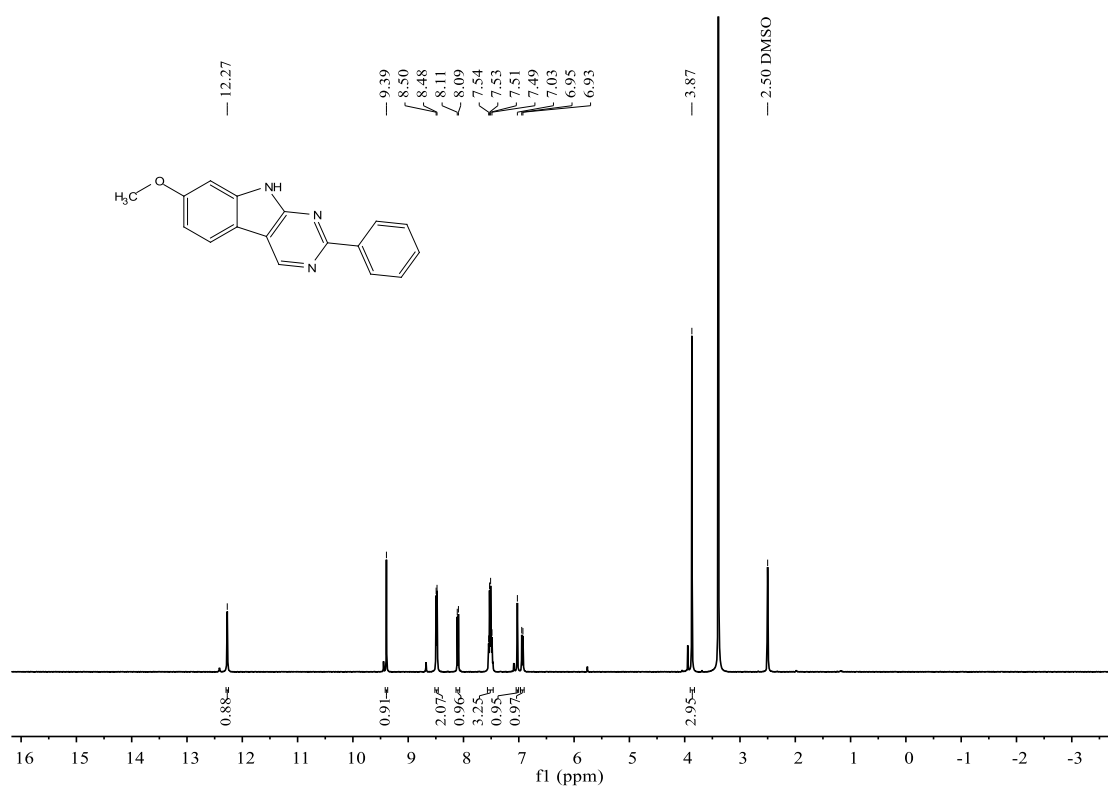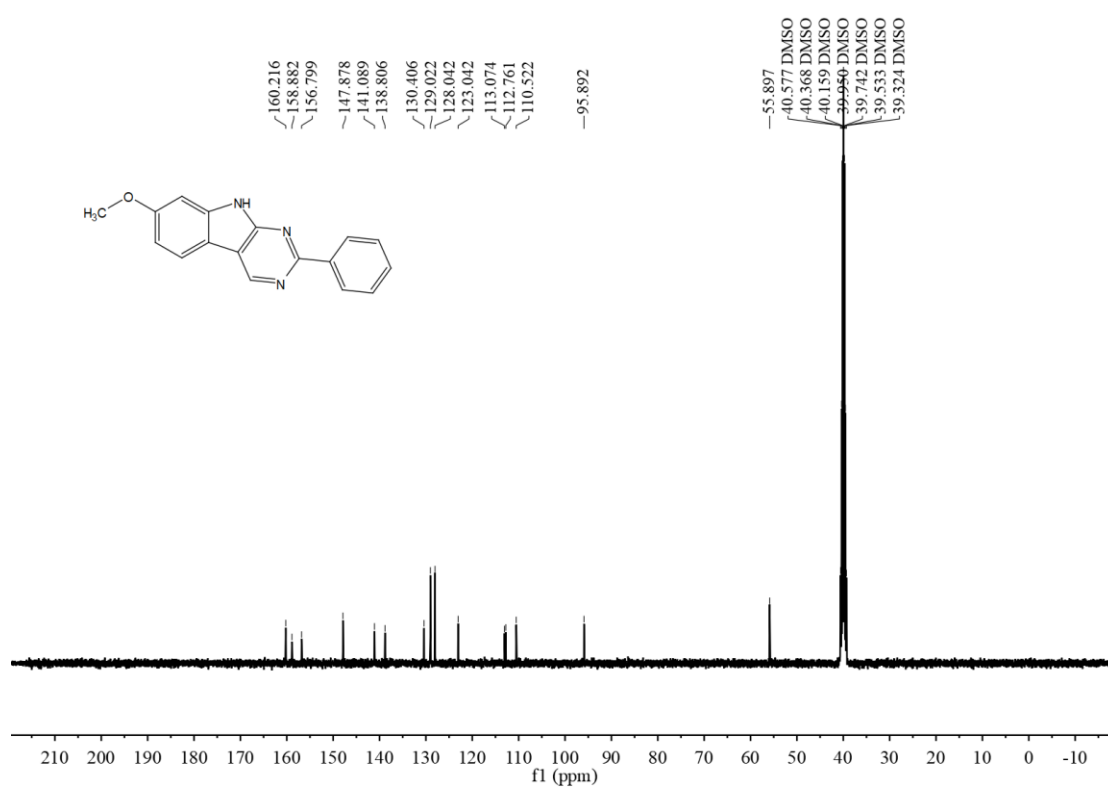

# <sup>1</sup>H NMR and <sup>13</sup>C NMR of compound 3la

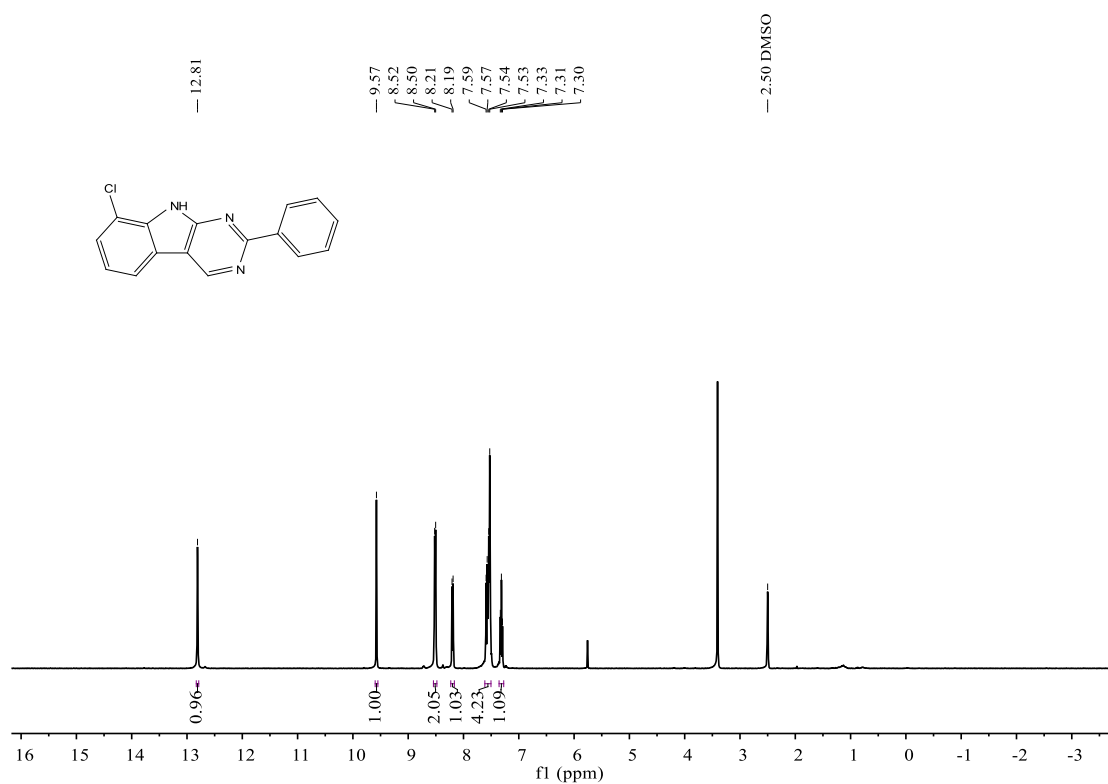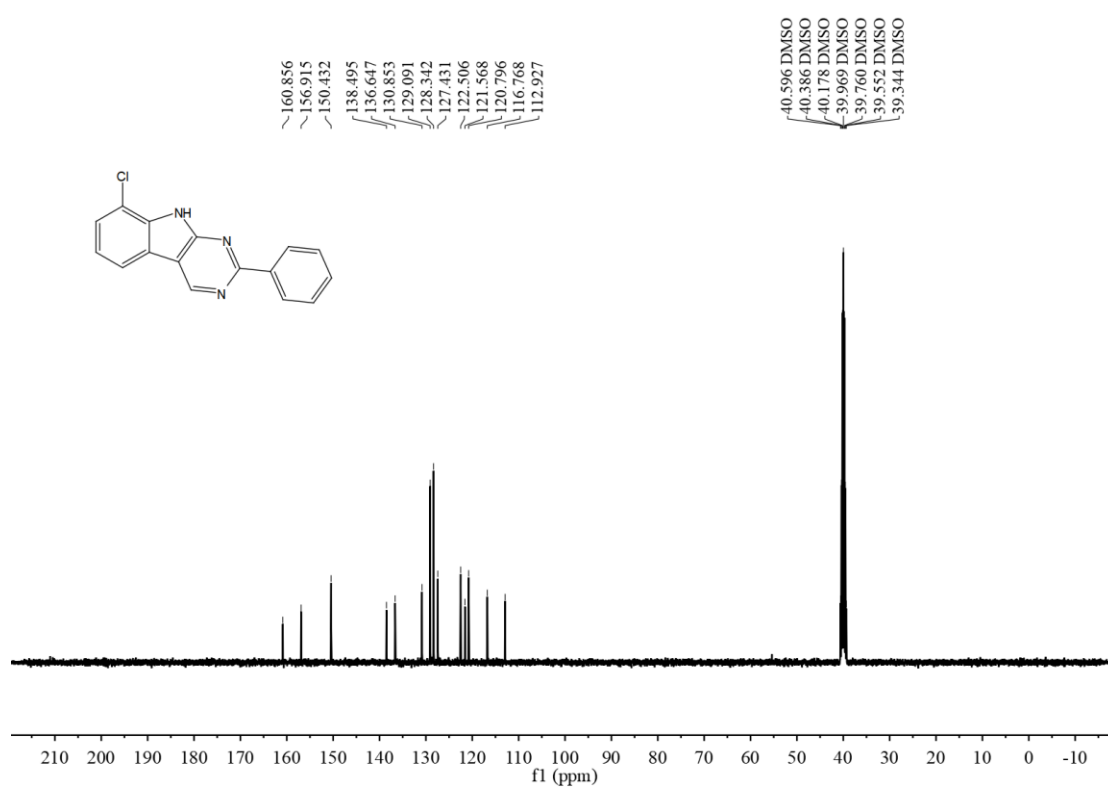

# <sup>1</sup>H NMR and <sup>13</sup>C NMR of compound 3ma

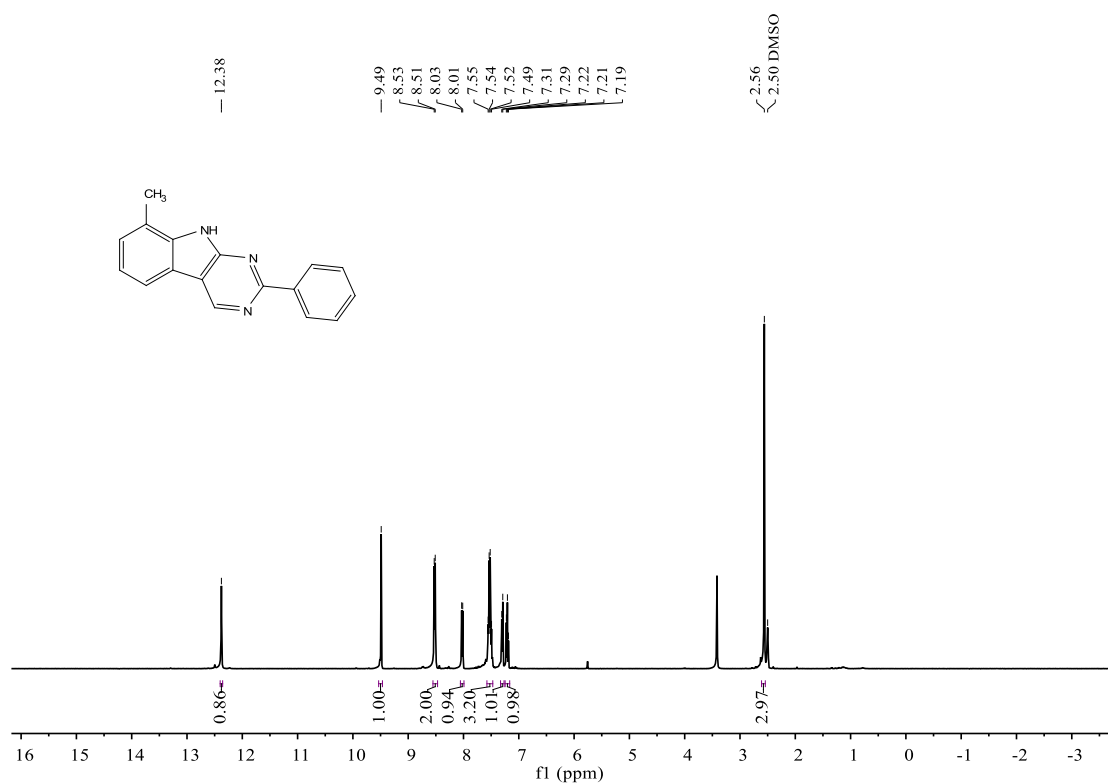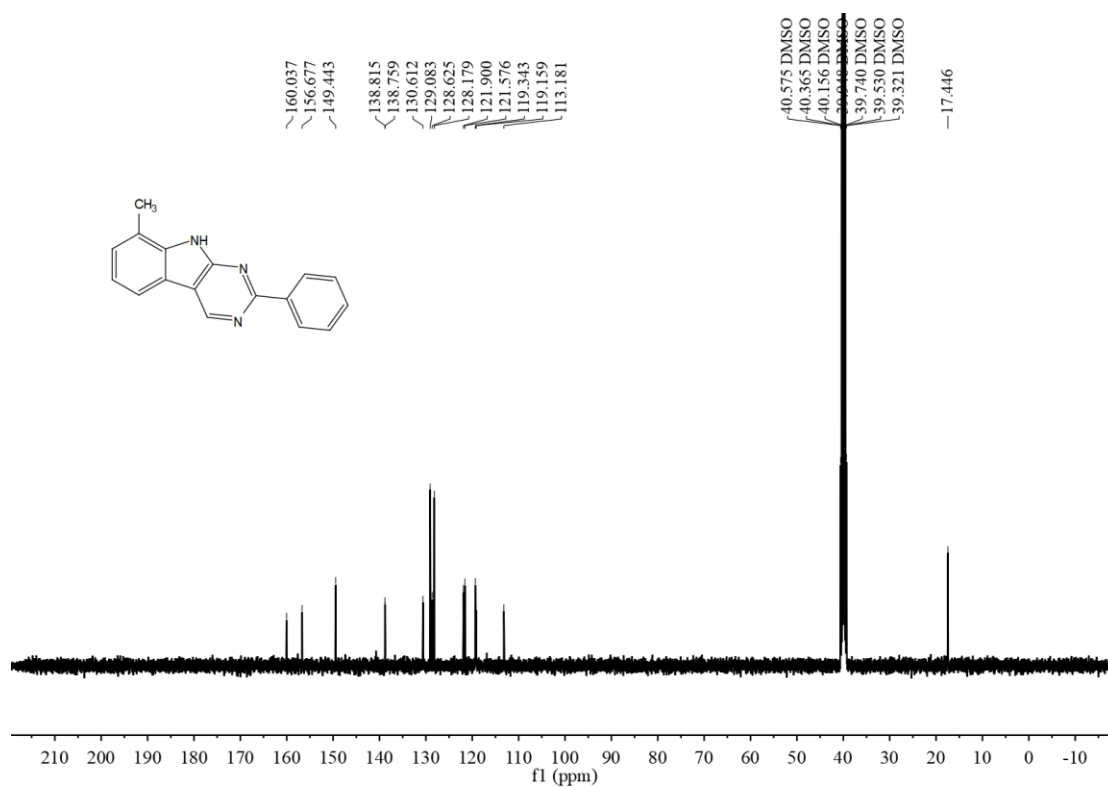

# <sup>1</sup>H NMR and <sup>13</sup>C NMR of compound 3na

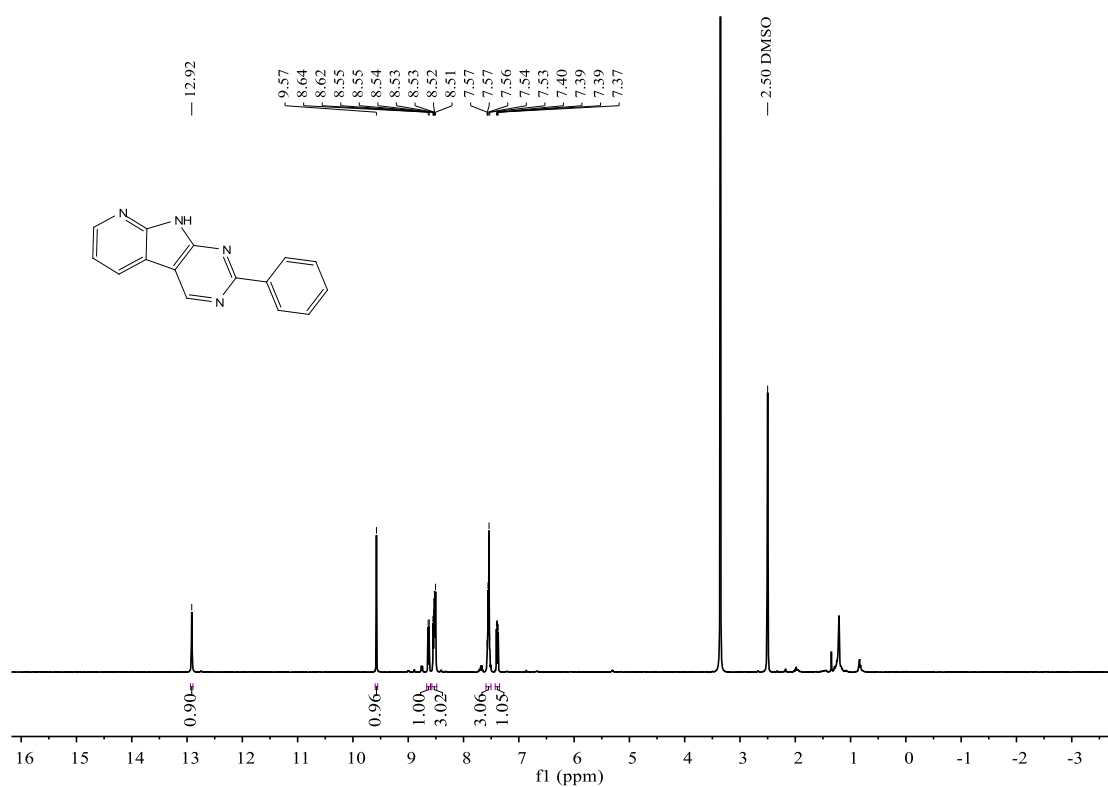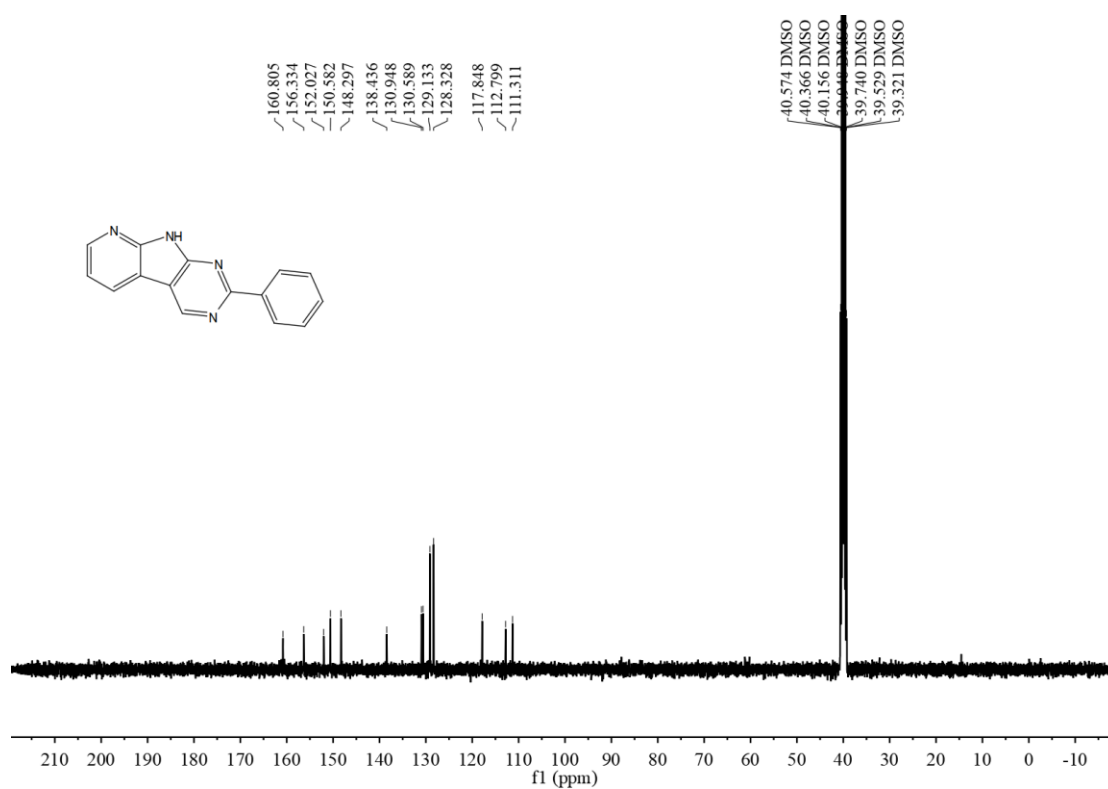

# <sup>1</sup>H NMR and <sup>13</sup>C NMR of compound 3ab

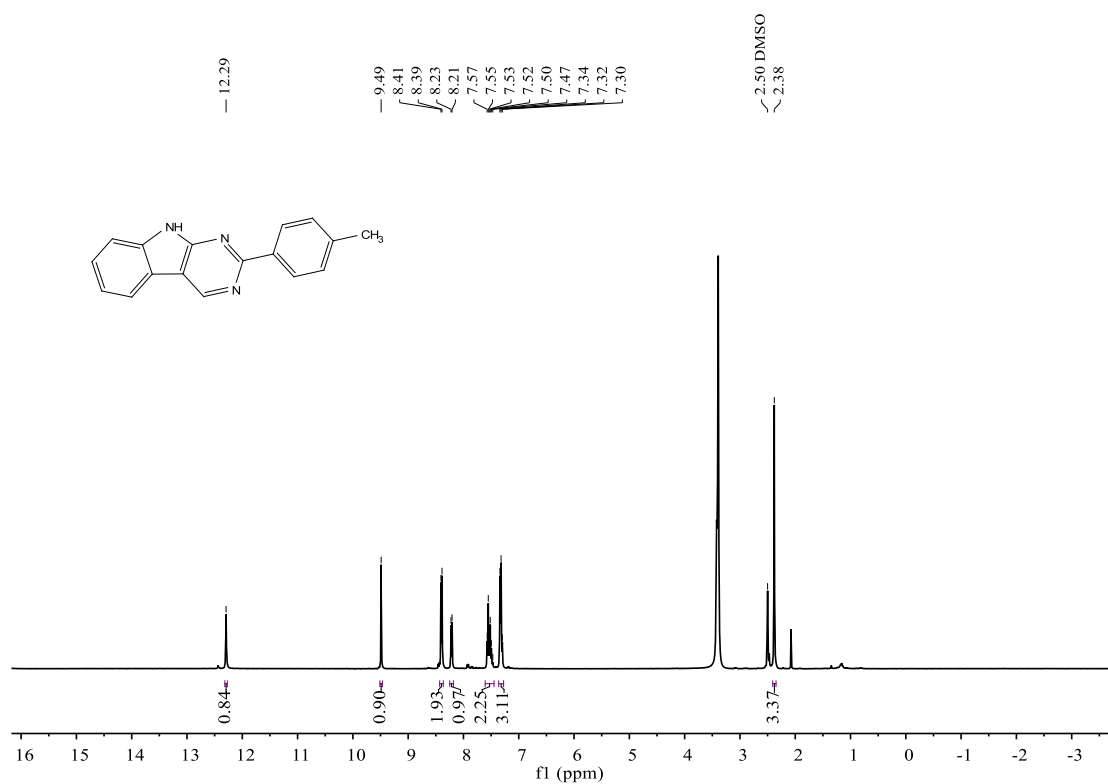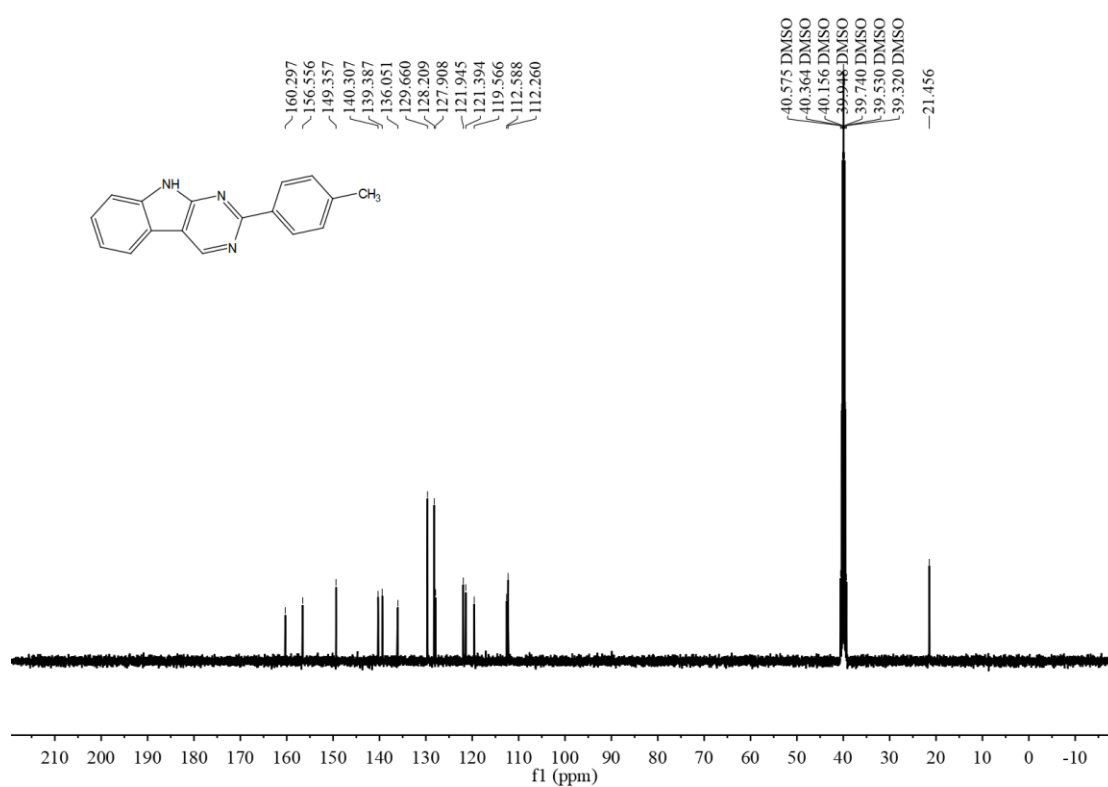

# <sup>1</sup>H NMR and <sup>13</sup>C NMR of compound 3ac

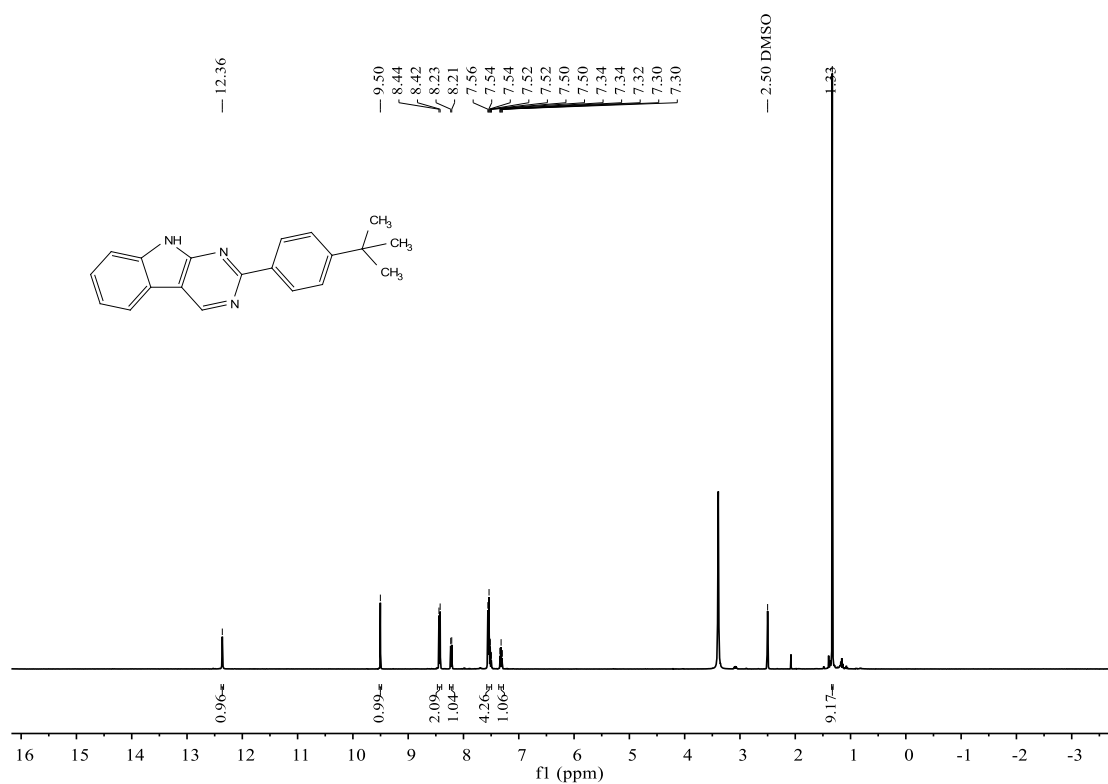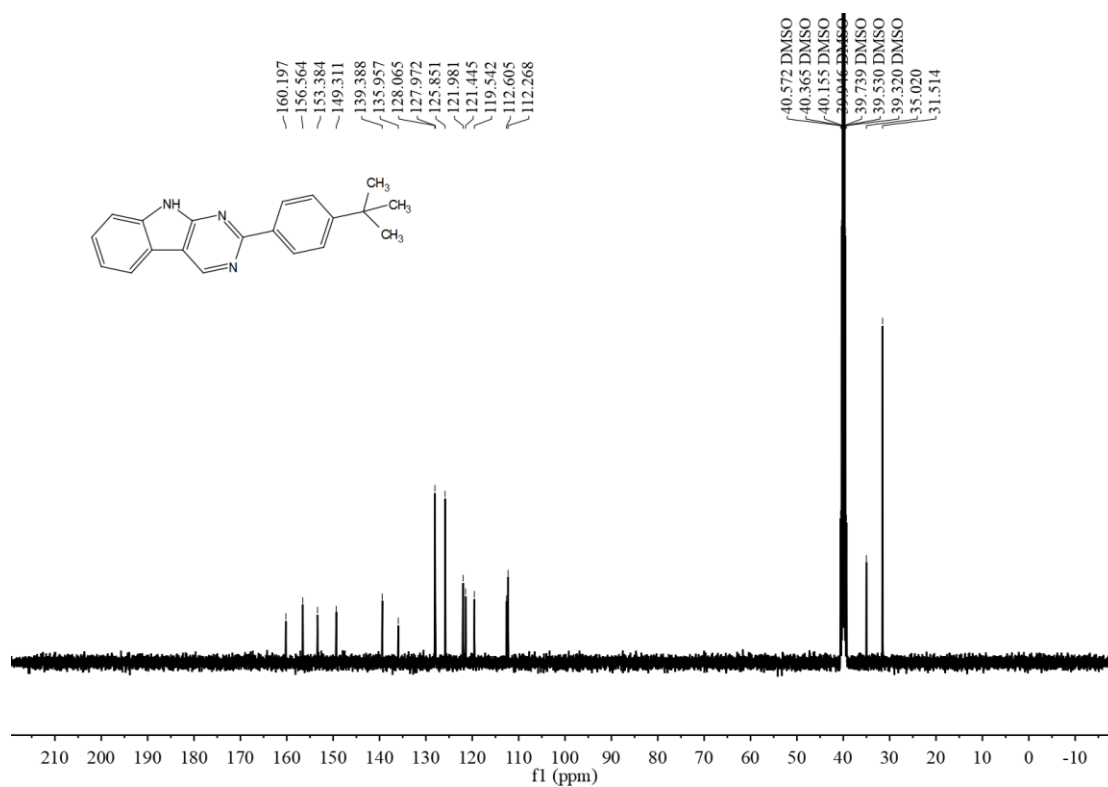

# <sup>1</sup>H NMR and <sup>13</sup>C NMR of compound 3ad

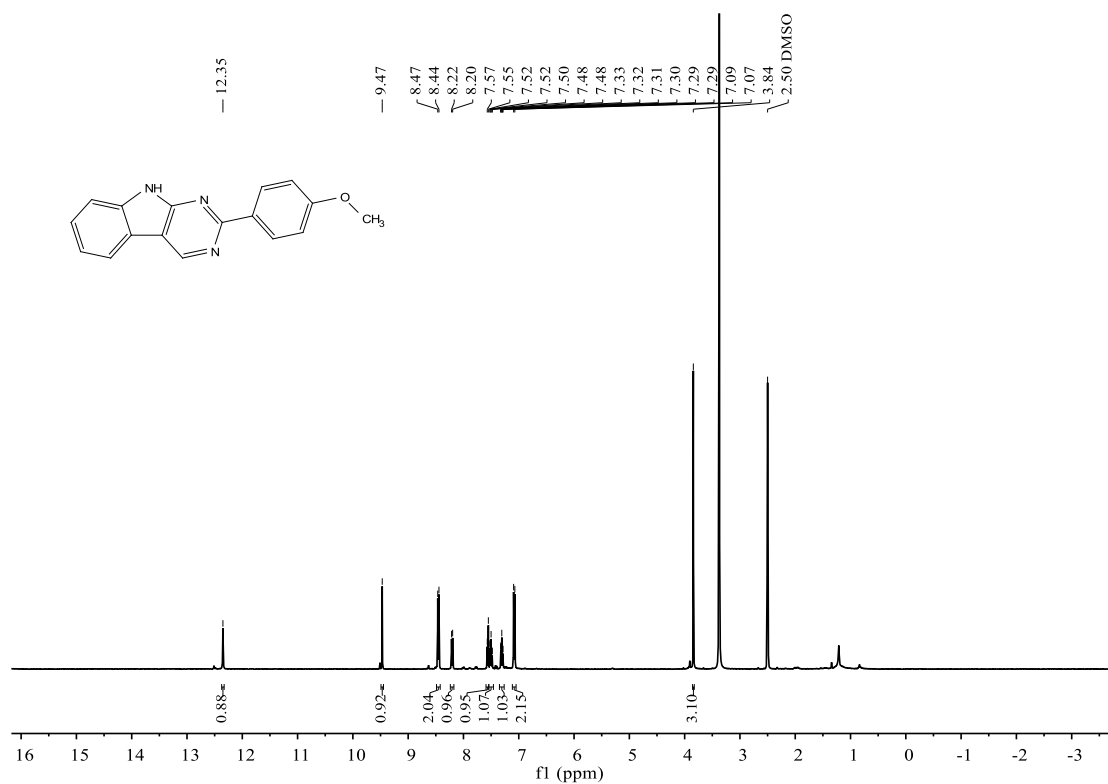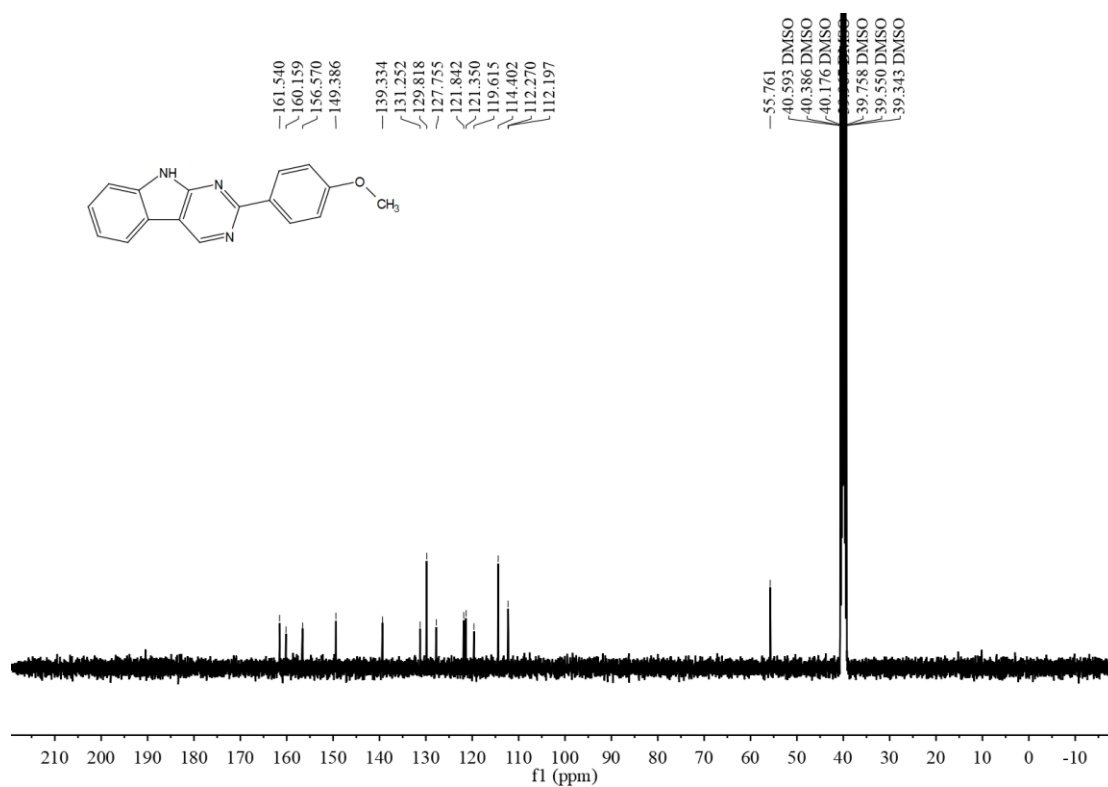

# <sup>1</sup>H NMR and <sup>13</sup>C NMR of compound 3ae

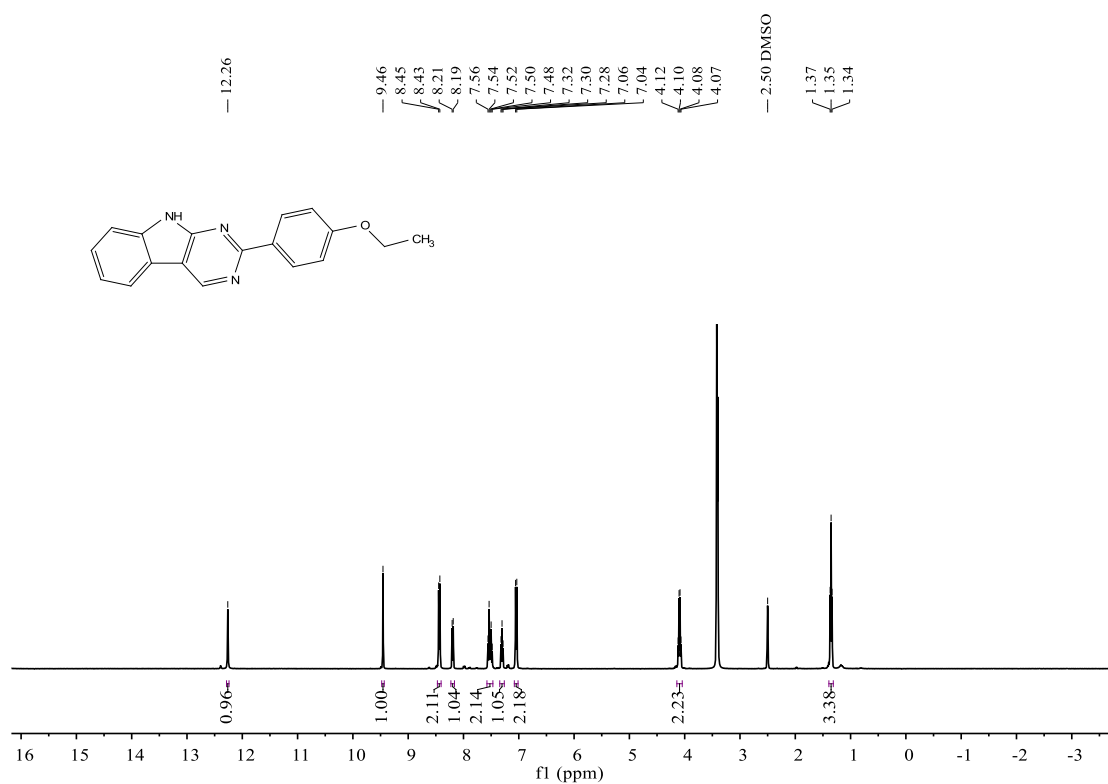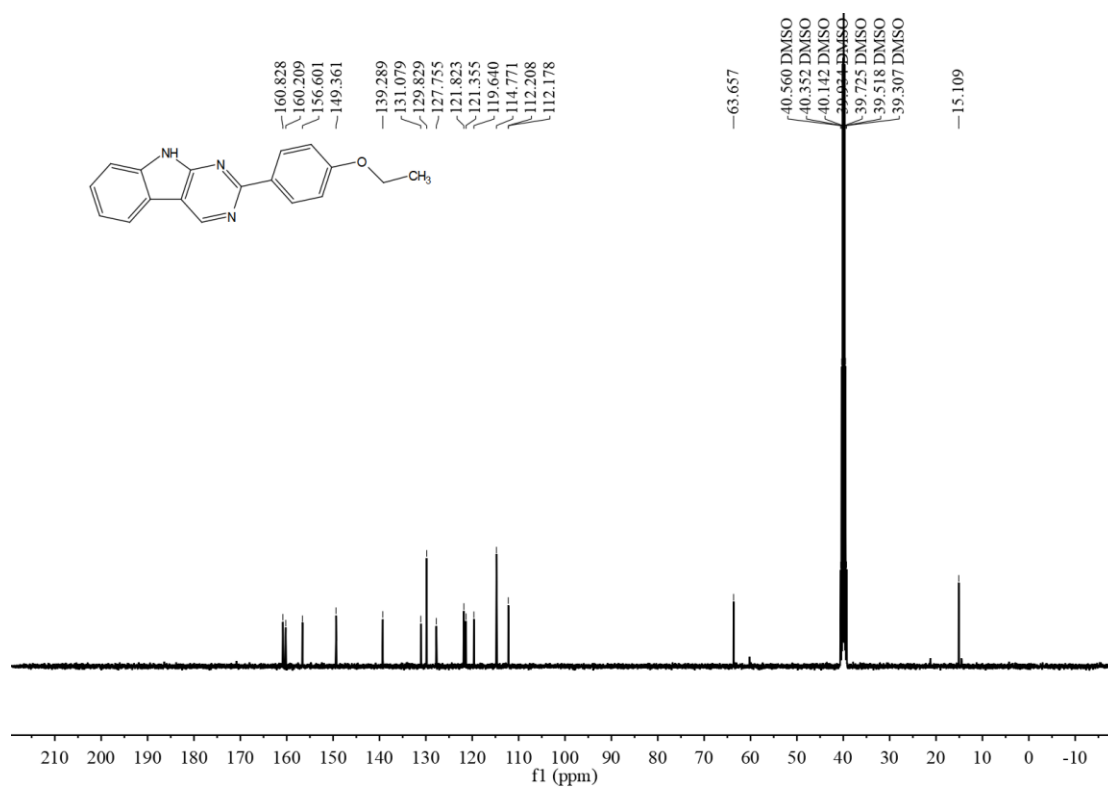

<sup>1</sup>H NMR, <sup>13</sup>C NMR and <sup>19</sup>F NMR of compound 3af

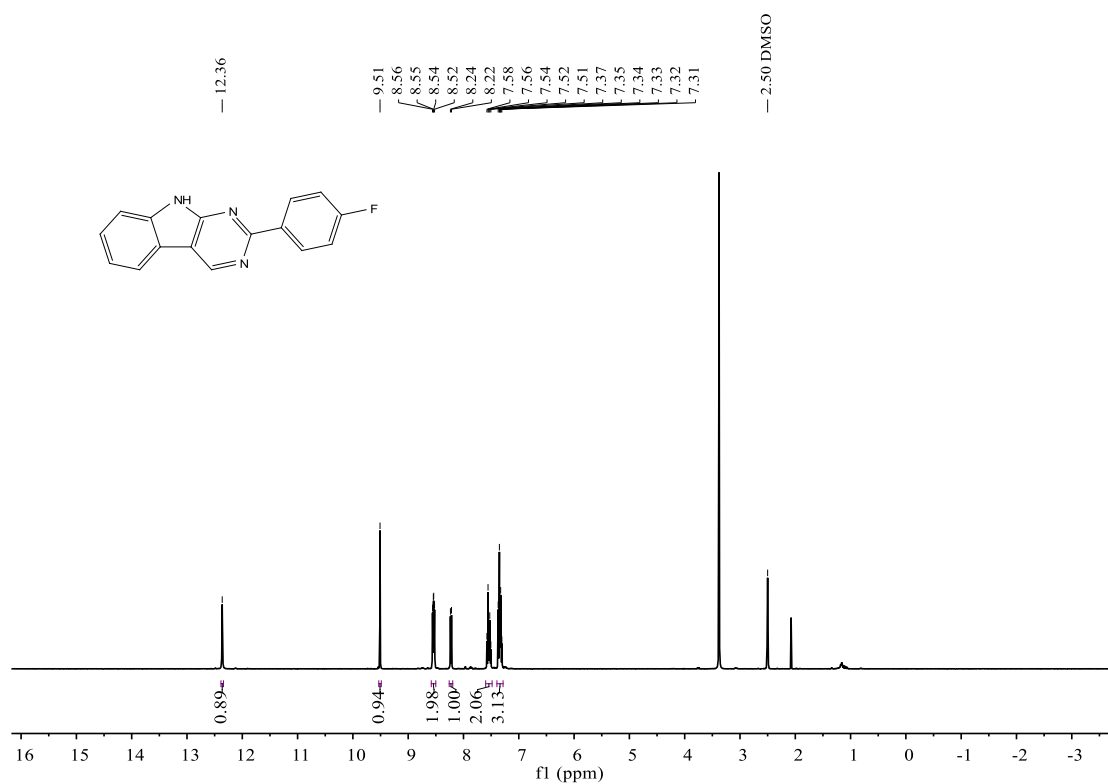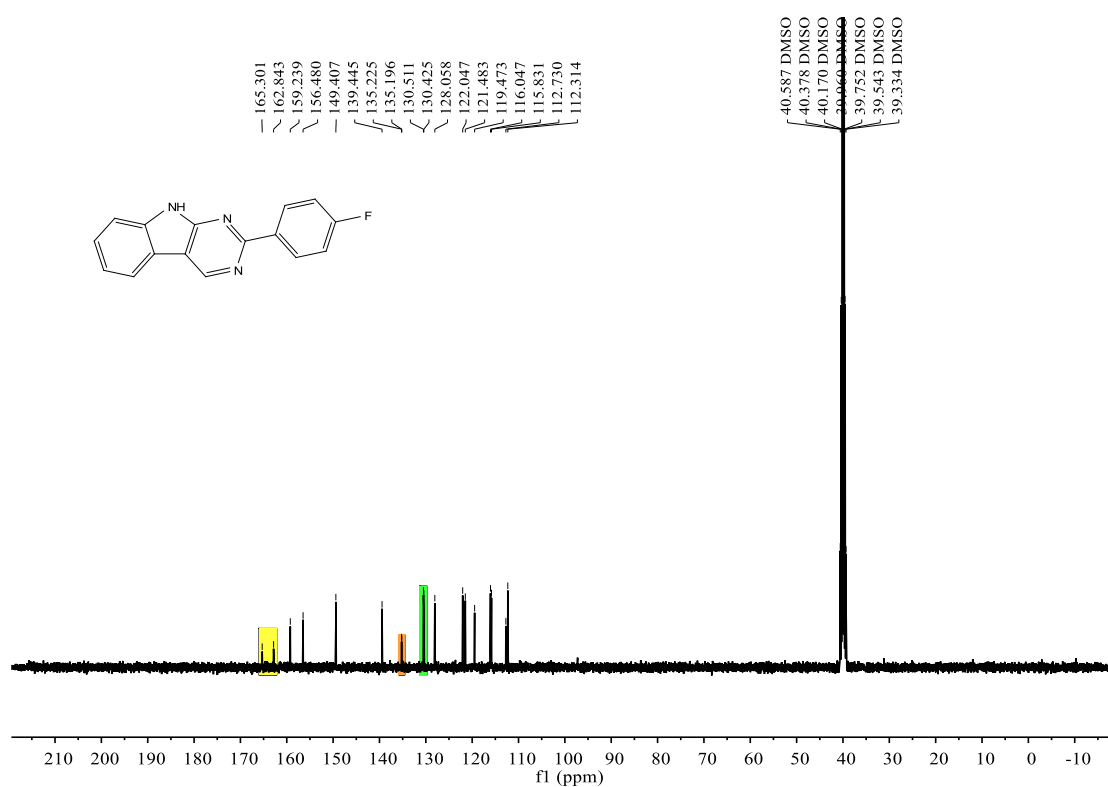

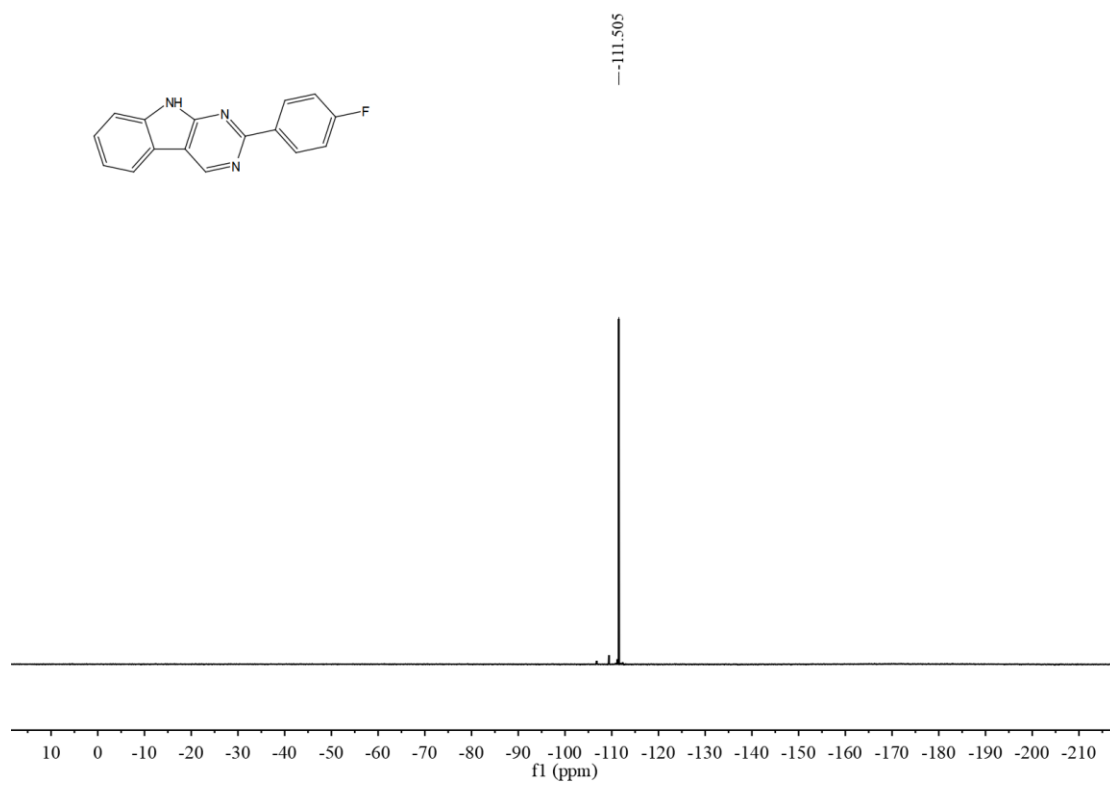

# <sup>1</sup>H NMR and <sup>13</sup>C NMR of compound 3ag

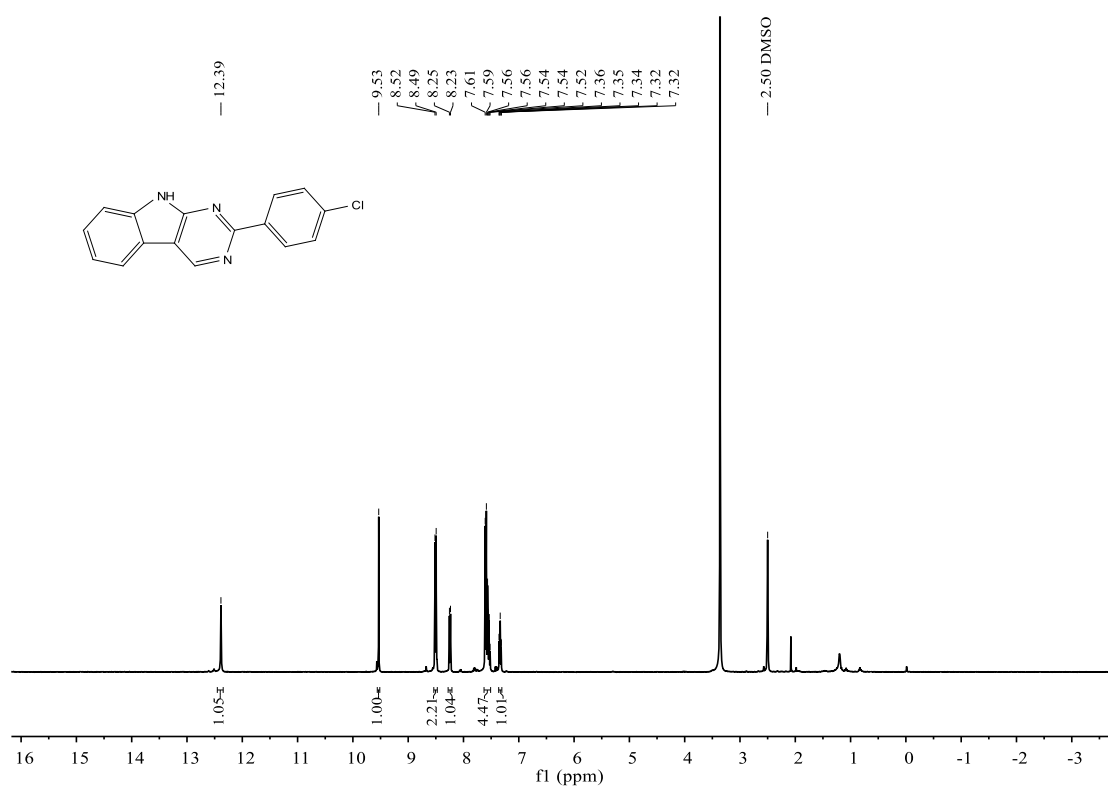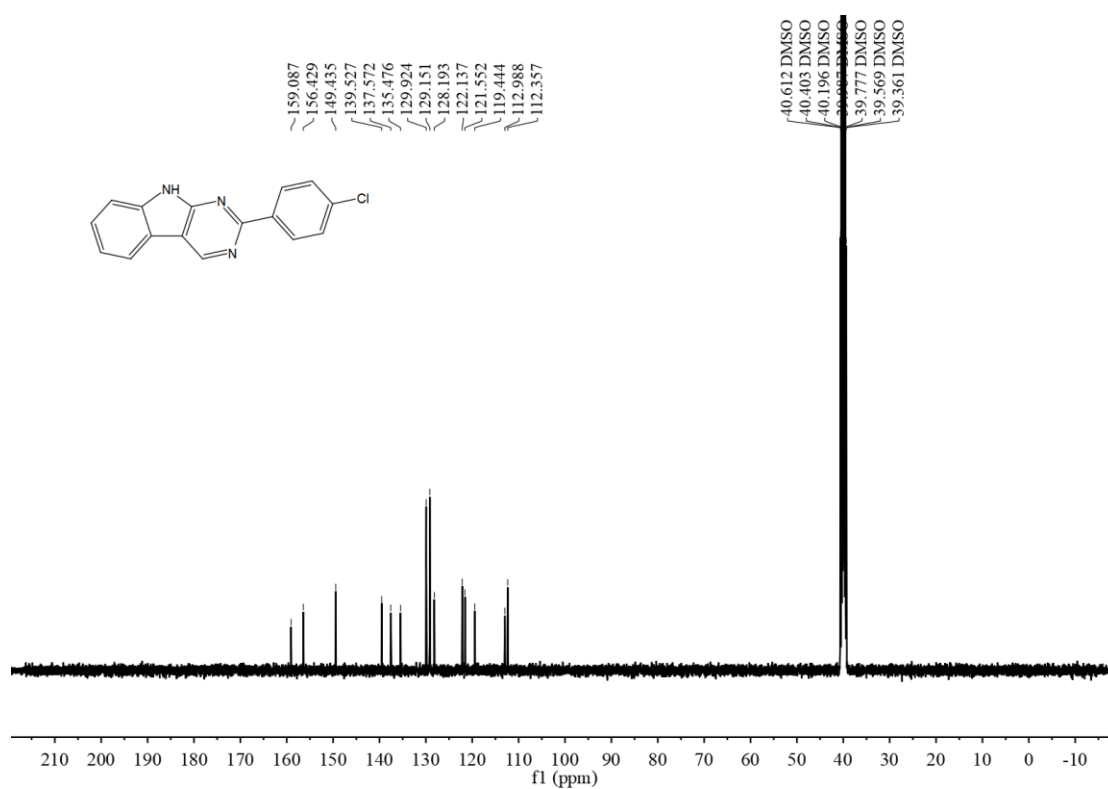

# <sup>1</sup>H NMR and <sup>13</sup>C NMR of compound 3ah

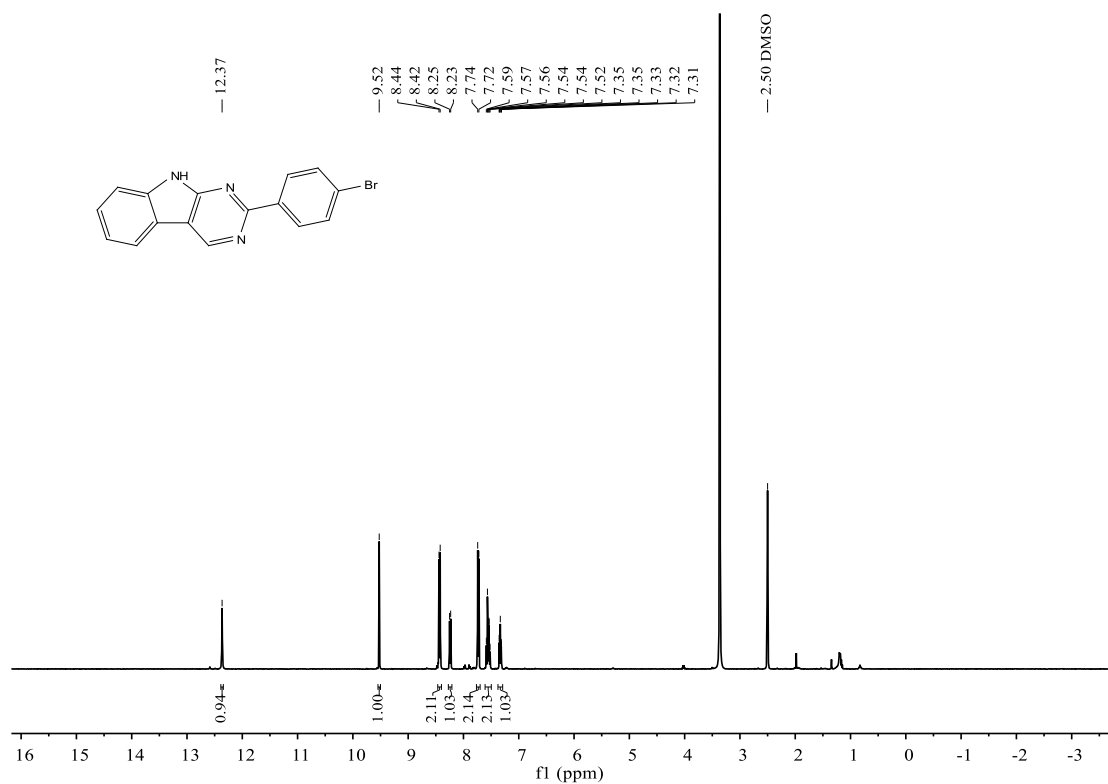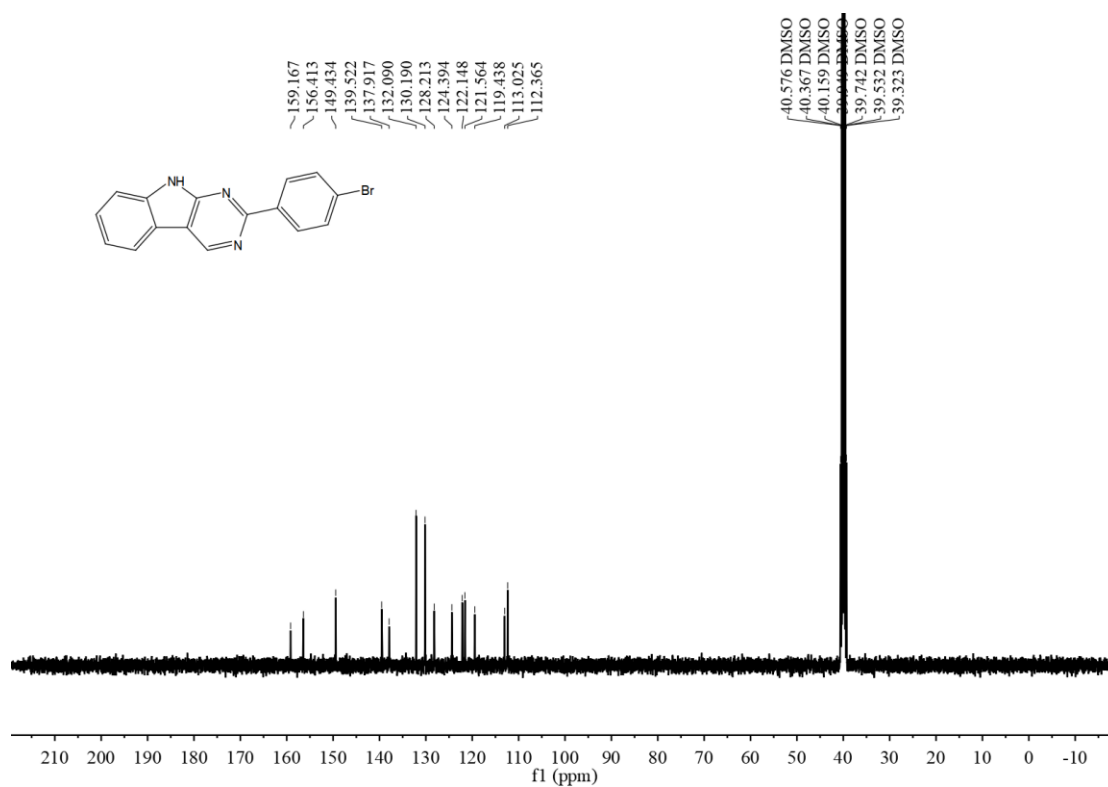

<sup>1</sup>H NMR, <sup>13</sup>C NMR and <sup>19</sup>F NMR of compound 3ai

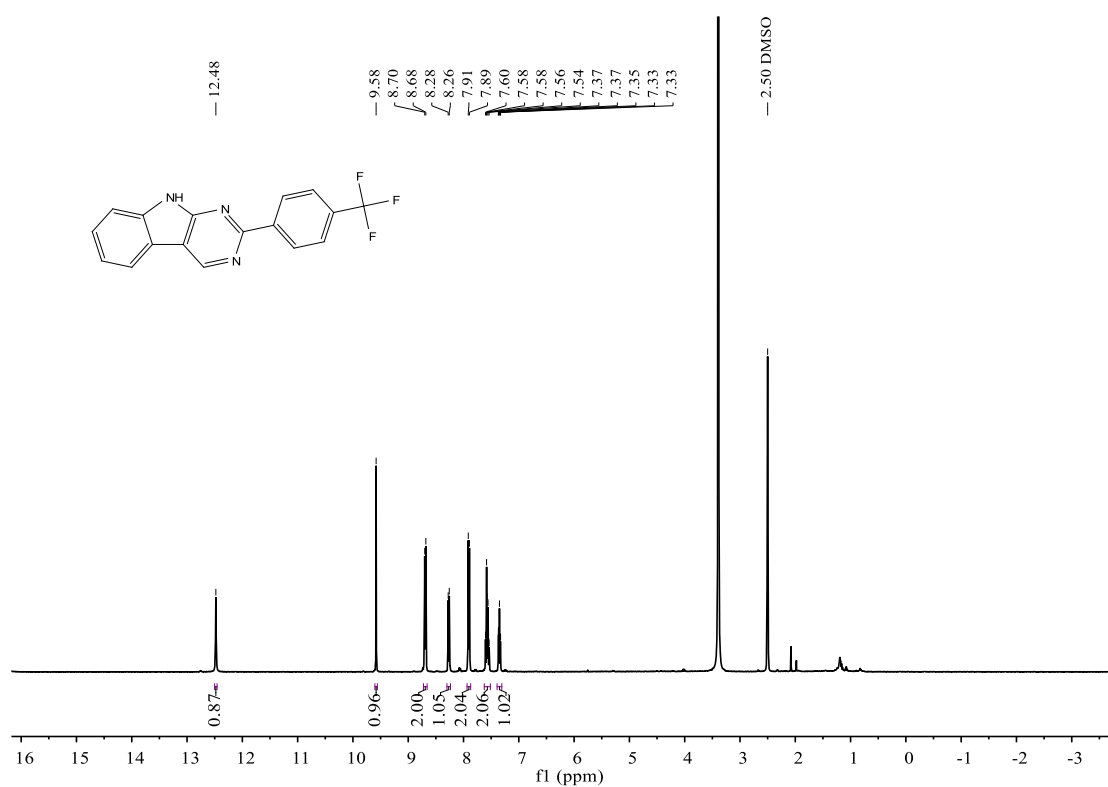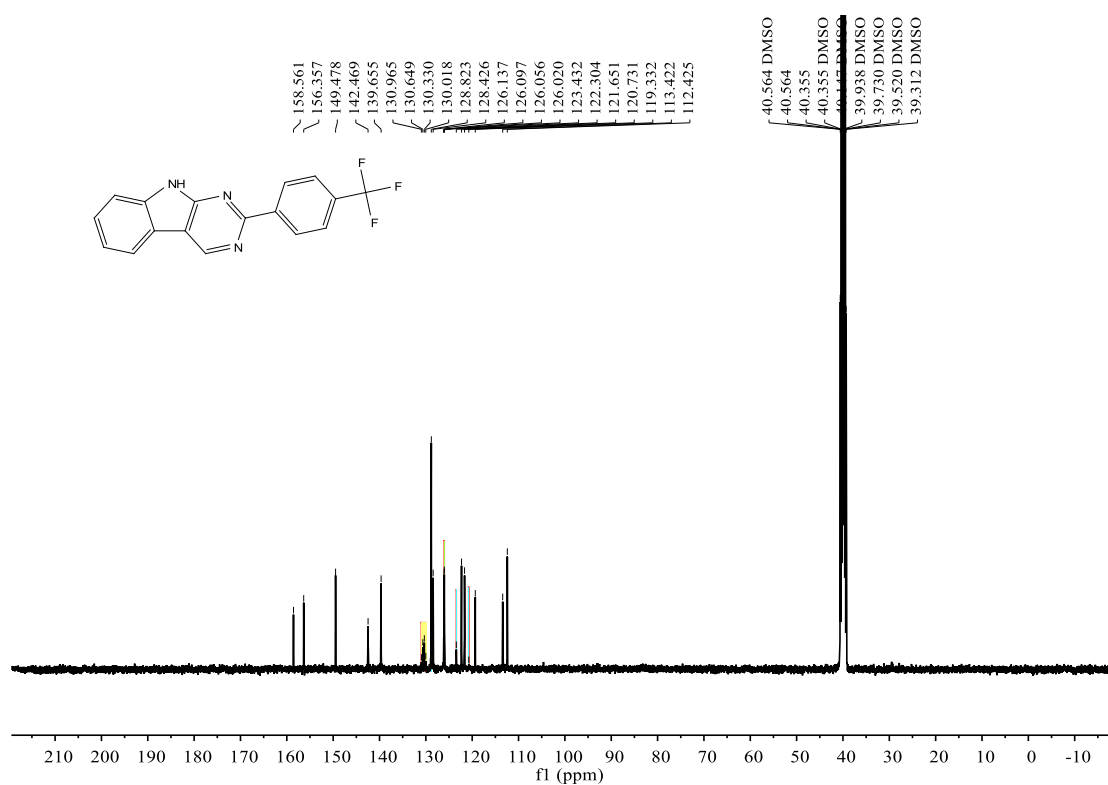

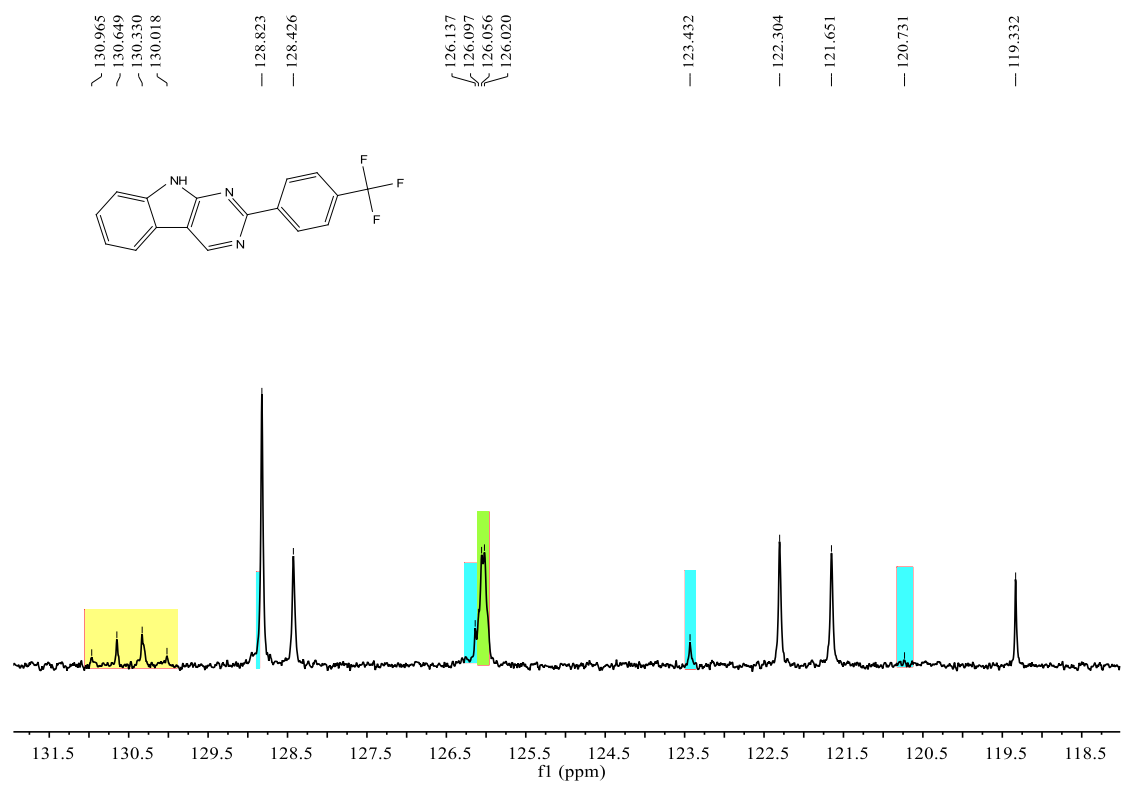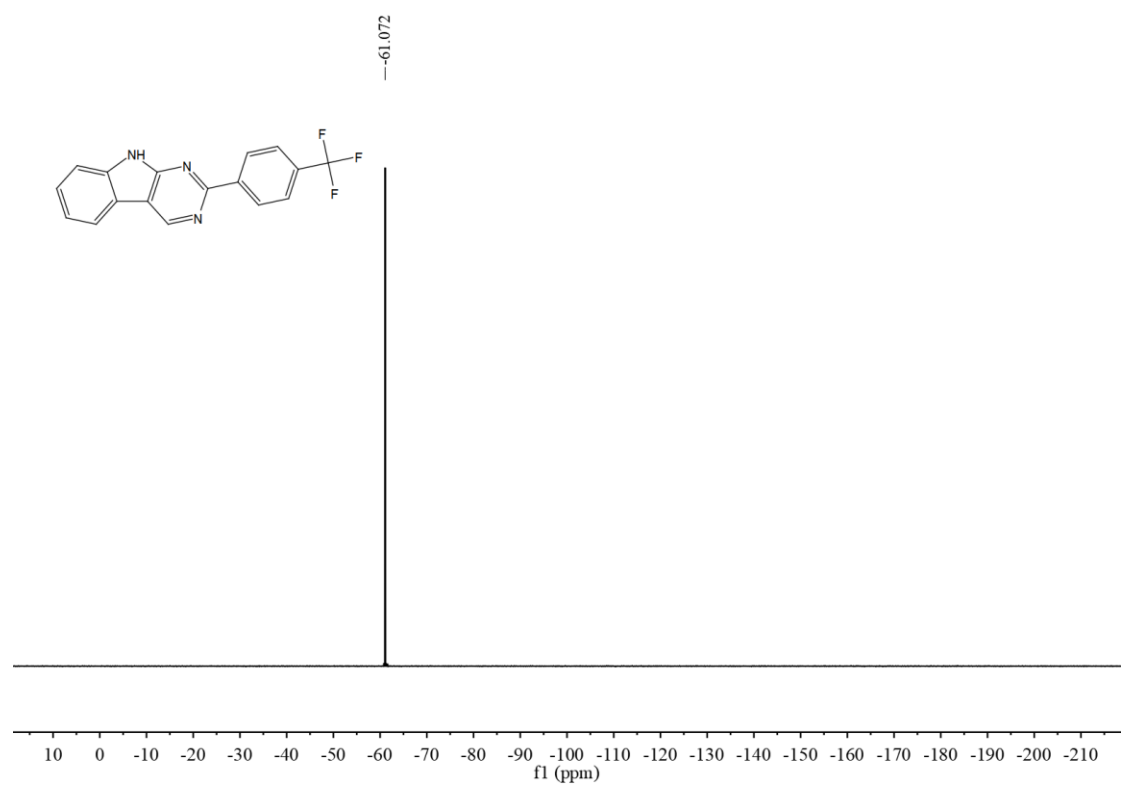

<sup>1</sup>H NMR, <sup>13</sup>C NMR and <sup>19</sup>F NMR of compound 3aj

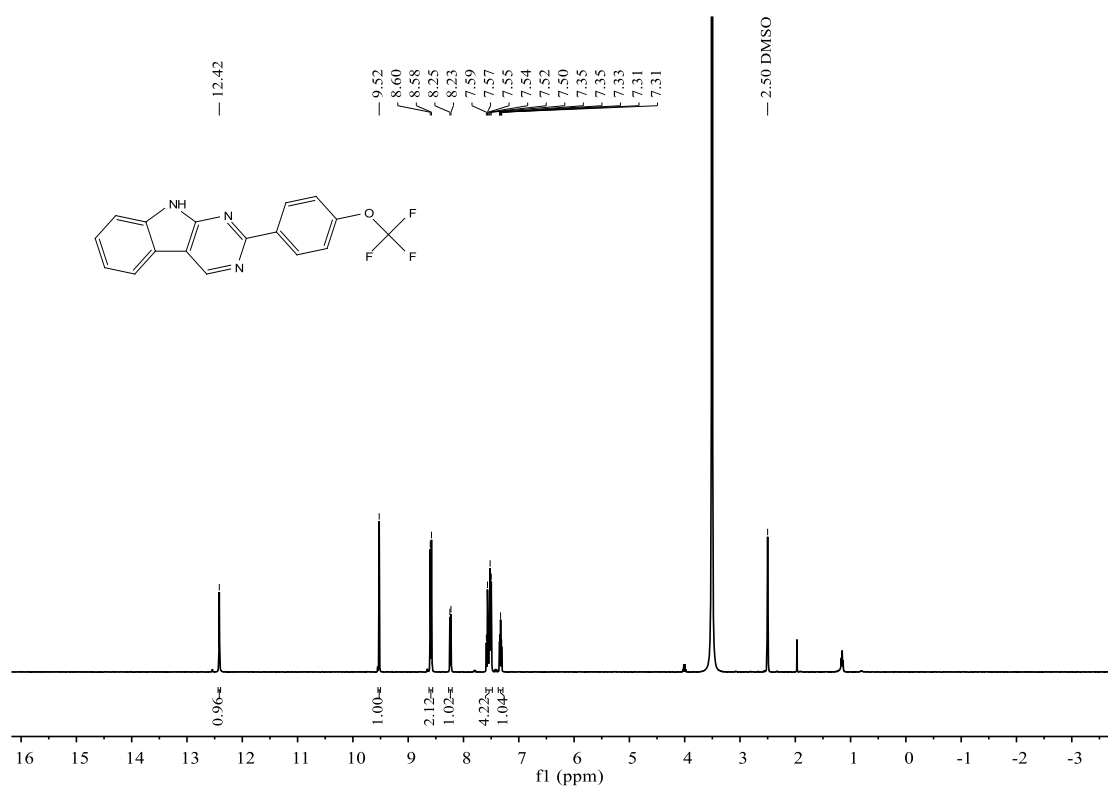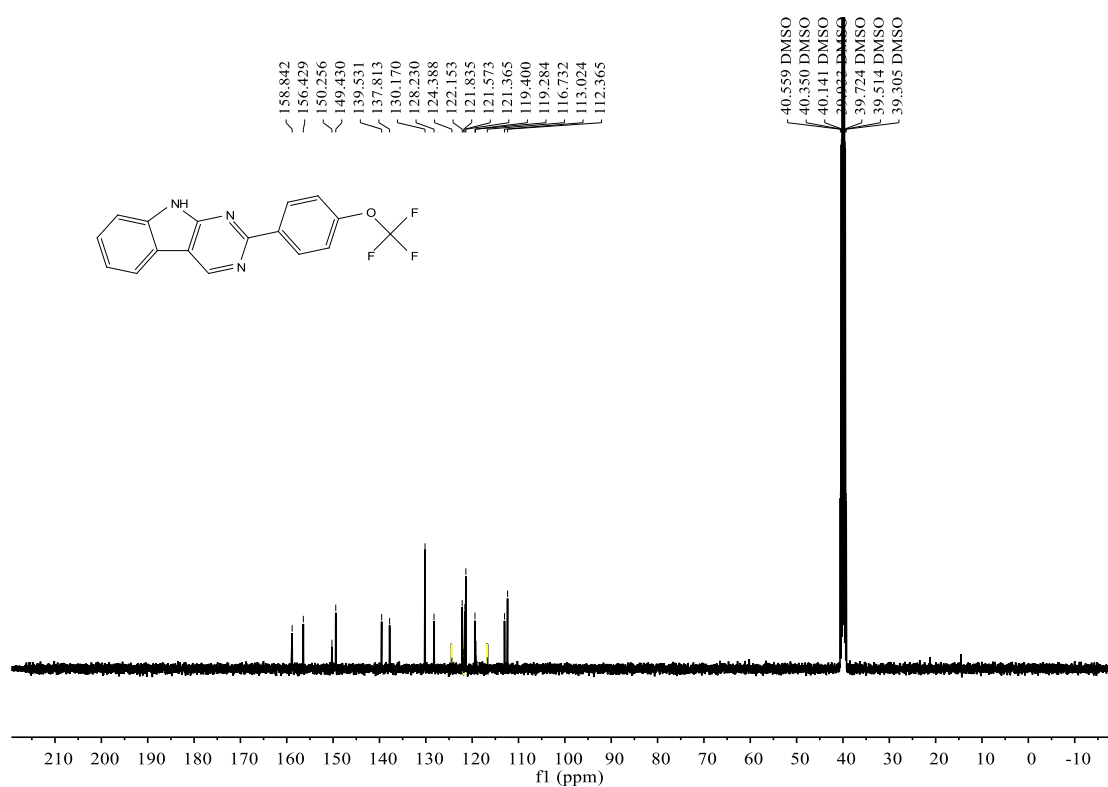

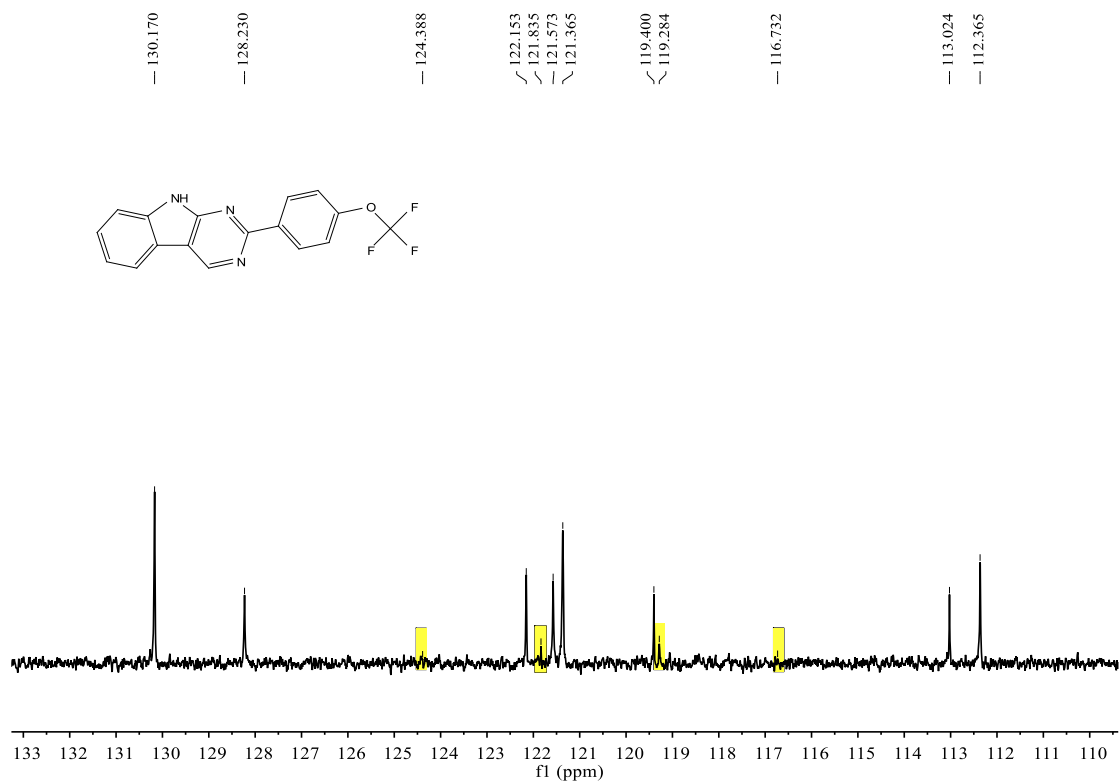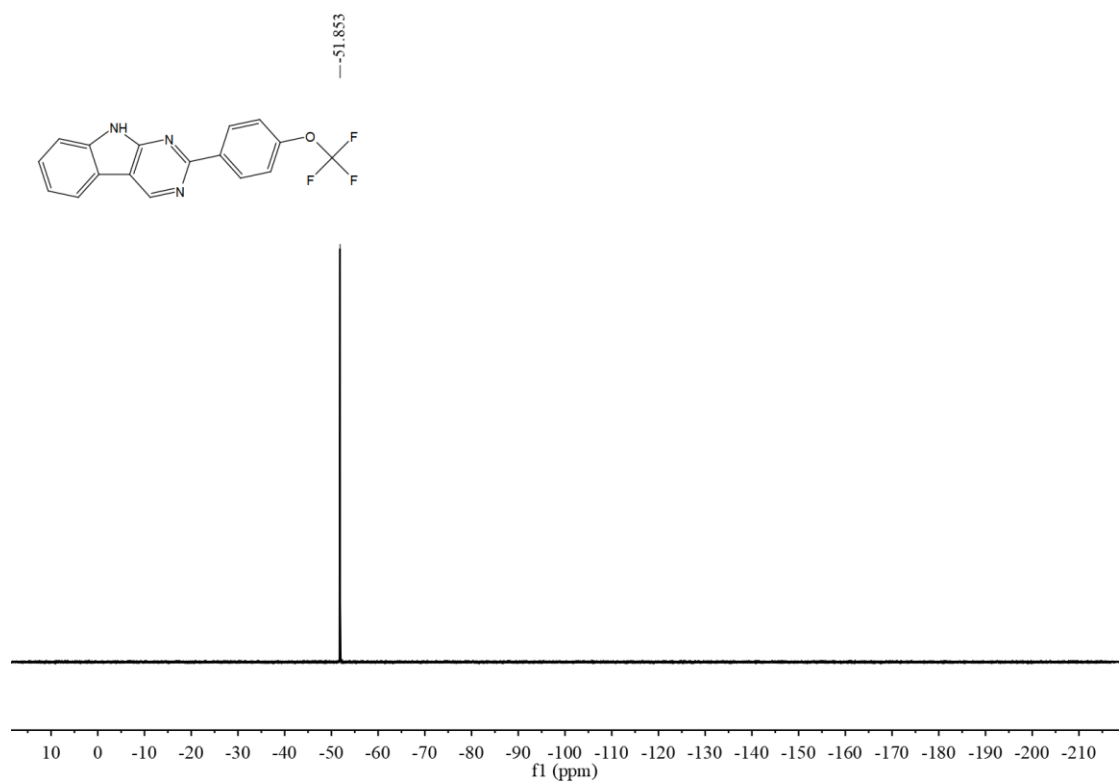

# <sup>1</sup>H NMR and <sup>13</sup>C NMR of compound 3ak

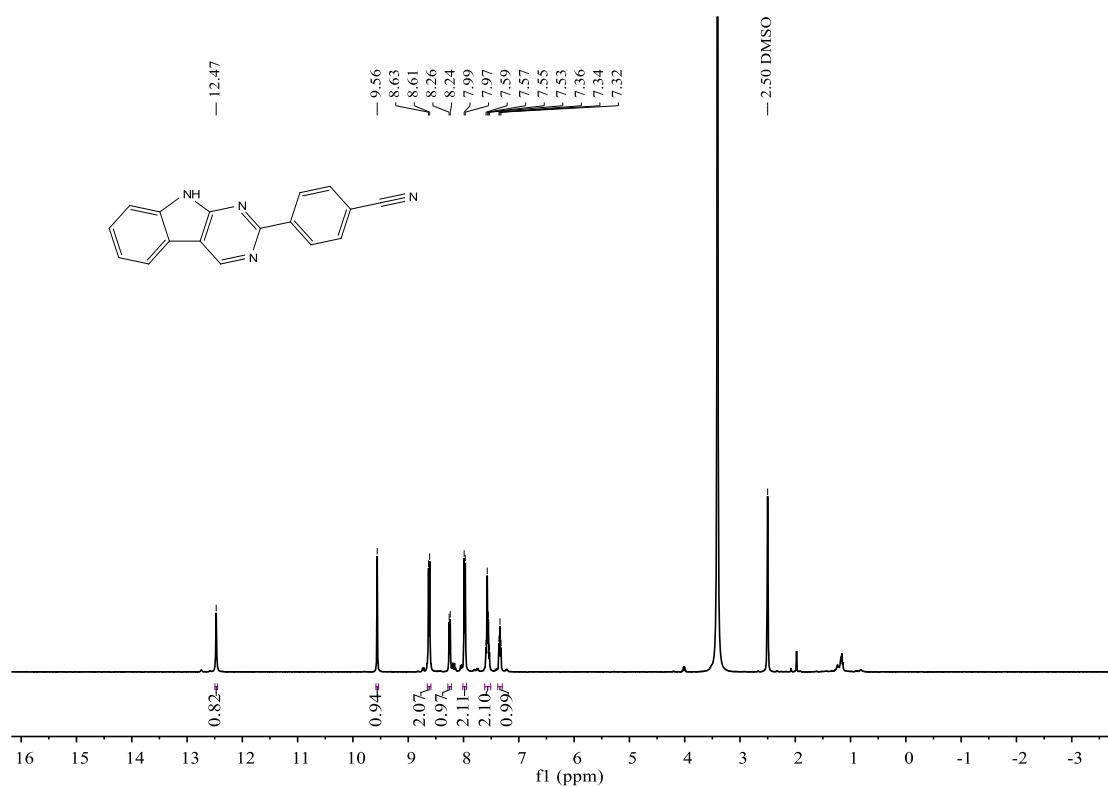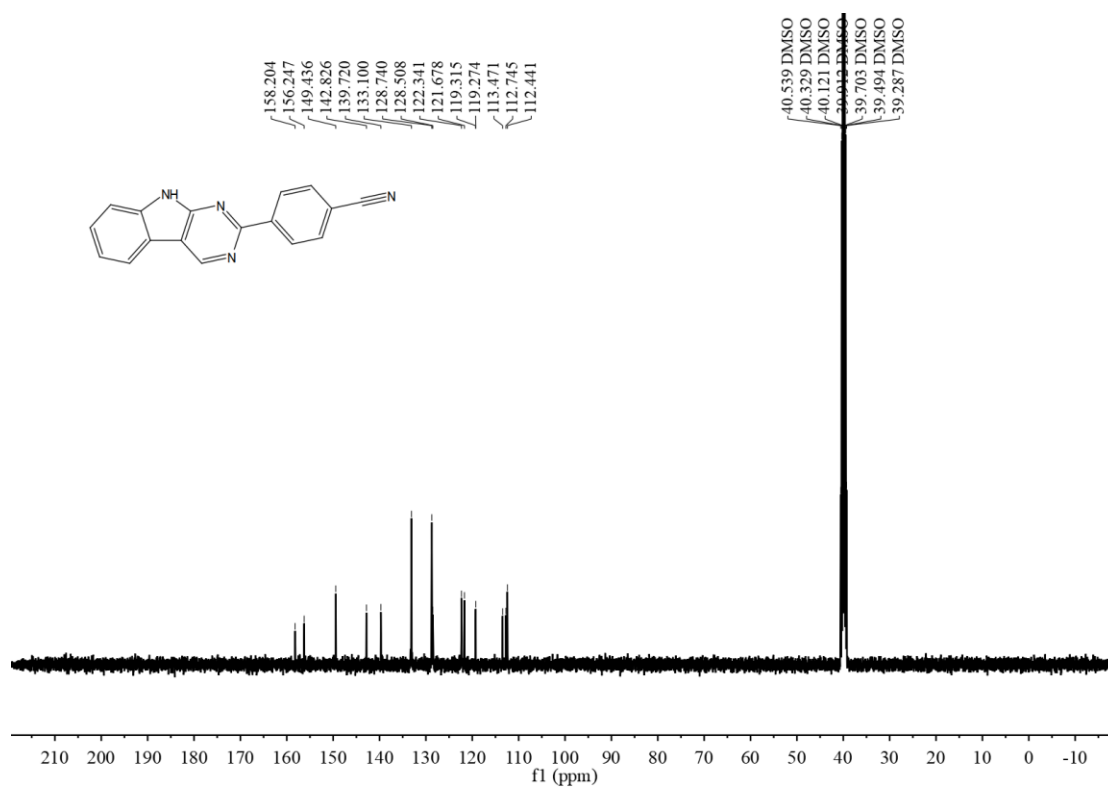

<sup>1</sup>H NMR and <sup>13</sup>C NMR of compound 3aI

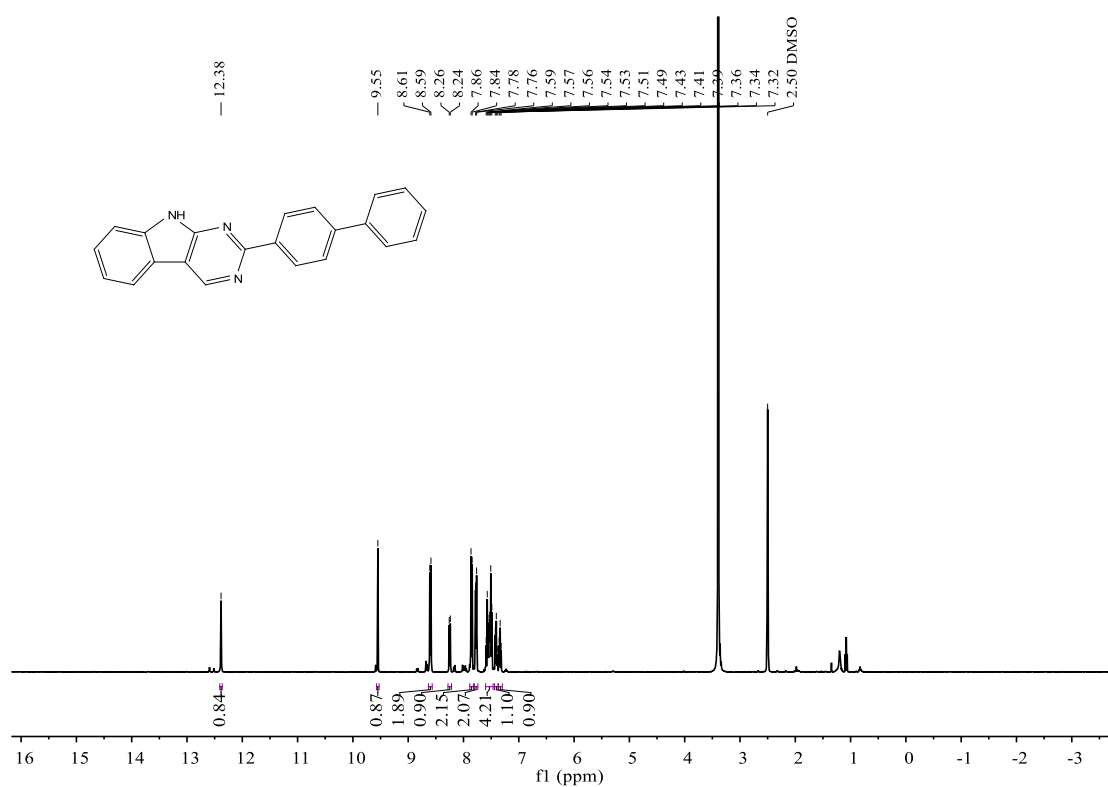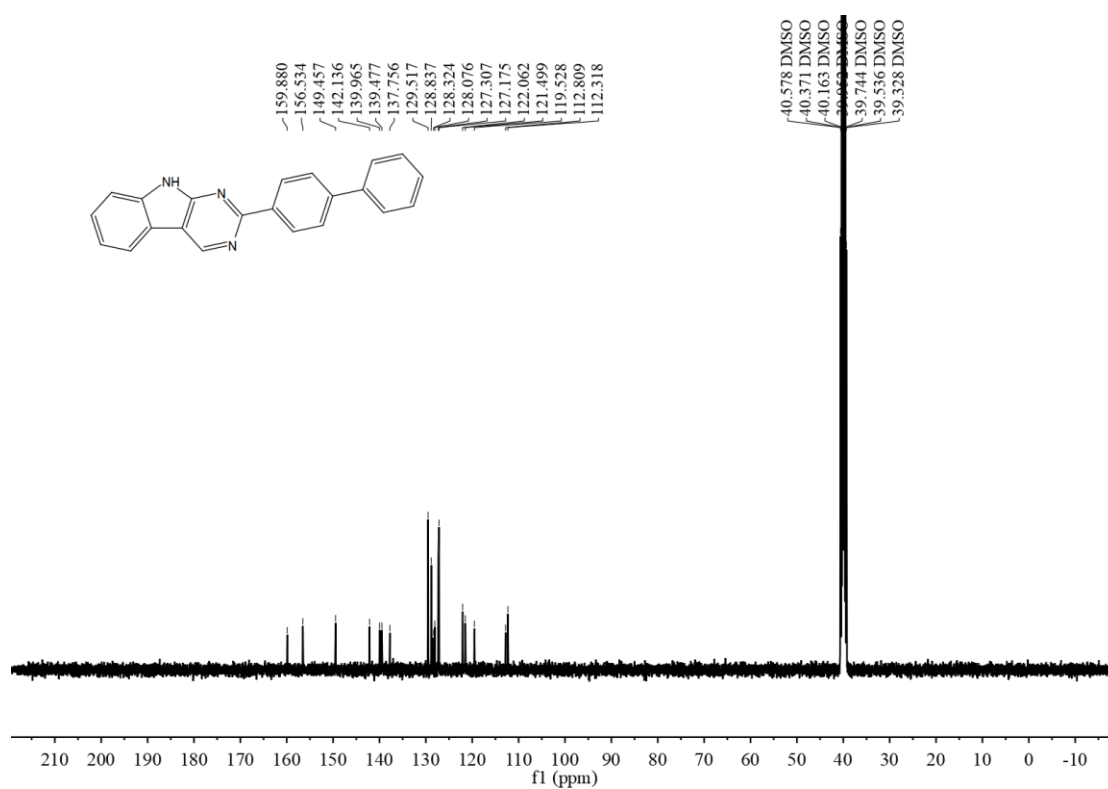

# <sup>1</sup>H NMR and <sup>13</sup>C NMR of compound 3am

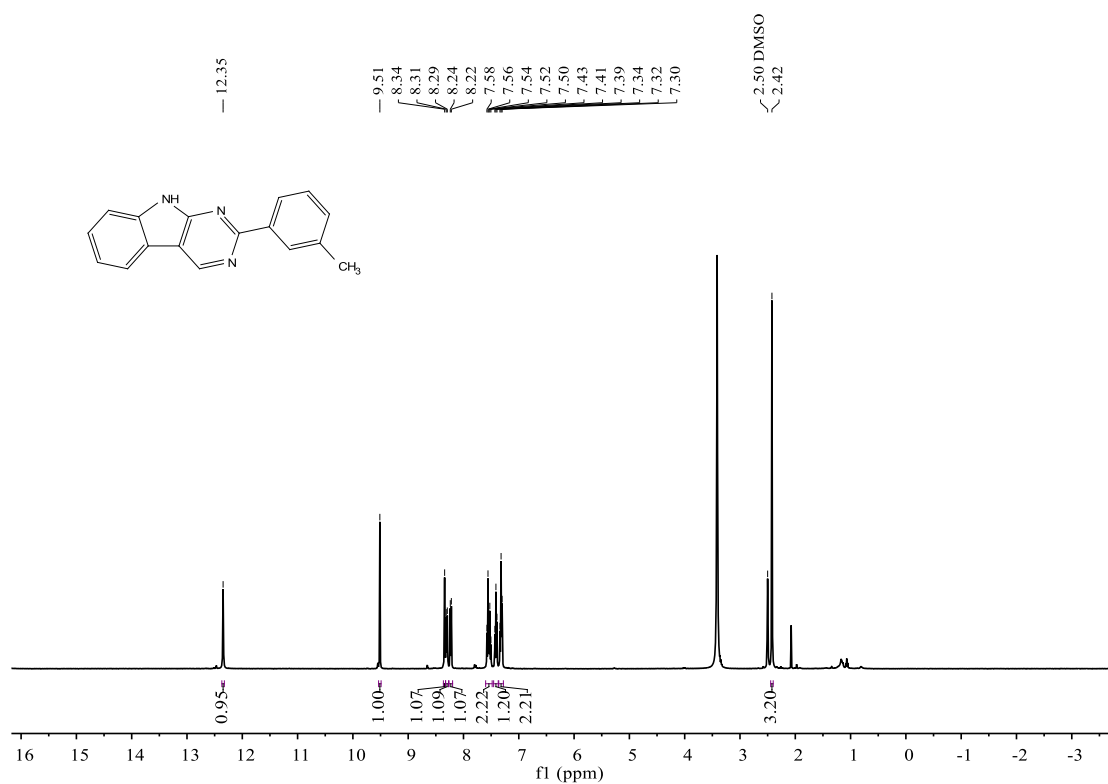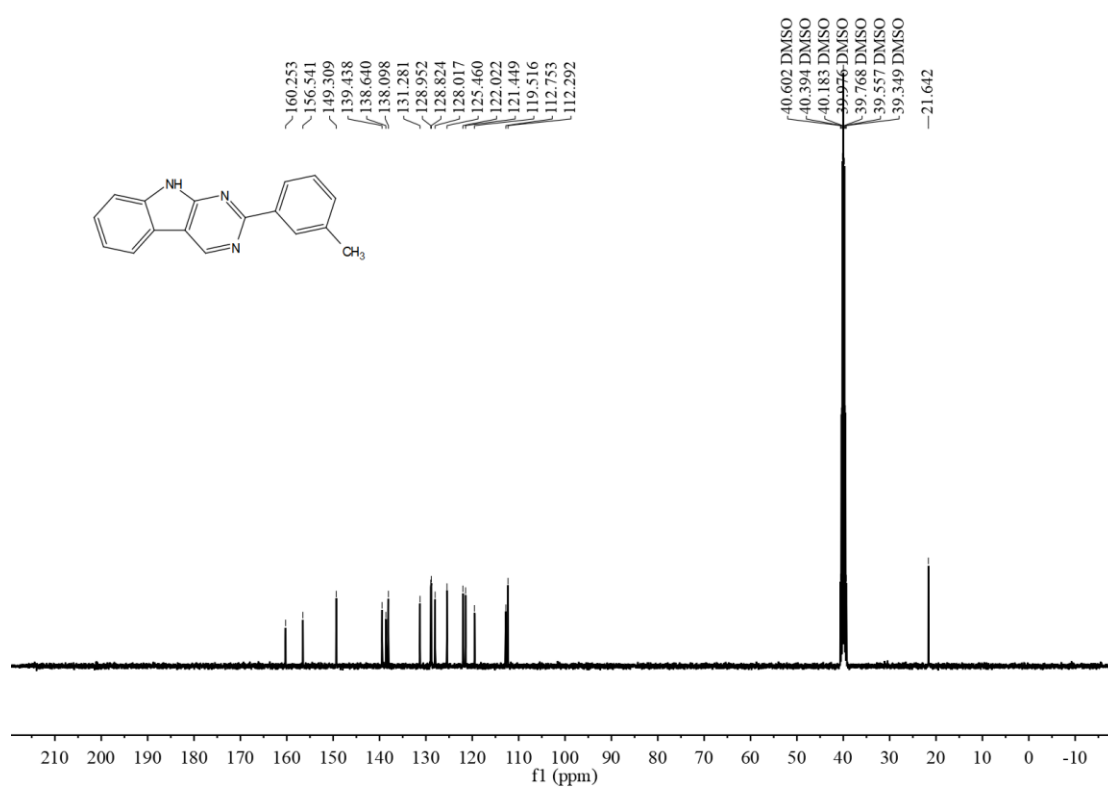

# <sup>1</sup>H NMR and <sup>13</sup>C NMR of compound 3an

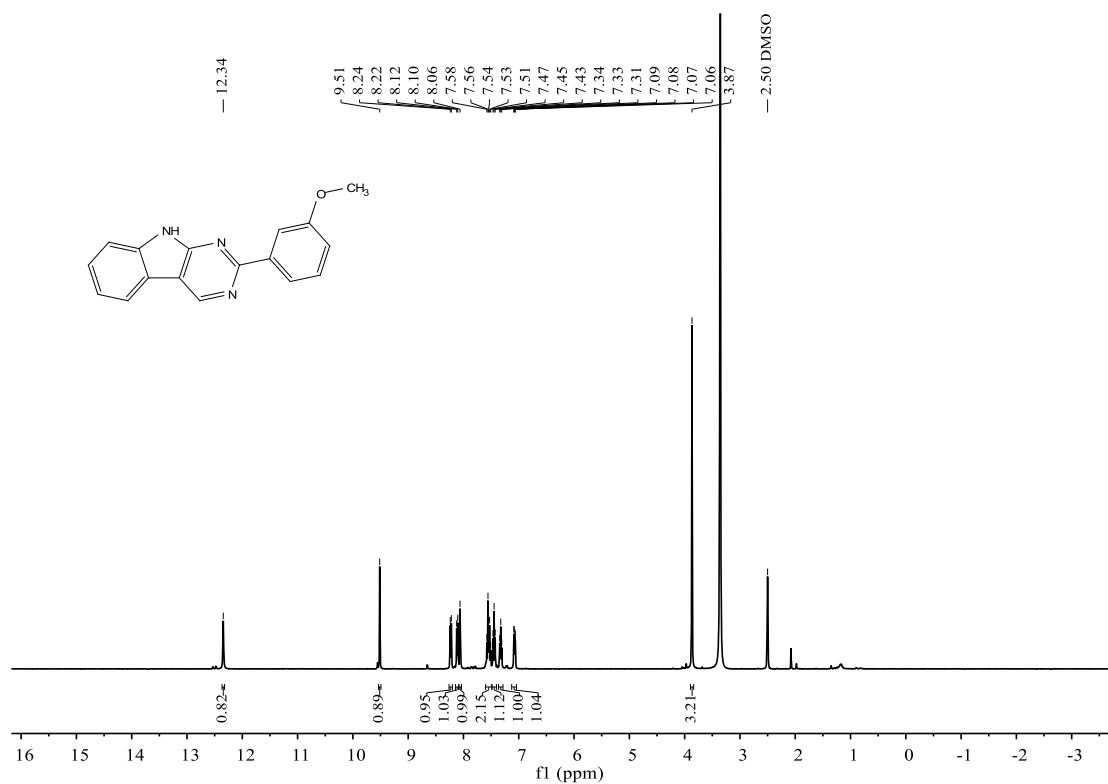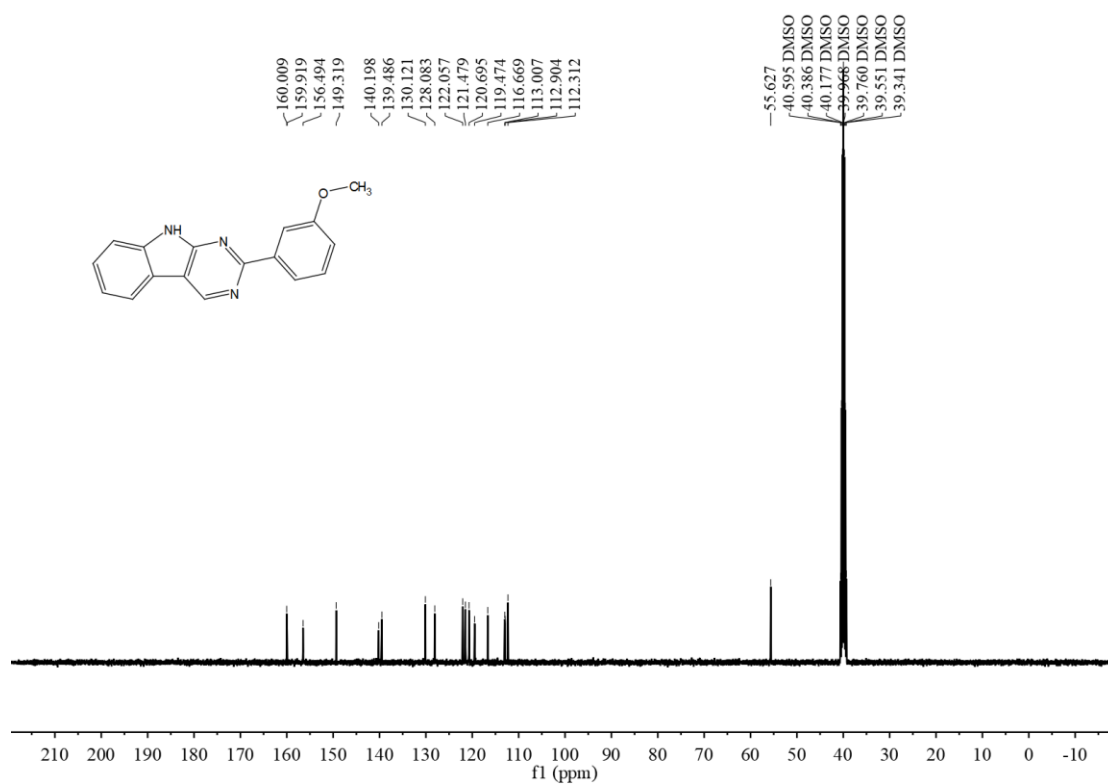

<sup>1</sup>H NMR, <sup>13</sup>C NMR and <sup>19</sup>F NMR of compound 3ao

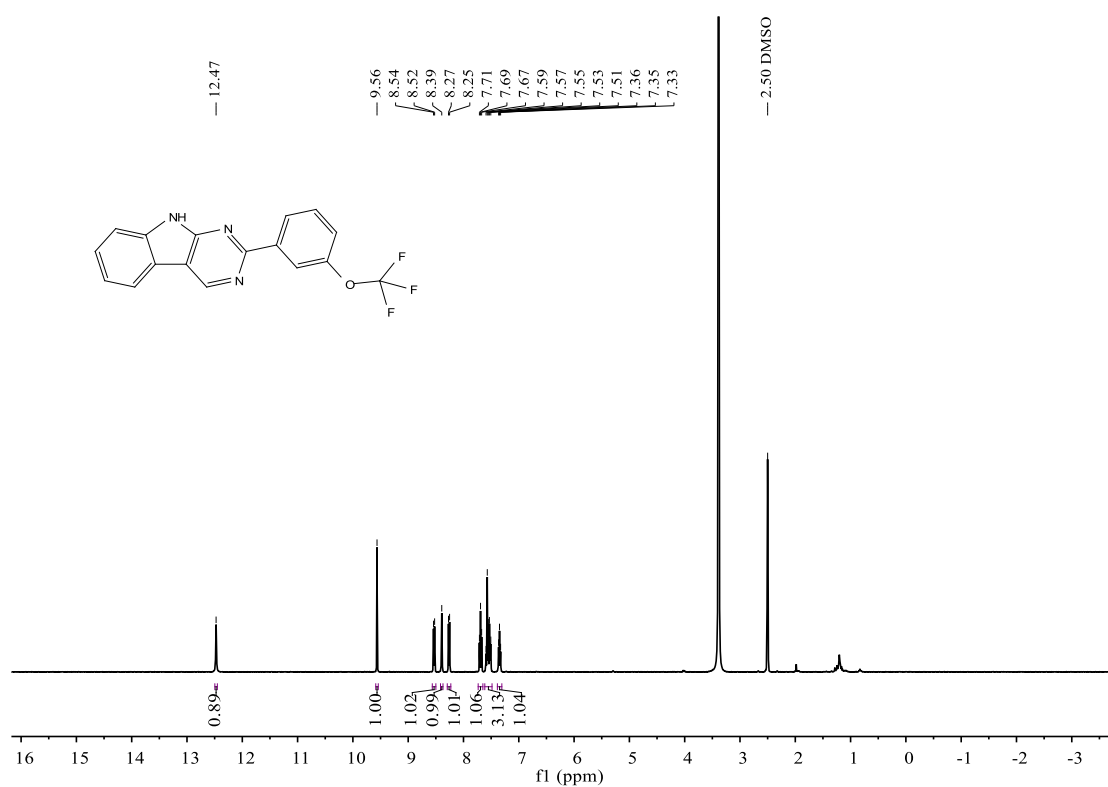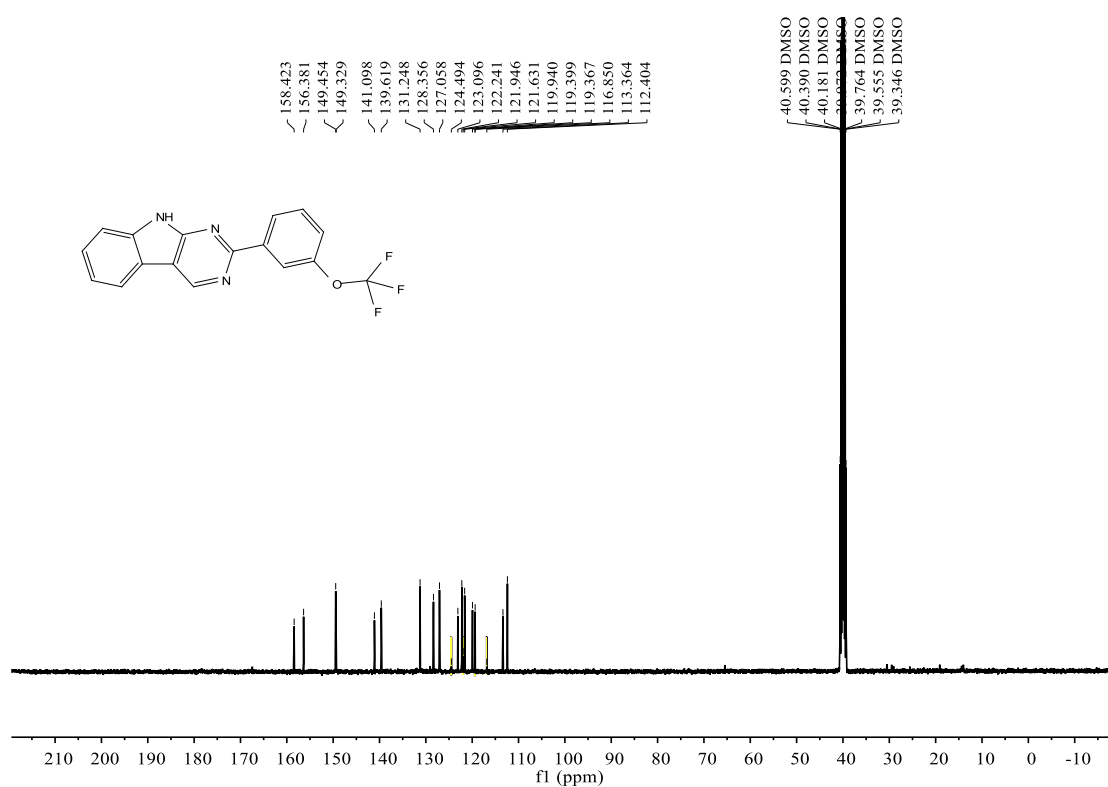

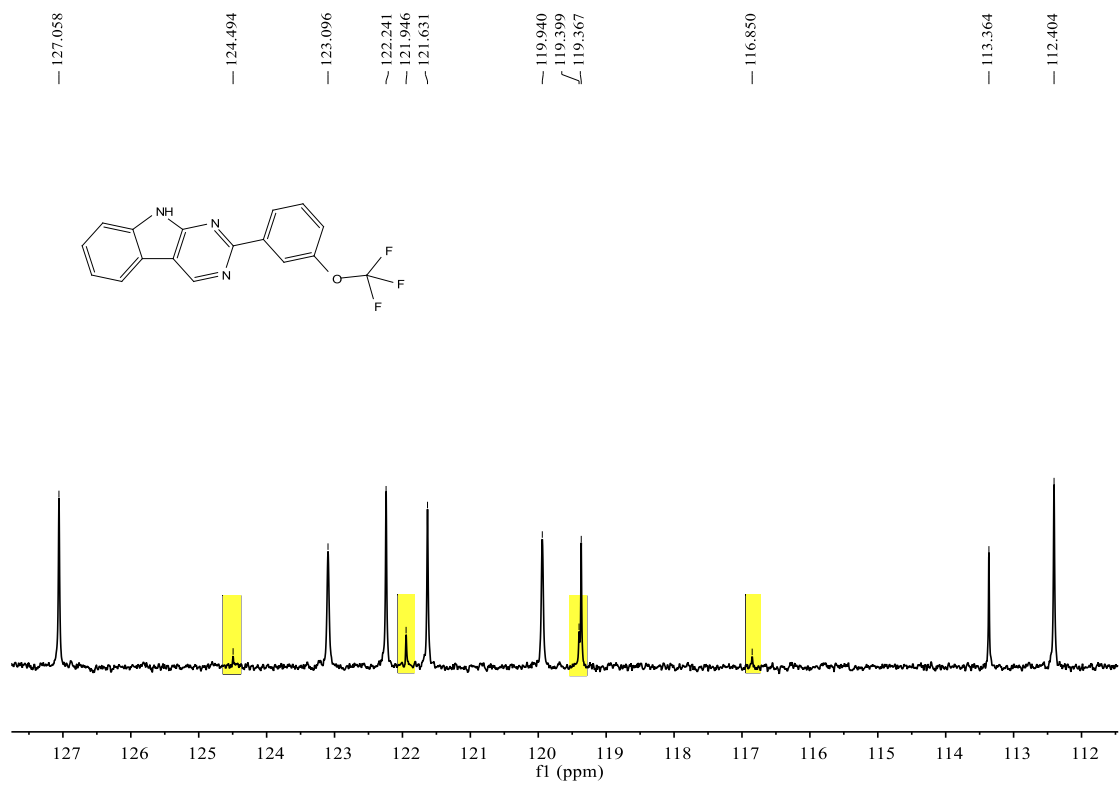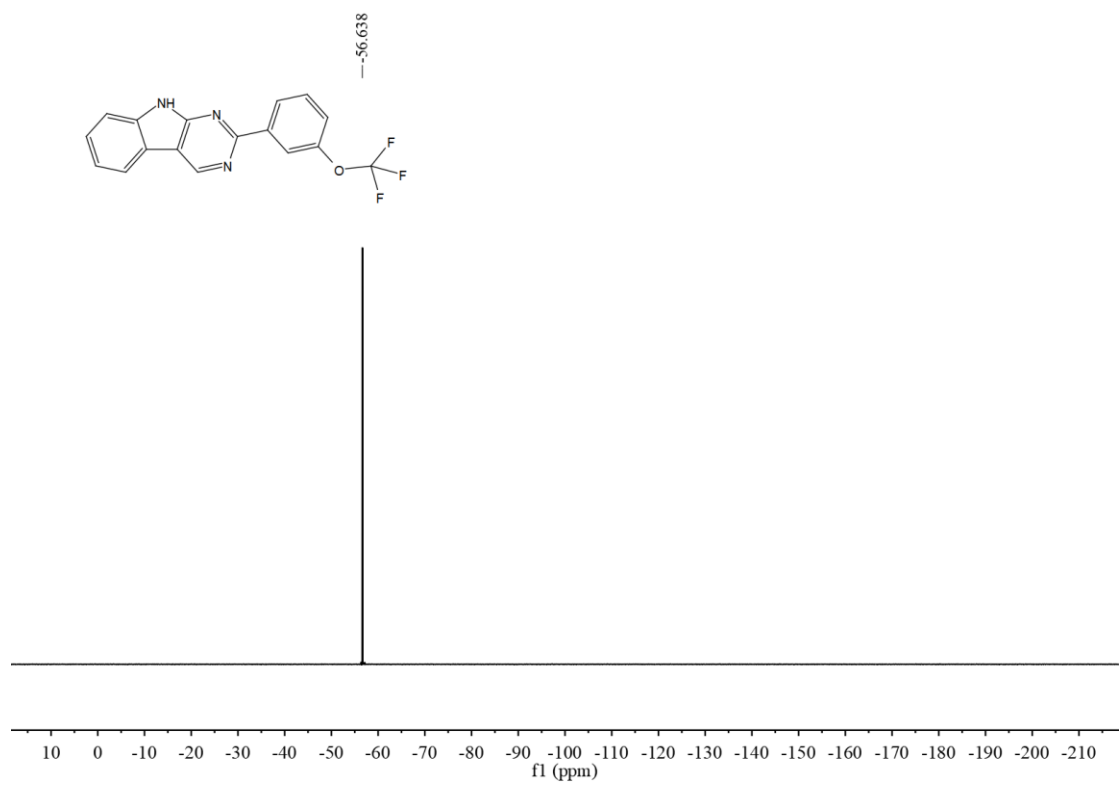

# <sup>1</sup>H NMR and <sup>13</sup>C NMR of compound 3ap

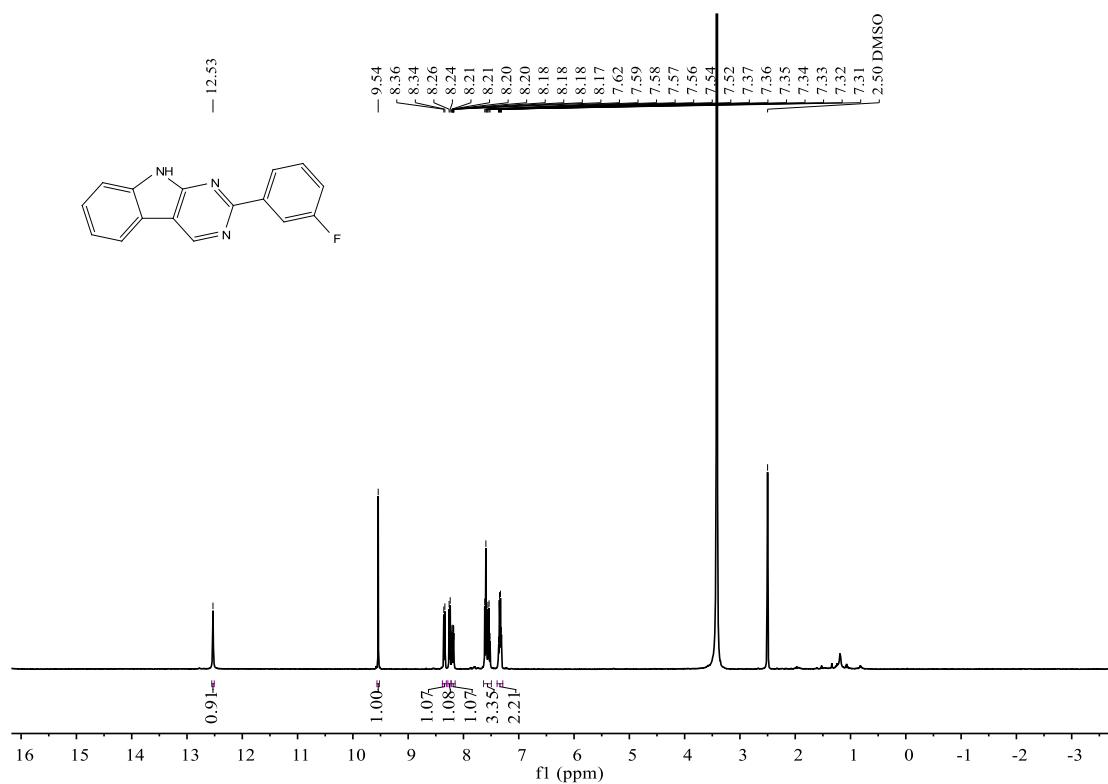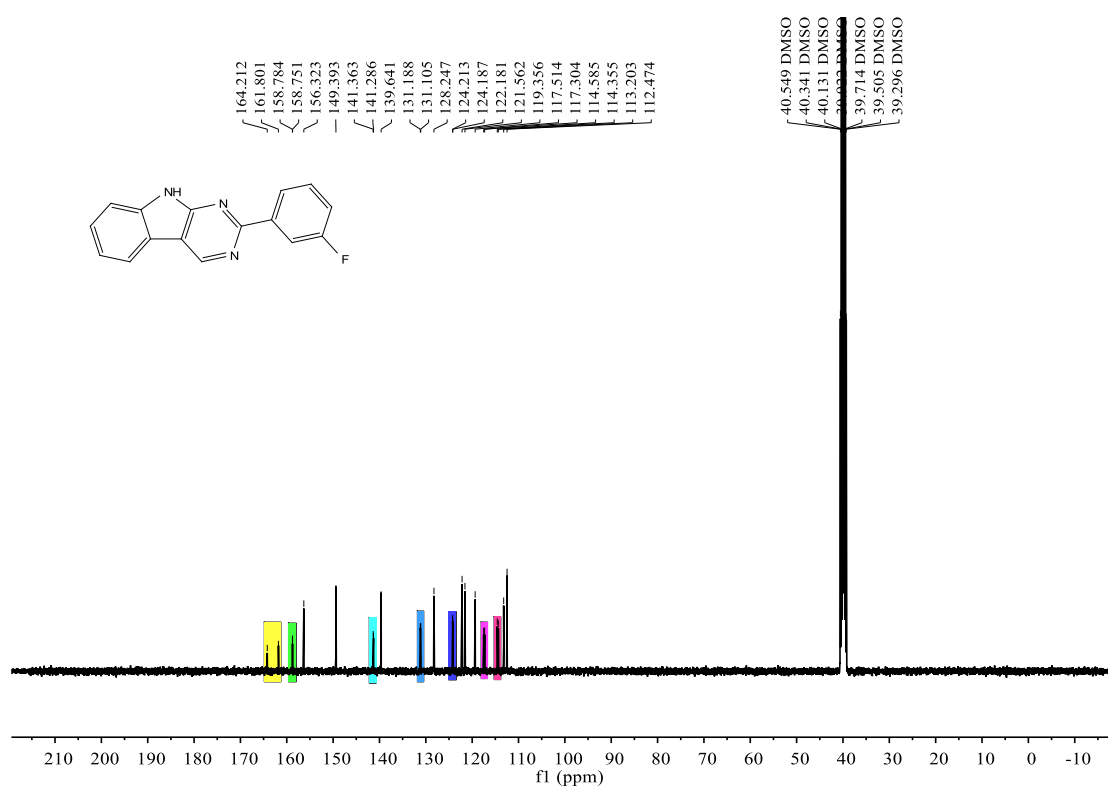

# <sup>1</sup>H NMR and <sup>13</sup>C NMR of compound 3aq

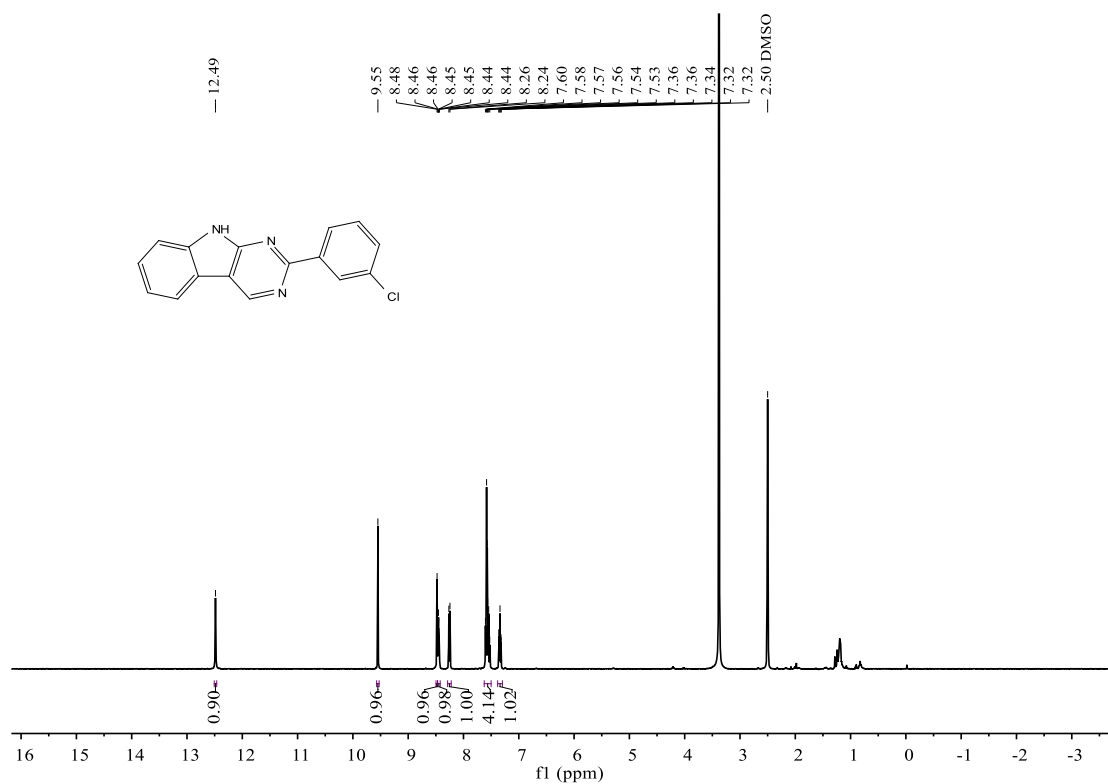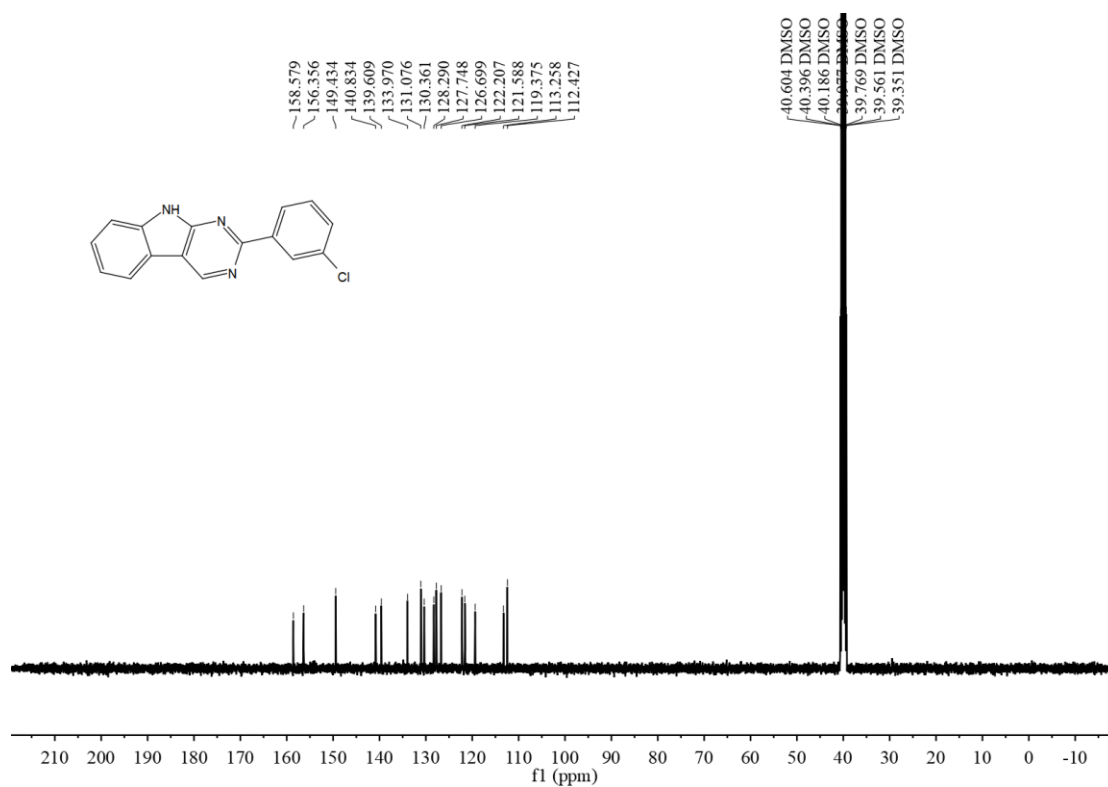

# <sup>1</sup>H NMR and <sup>13</sup>C NMR of compound 3ar

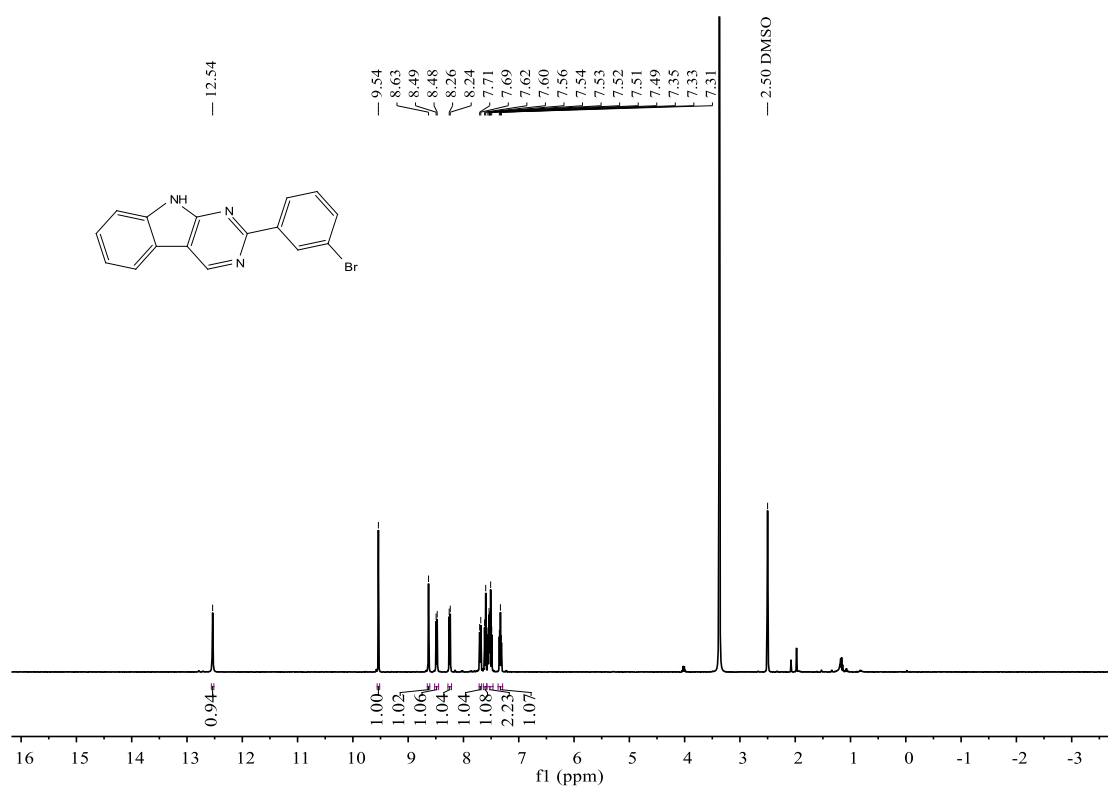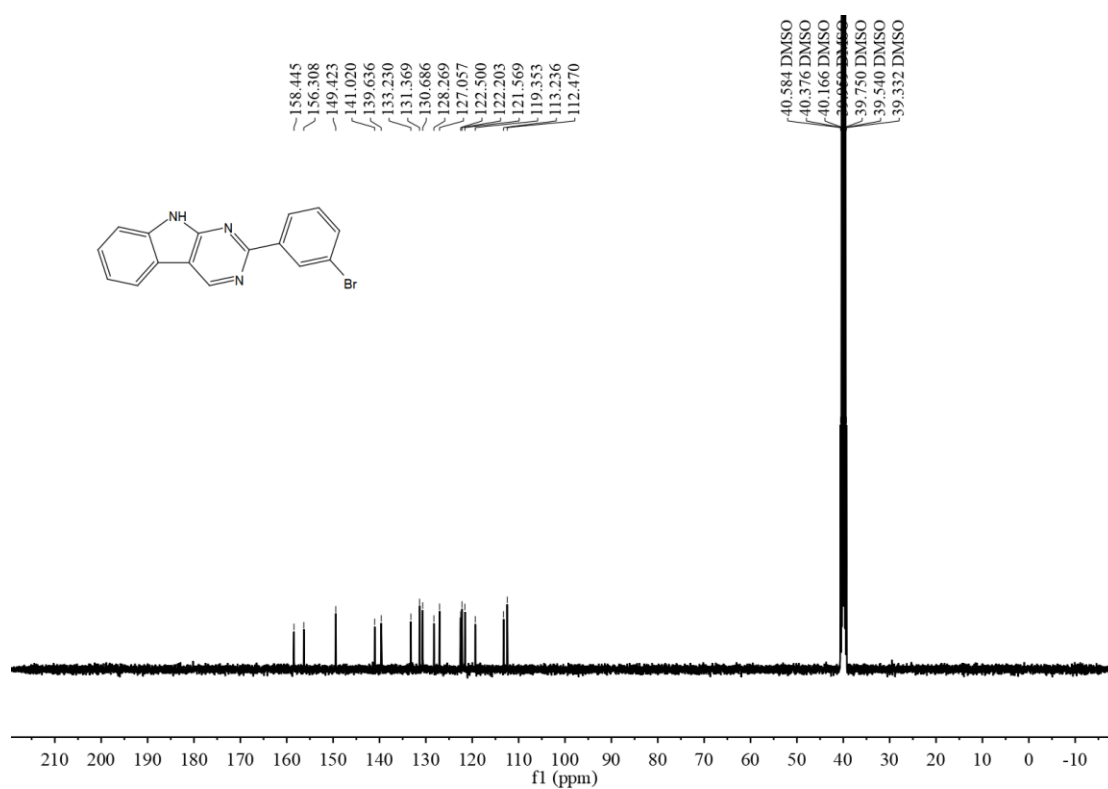

# <sup>1</sup>H NMR and <sup>13</sup>C NMR of compound 3as

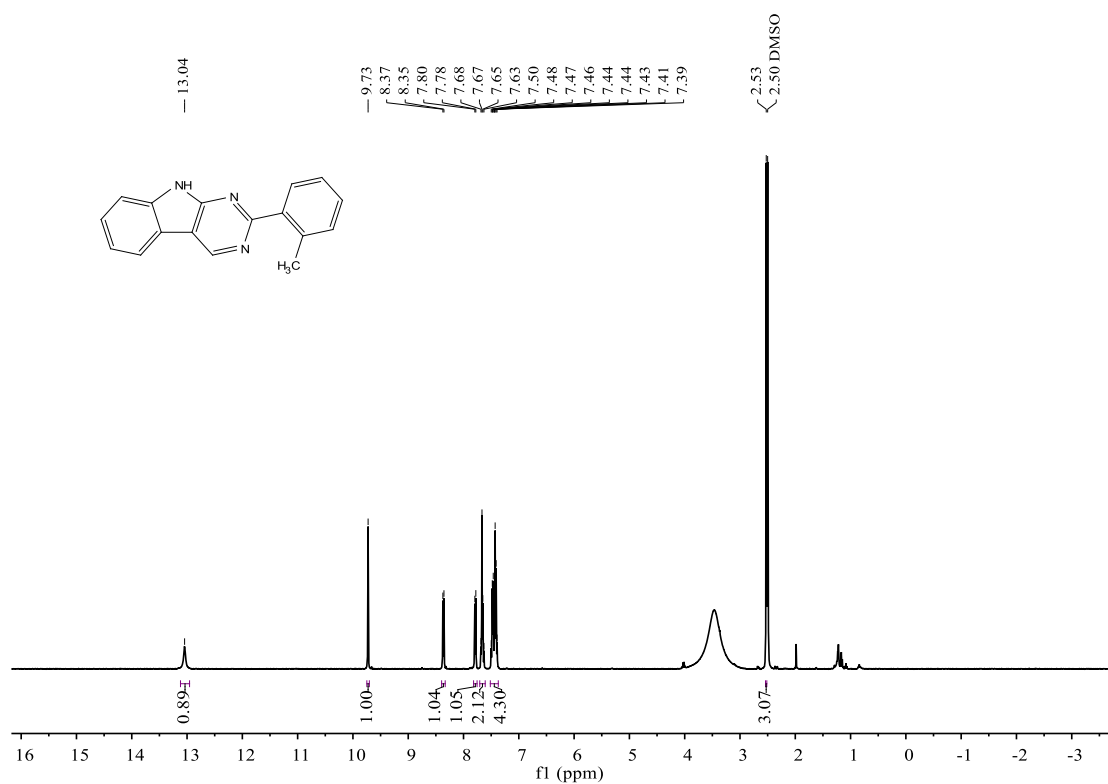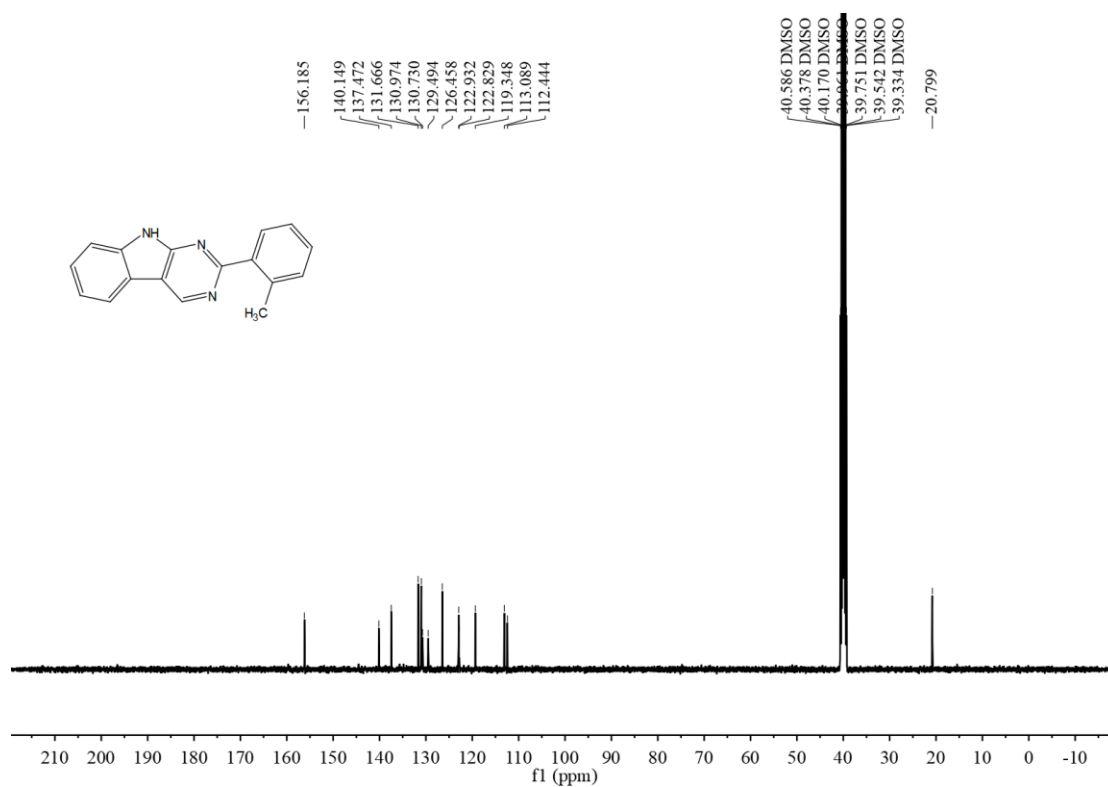

<sup>1</sup>H NMR, <sup>13</sup>C NMR and <sup>19</sup>F NMR of compound 3at

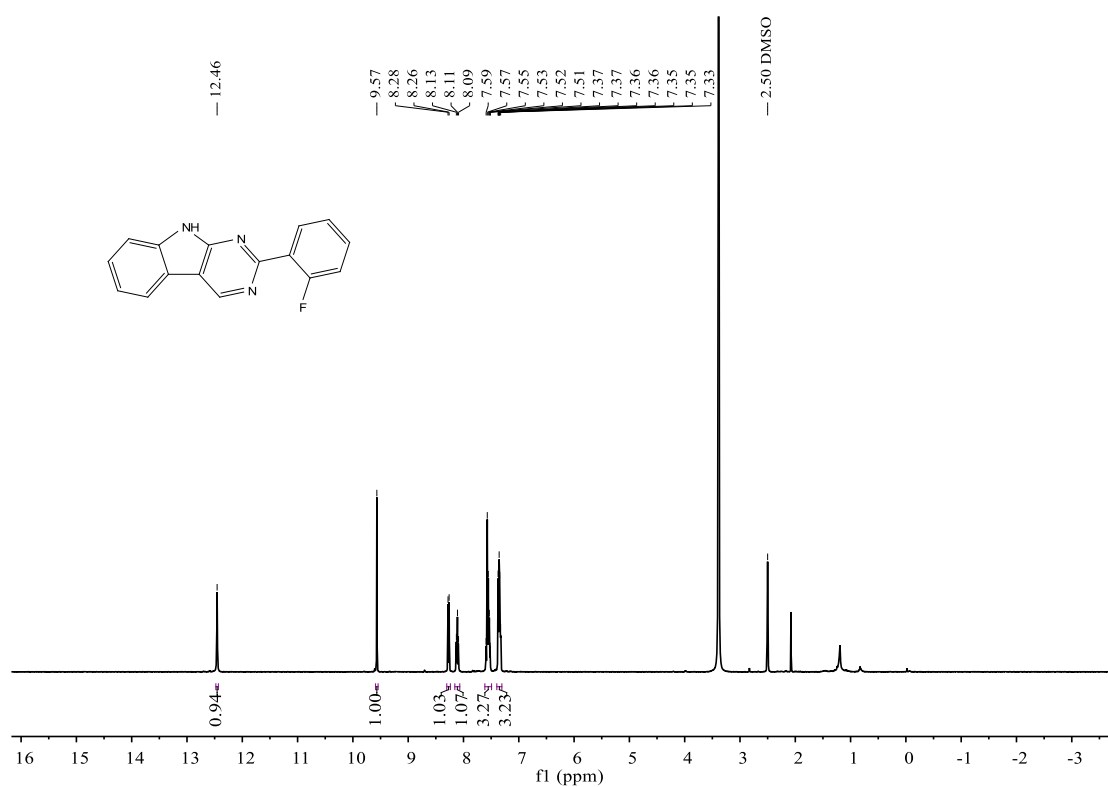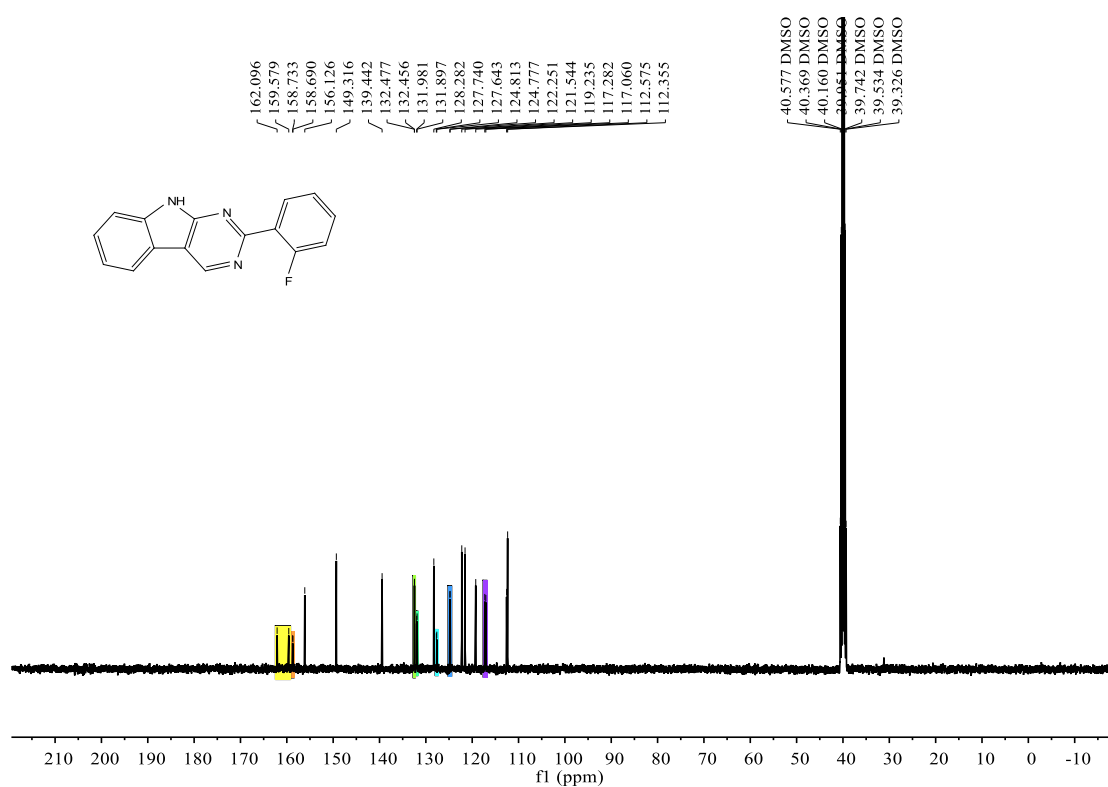

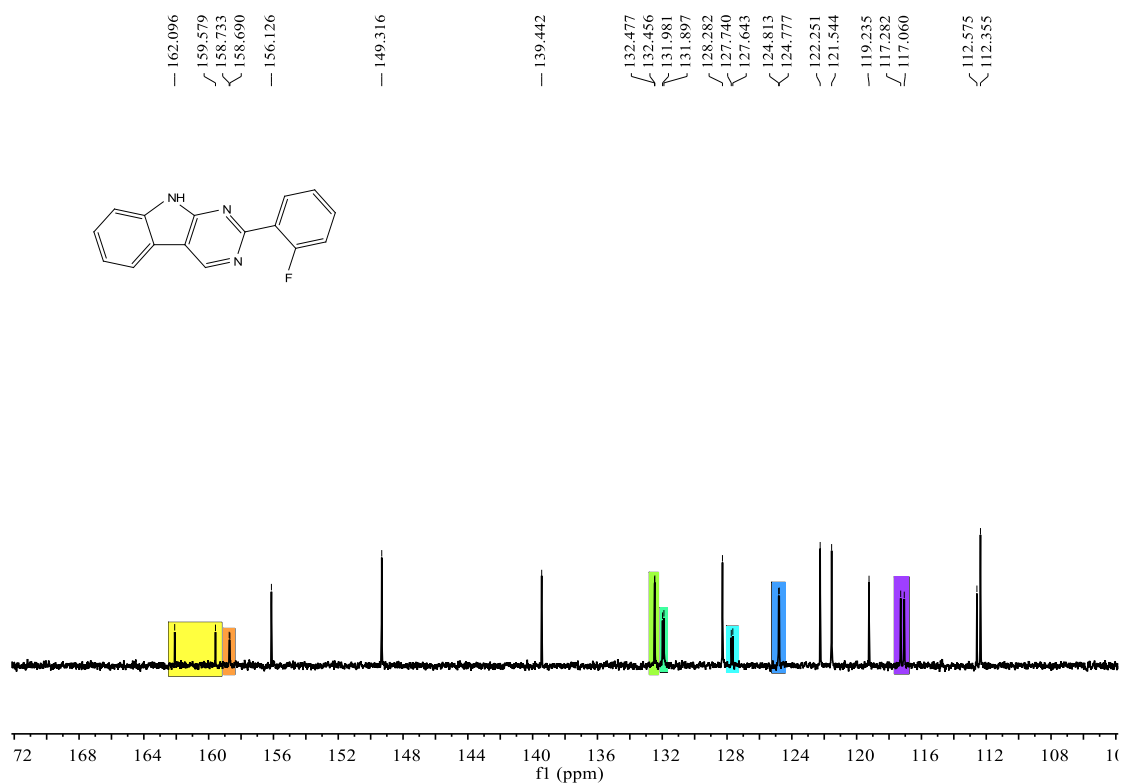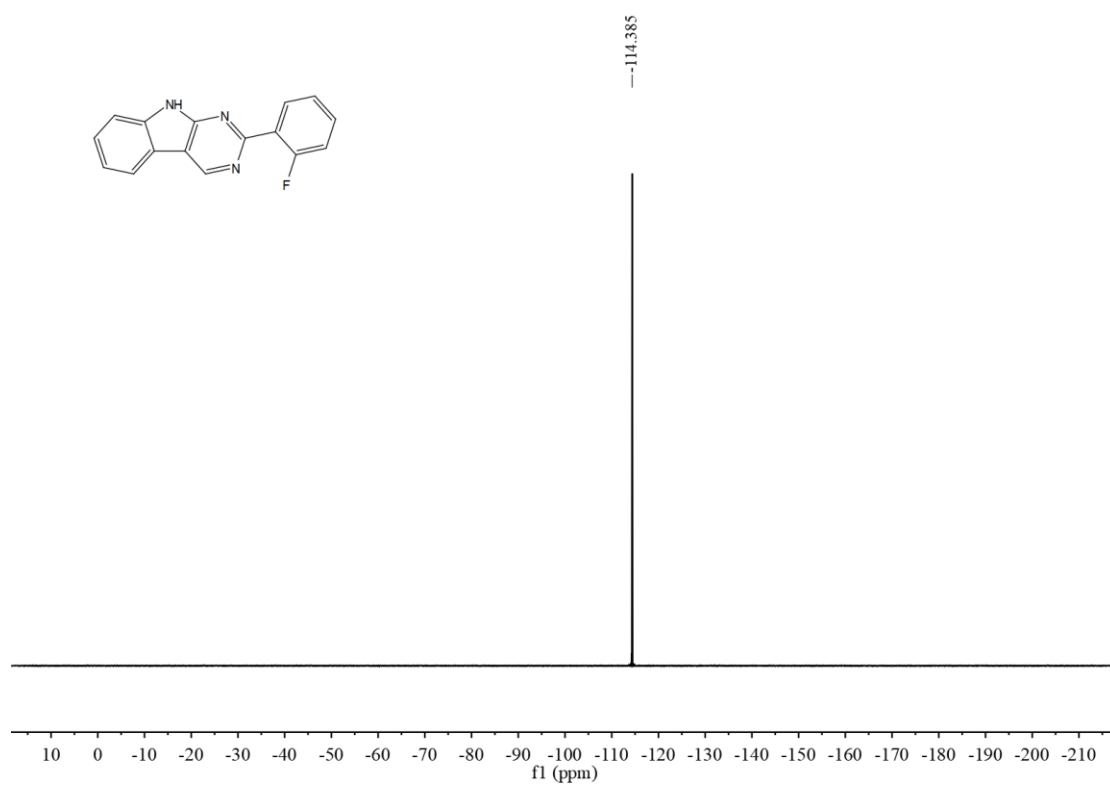

# <sup>1</sup>H NMR and <sup>13</sup>C NMR of compound 3au

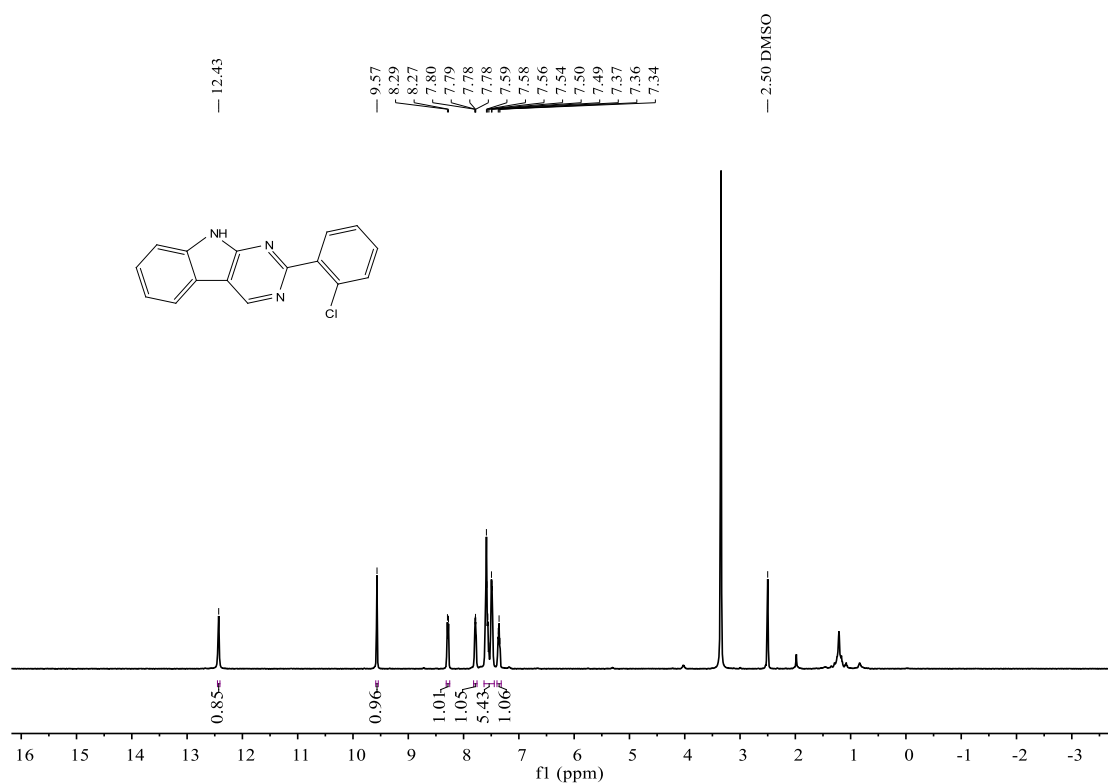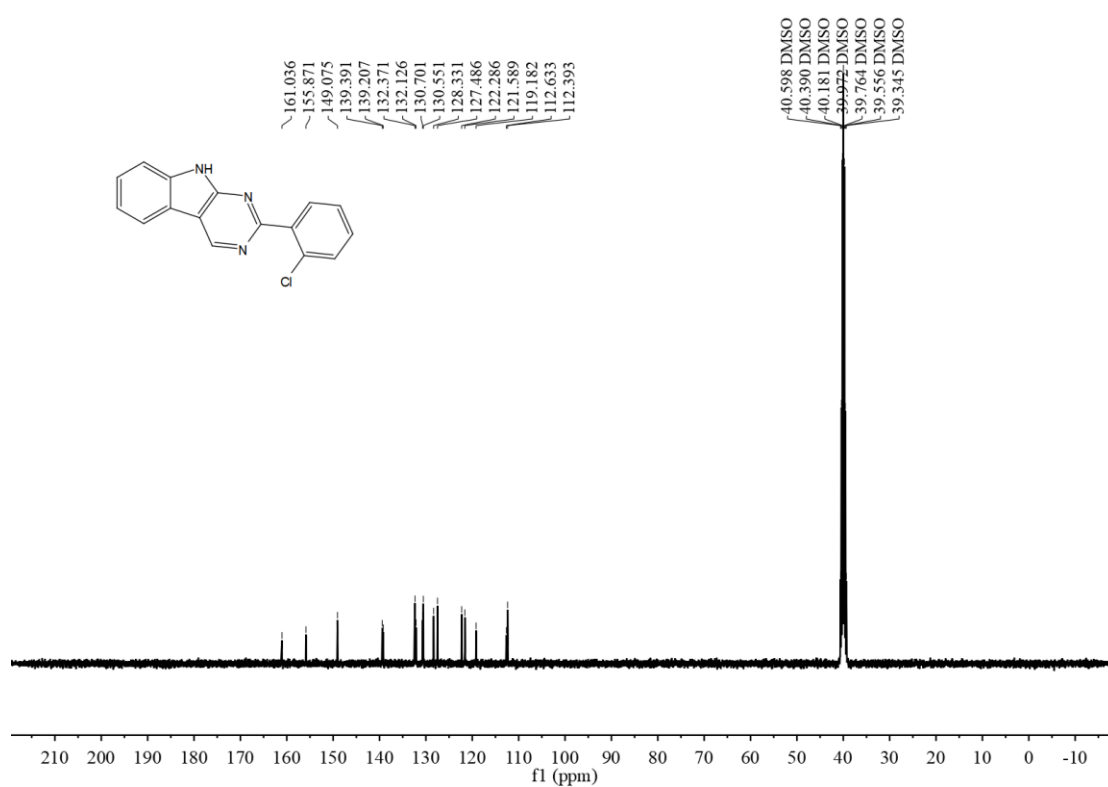

<sup>1</sup>H NMR and <sup>13</sup>C NMR of compound 3av

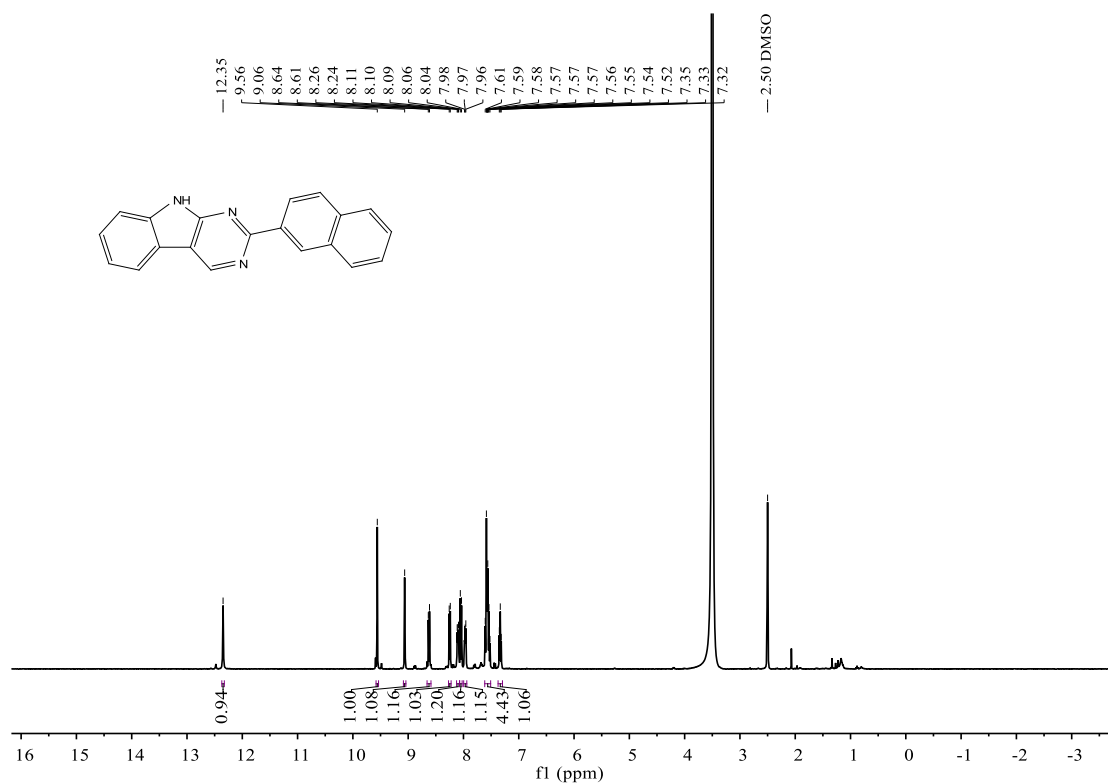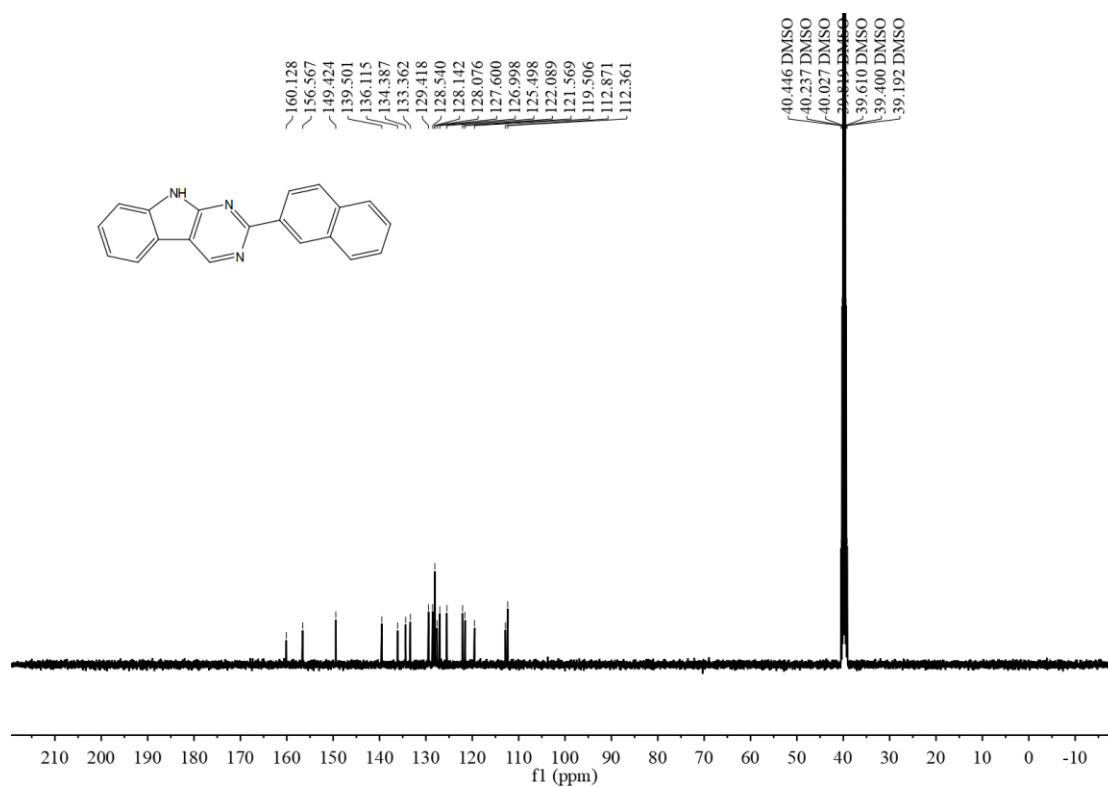

### <sup>1</sup>H NMR and <sup>13</sup>C NMR of compound 3aw

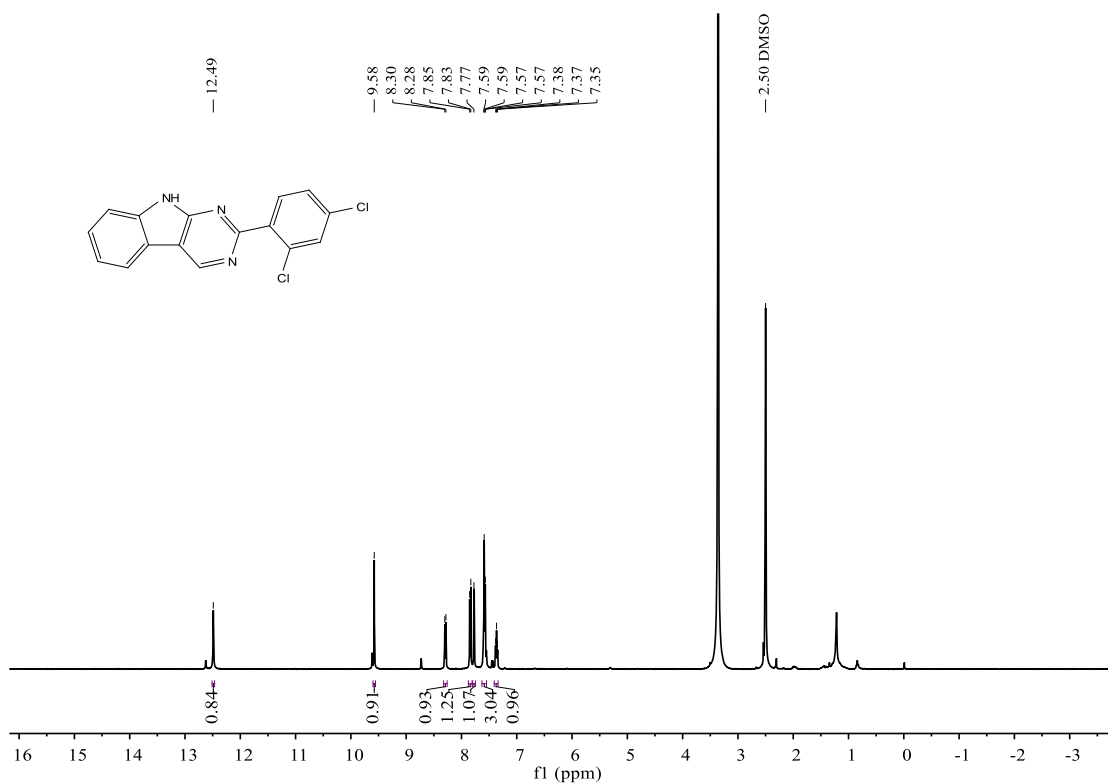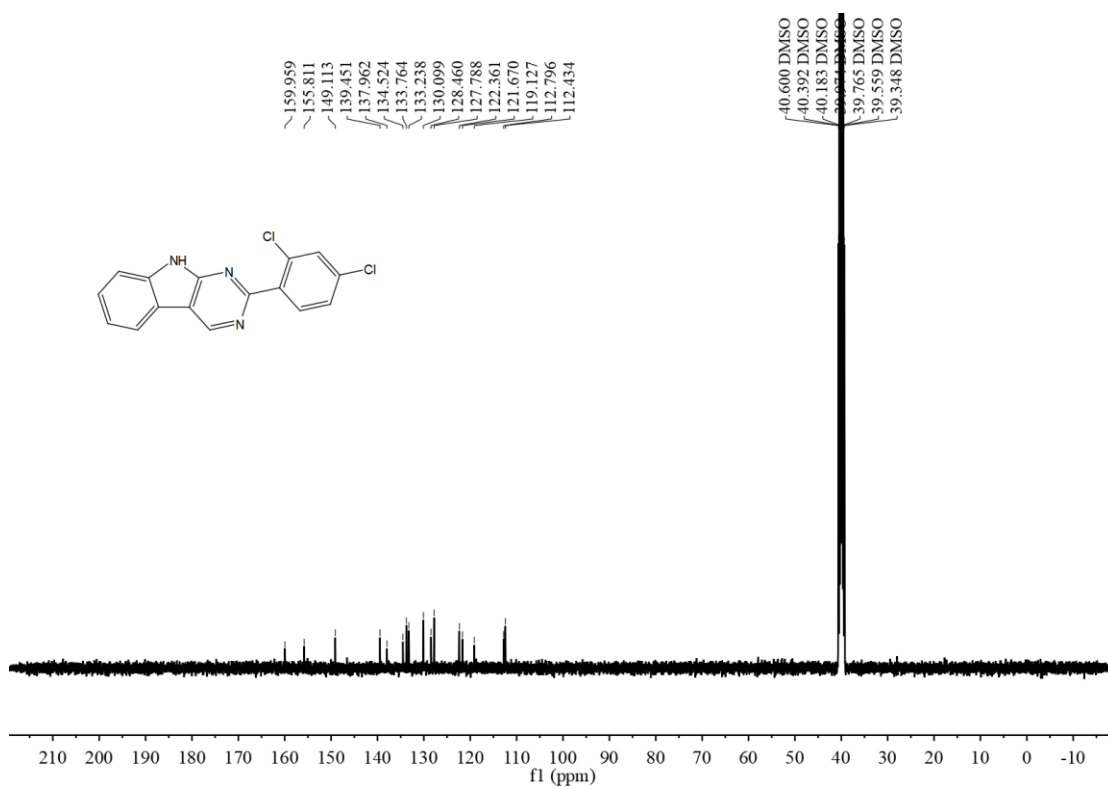

<sup>1</sup>H NMR and <sup>13</sup>C NMR of compound 3ax

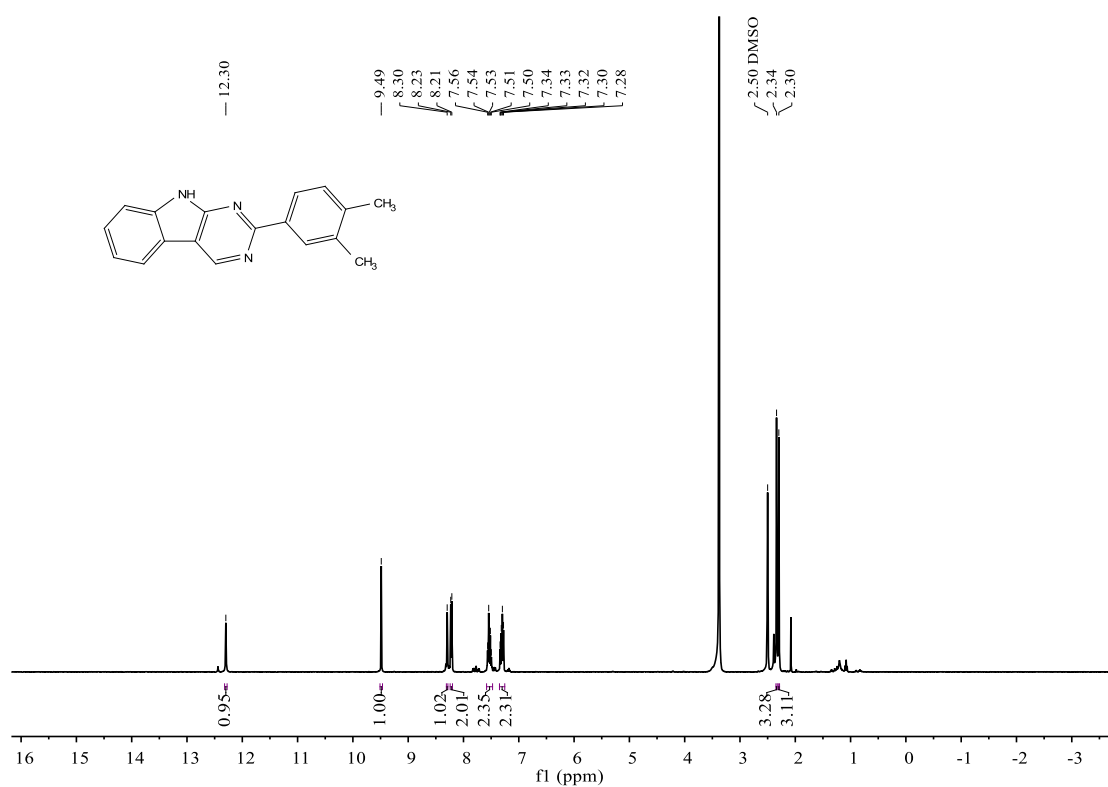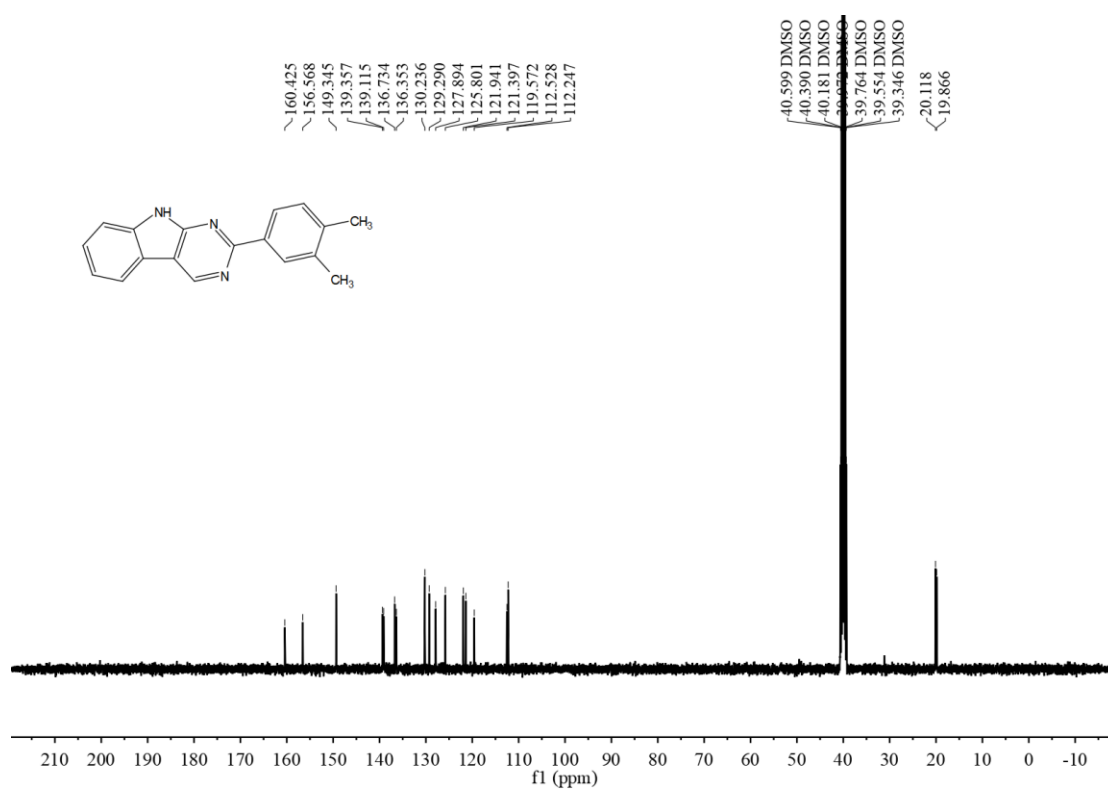

# <sup>1</sup>H NMR and <sup>13</sup>C NMR of compound 3ay

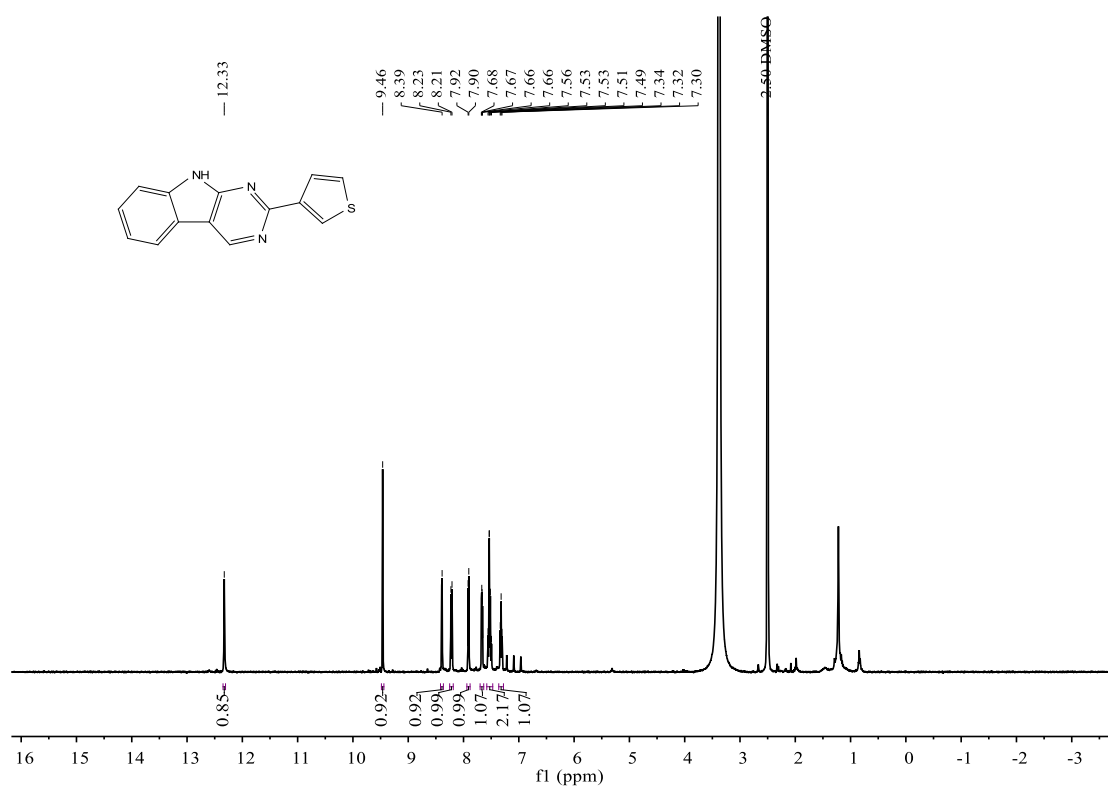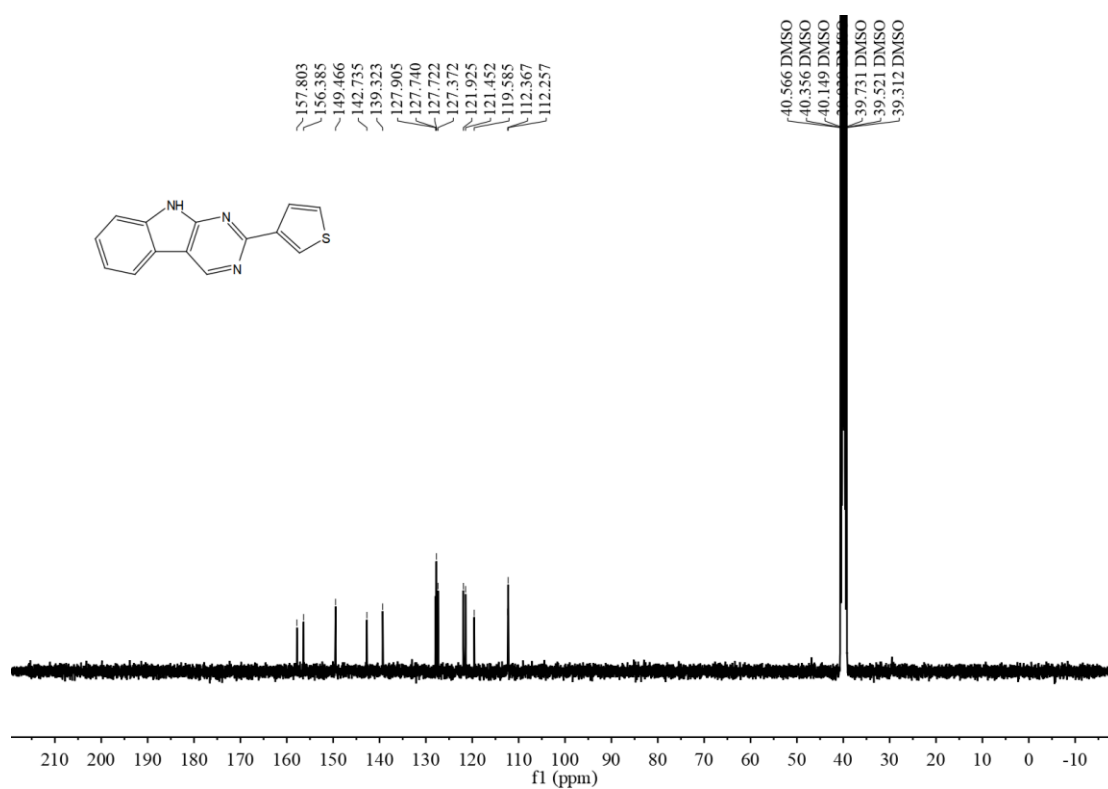

# <sup>1</sup>H NMR and <sup>13</sup>C NMR of compound 3az

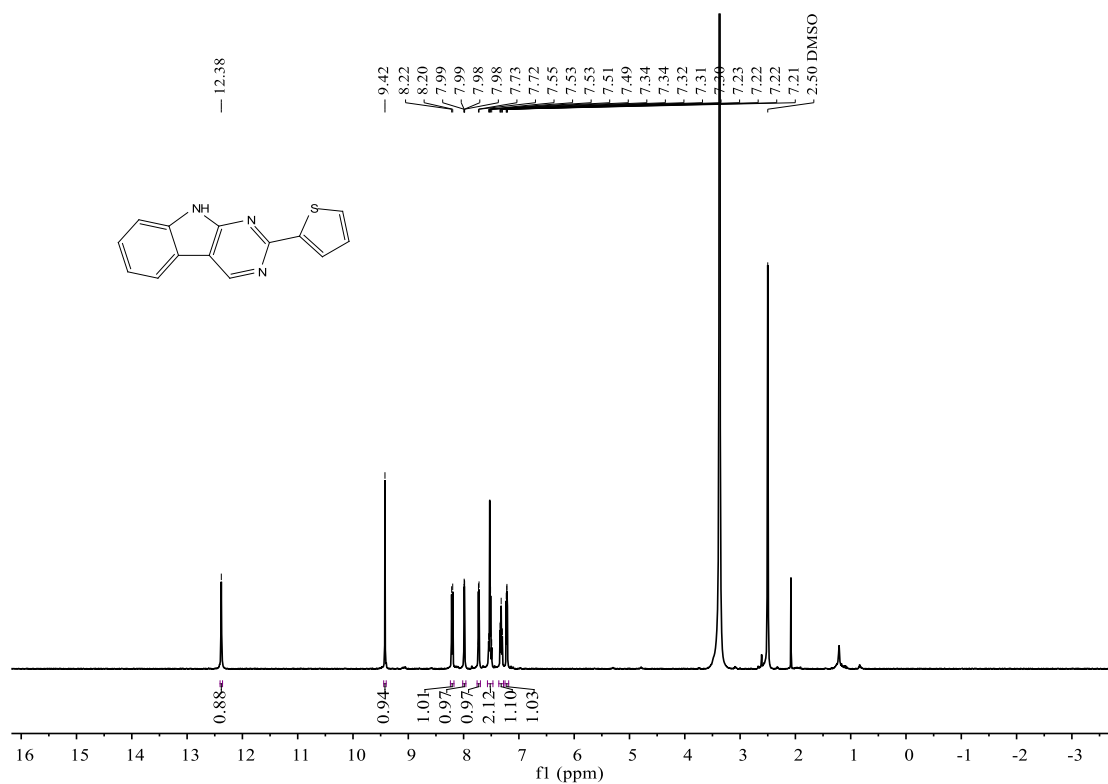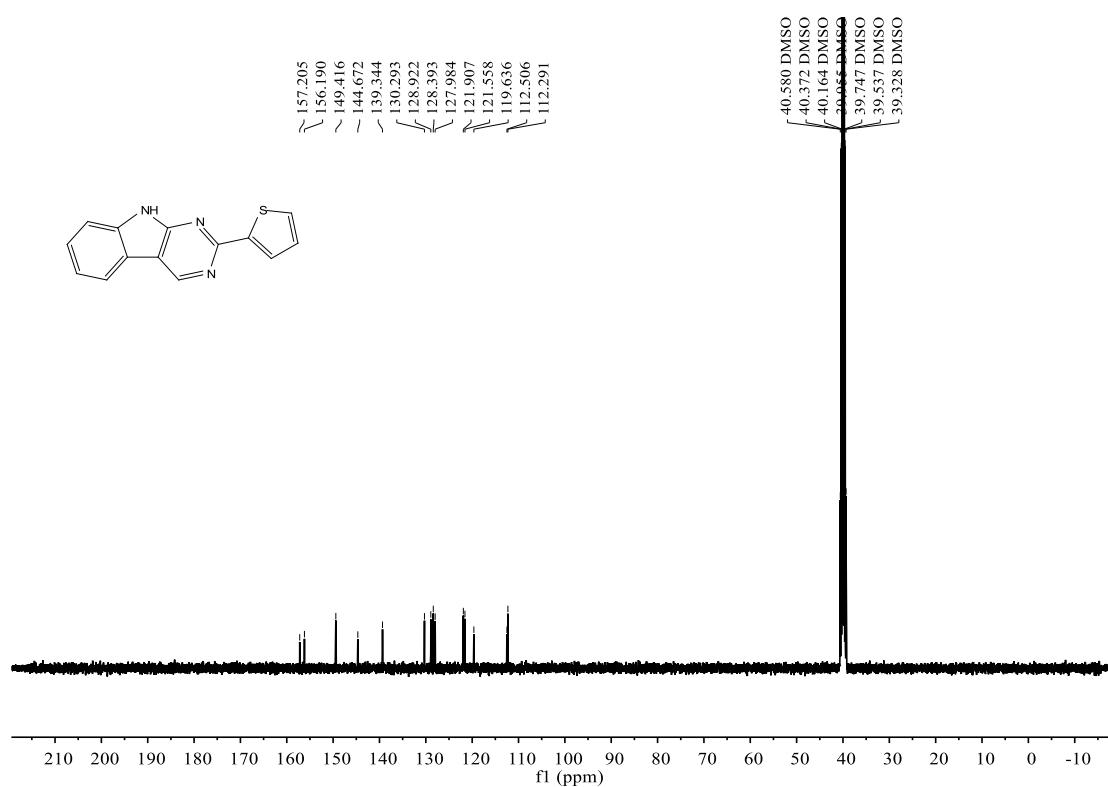

Supplement: s1 [file s1 › catalysts-2252948-supplementary.pdf]
