# Supplementary material for: Four-Component Synthesis of 9H-Pyrimido[4,5-b]indoles Using Ammonium Iodide as the Nitrogen Source
Source: MDPI journal article supplement (doi:10.3390/catal13030623), 2023-03-20
Supplement: s1 [file s1]

Archive with 1 entries (1 files):
- catalysts-2252948-supplementary.pdf
